# Supplementary material for: Protocol for a multicentre, parallel-group, open-label randomised controlled trial comparing ferric carboxymaltose with the standard of care in anaemic Malawian pregnant women: the REVAMP trial
Source: PubMed Central journal article supplement (PMC8611444; doi:10.1136/bmjopen-2021-053288), 2021-11-23
Supplement: bmjopen-2021-053288.draft_revisions.pdf [file bmjopen-2021-053288.draft_revisions.pdf]

# BMJ Open

BMJ Open is committed to open peer review. As part of this commitment we make the peer review history of every article we publish publicly available.

When an article is published we post the peer reviewers' comments and the authors' responses online. We also post the versions of the paper that were used during peer review. These are the versions that the peer review comments apply to.

The versions of the paper that follow are the versions that were submitted during the peer review process. They are not the versions of record or the final published versions. They should not be cited or distributed as the published version of this manuscript.

BMJ Open is an open access journal and the full, final, typeset and author-corrected version of record of the manuscript is available on our site with no access controls, subscription charges or pay-per-view fees (<http://bmjopen.bmj.com>).

If you have any questions on BMJ Open's open peer review process please email [info.bmjopen@bmj.com](mailto:info.bmjopen@bmj.com)

# BMJ Open

## Protocol for a multicentre, parallel-group, open-label randomised controlled trial comparing ferric carboxymaltose with the standard of care in anaemic Malawian pregnant women – The REVAMP trial

|                               |                                                                                                                                                                                                                                                                                                                                                                                                                                                                                                                                                                                                                                                                                                                                                                                                                                                                                                                                                                                                                                                                                                                                                                                                                                                                                                                                                                                                                                                                                                                                                                                                                                                                                                                                                                                                                                                                                                                                                                                                                                                                                                                                                                                                                                                                                                                                                                                                                                                                                               |
|-------------------------------|-----------------------------------------------------------------------------------------------------------------------------------------------------------------------------------------------------------------------------------------------------------------------------------------------------------------------------------------------------------------------------------------------------------------------------------------------------------------------------------------------------------------------------------------------------------------------------------------------------------------------------------------------------------------------------------------------------------------------------------------------------------------------------------------------------------------------------------------------------------------------------------------------------------------------------------------------------------------------------------------------------------------------------------------------------------------------------------------------------------------------------------------------------------------------------------------------------------------------------------------------------------------------------------------------------------------------------------------------------------------------------------------------------------------------------------------------------------------------------------------------------------------------------------------------------------------------------------------------------------------------------------------------------------------------------------------------------------------------------------------------------------------------------------------------------------------------------------------------------------------------------------------------------------------------------------------------------------------------------------------------------------------------------------------------------------------------------------------------------------------------------------------------------------------------------------------------------------------------------------------------------------------------------------------------------------------------------------------------------------------------------------------------------------------------------------------------------------------------------------------------|
| Journal:                      | <i>BMJ Open</i>                                                                                                                                                                                                                                                                                                                                                                                                                                                                                                                                                                                                                                                                                                                                                                                                                                                                                                                                                                                                                                                                                                                                                                                                                                                                                                                                                                                                                                                                                                                                                                                                                                                                                                                                                                                                                                                                                                                                                                                                                                                                                                                                                                                                                                                                                                                                                                                                                                                                               |
| Manuscript ID                 | bmjopen-2021-053288                                                                                                                                                                                                                                                                                                                                                                                                                                                                                                                                                                                                                                                                                                                                                                                                                                                                                                                                                                                                                                                                                                                                                                                                                                                                                                                                                                                                                                                                                                                                                                                                                                                                                                                                                                                                                                                                                                                                                                                                                                                                                                                                                                                                                                                                                                                                                                                                                                                                           |
| Article Type:                 | Protocol                                                                                                                                                                                                                                                                                                                                                                                                                                                                                                                                                                                                                                                                                                                                                                                                                                                                                                                                                                                                                                                                                                                                                                                                                                                                                                                                                                                                                                                                                                                                                                                                                                                                                                                                                                                                                                                                                                                                                                                                                                                                                                                                                                                                                                                                                                                                                                                                                                                                                      |
| Date Submitted by the Author: | 10-May-2021                                                                                                                                                                                                                                                                                                                                                                                                                                                                                                                                                                                                                                                                                                                                                                                                                                                                                                                                                                                                                                                                                                                                                                                                                                                                                                                                                                                                                                                                                                                                                                                                                                                                                                                                                                                                                                                                                                                                                                                                                                                                                                                                                                                                                                                                                                                                                                                                                                                                                   |
| Complete List of Authors:     | <p>Mwangi, Martin; Training and Research Unit of Excellence (TRUE), Nutrition and Infectious Diseases; University of Malawi College of Medicine, School of Public Health and Family Medicine, Department of Public Health</p> <p>Mzembe, Glory; Training and Research Unit of Excellence (TRUE), Nutrition and Infectious Diseases; University of Malawi College of Medicine, School of Public Health and Family Medicine, Department of Public Health</p> <p>Moya, Ernest; Training and Research Unit of Excellence (TRUE), Nutrition and Infectious Diseases; University of Malawi College of Medicine, School of Public Health and Family Medicine, Department of Public Health</p> <p>Braat, Sabine ; University of Melbourne School of Population and Global Health, Centre for Epidemiology and Biostatistics; The University of Melbourne Melbourne Medical School, Department of Infectious Diseases</p> <p>Harding, Rebecca; The Walter and Eliza Hall Institute of Medical Research, Population Health and Immunity Division</p> <p>Robberstad, Bjarne; University of Bergen, Department of Global Public Health and Primary Care</p> <p>Simpson, Julie; University of Melbourne School of Population and Global Health, Centre for Epidemiology and Biostatistics</p> <p>Stones, William; University of Malawi, Obstetrics &amp; Gynaecology</p> <p>Rogerson, Stephen; University of Melbourne, Department of Medicine at the Peter Doherty Institute for Infection and Immunity; The University of Melbourne Melbourne Medical School, Department of Infectious Diseases</p> <p>Biselele, Kabeya; Zomba Central Hospital</p> <p>Chinkhumba, Jobiba; University of Malawi College of Medicine, Malaria Alert Centre</p> <p>Larson, Leila; University of South Carolina Arnold School of Public Health, Department of Health Promotion, Education, and Behavior</p> <p>Ataide, Ricardo; The Walter and Eliza Hall Institute of Medical Research, Population Health and Immunity Division; The University of Melbourne, Department of Infectious Diseases</p> <p>Phiri, Kamija; Training and Research Unit of Excellence (TRUE); University of Malawi College of Medicine, School of Public Health and Family Medicine, Department of Public Health</p> <p>Pasricha, Sant-Rayn; Walter and Eliza Hall Institute of Medical Research, Population Health and Immunity Division; The Royal Melbourne Hospital, Diagnostic Haematology and Clinical Haematology, The Peter MacCallum</p> |

1  
2  
3  
4  
5  
6  
7  
8  
9  
10  
11  
12  
13  
14  
15  
16  
17  
18  
19  
20  
21  
22  
23  
24  
25  
26  
27  
28  
29  
30  
31  
32  
33  
34  
35  
36  
37  
38  
39  
40  
41  
42  
43  
44  
45  
46  
47  
48  
49  
50  
51  
52  
53  
54  
55  
56  
57  
58  
59  
60

|           |                                                                                                                                                                           |
|-----------|---------------------------------------------------------------------------------------------------------------------------------------------------------------------------|
|           | Cancer Centre                                                                                                                                                             |
| Keywords: | Anaemia < HAEMATOLOGY, Nutrition < TROPICAL MEDICINE, Epidemiology < TROPICAL MEDICINE, Clinical trials < THERAPEUTICS, PUBLIC HEALTH, Epidemiology < INFECTIOUS DISEASES |
|           |                                                                                                                                                                           |

SCHOLARONE™  
Manuscripts

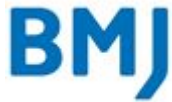

I, the Submitting Author has the right to grant and does grant on behalf of all authors of the Work (as defined in the below author licence), an exclusive licence and/or a non-exclusive licence for contributions from authors who are: i) UK Crown employees; ii) where BMJ has agreed a CC-BY licence shall apply, and/or iii) in accordance with the terms applicable for US Federal Government officers or employees acting as part of their official duties; on a worldwide, perpetual, irrevocable, royalty-free basis to BMJ Publishing Group Ltd ("BMJ") its licensees and where the relevant Journal is co-owned by BMJ to the co-owners of the Journal, to publish the Work in this journal and any other BMJ products and to exploit all rights, as set out in our [licence](#).

The Submitting Author accepts and understands that any supply made under these terms is made by BMJ to the Submitting Author unless you are acting as an employee on behalf of your employer or a postgraduate student of an affiliated institution which is paying any applicable article publishing charge ("APC") for Open Access articles. Where the Submitting Author wishes to make the Work available on an Open Access basis (and intends to pay the relevant APC), the terms of reuse of such Open Access shall be governed by a Creative Commons licence – details of these licences and which [Creative Commons](#) licence will apply to this Work are set out in our licence referred to above.

Other than as permitted in any relevant BMJ Author's Self Archiving Policies, I confirm this Work has not been accepted for publication elsewhere, is not being considered for publication elsewhere and does not duplicate material already published. I confirm all authors consent to publication of this Work and authorise the granting of this licence.

1  
2  
3  
4  
5 **Protocol for a multicentre, parallel-group, open-label randomised controlled trial comparing ferric**  
6 **carboxymaltose with the standard of care in anaemic Malawian pregnant women – The REVAMP**  
7 **trial**  
8  
9  
10  
11  
12  
13  
14

15 **Authors**

16 Martin N Mwangi<sup>1,2</sup>, Glory Mzembe<sup>1,2</sup>, Ernest Moya<sup>1,2</sup>, Sabine Braat<sup>7,8</sup>, Rebecca Harding<sup>4</sup>, Bjarne  
17 Robberstad<sup>5</sup>, Julie Simpson<sup>8</sup>, William Stones<sup>2</sup>, Stephen Rogerson,<sup>6,7</sup> Kabeya Biselele<sup>12</sup>, Jobiba  
18 Chinkhumba<sup>3</sup>, Leila Larson<sup>9</sup>, Ricardo Ataíde<sup>4, 7</sup>, Kamija S Phiri<sup>1,2</sup>, Sant-Rayn Pasricha<sup>4,10,11</sup>  
19  
20  
21  
22  
23  
24  
25  
26  
27

28 *Institutions (Full name, department, institution, city and country of all co-authors)*

- 29 1. Training and Research Unit of Excellence (TRUE), 1 Kufa Road, P.O. Box 30538, Chichiri, BT3,  
30 Blantyre, Malawi.
- 31 2. School of Public Health and Family Medicine, Department of Public Health, College of  
32 Medicine, University of Malawi, Private Bag 360, Chichiri, BT3, Blantyre, Malawi.
- 33 3. Malaria alert centre, College of Medicine, Blantyre, Malawi
- 34 4. Population Health and Immunity Division, The Walter and Eliza Hall Institute of Medical  
35 Research, 1G Royal Parade, Parkville, Melbourne 3052, Australia.
- 36 5. Department of Global Public Health and Primary Care, University of Bergen, Bergen, Norway
- 37 6. Department of Medicine at the Peter Doherty Institute for Infection and Immunity,  
38 University of Melbourne, Melbourne, Australia.
- 39 7. Department of Infectious Diseases, Melbourne Medical School, The University of  
40 Melbourne, Melbourne, Australia
- 41 8. Centre for Epidemiology and Biostatistics, Melbourne School of Population and Global  
42 Health, The University of Melbourne, Melbourne, Australia  
43  
44  
45  
46  
47  
48  
49  
50  
51  
52  
53  
54  
55  
56  
57  
58  
59  
60

- 1  
2  
3 9. Department of Health Promotion, Education, and Behavior, Arnold School of Public Health,  
4  
5 University of South Carolina, Columbia, South Carolina, USA  
6
- 7  
8 10. Diagnostic Haematology, The Royal Melbourne Hospital; and Clinical Haematology, The Peter  
9  
10 MacCallum Cancer Centre and The Royal Melbourne Hospital, Parkville VIC 3050 Australia  
11
- 12 11. Department of Medical Biology, Faculty of Medicine, Dentistry and Health Sciences, The  
13  
14 University of Melbourne  
15
- 16 12. Zomba Central Hospital, Department of Obstetrics and Gynecology, P.O. Box 21, Zomba,  
17  
18 Malawi.  
19

20  
21  
22  
23 **Protocol registry number:** ACTRN12618001268235  
24

25  
26  
27  
28 **Corresponding author:**

29  
30 Martin N. Mwangi, P.O. Box 30538, Chichiri, BT3, Blantyre, Malawi. Email: [mmwangi@true.mw](mailto:mmwangi@true.mw)  
31  
32

33  
34 Word count: 4,521 words. (Abstract) 299 words. (*excluding title page, abstract, references, figures*  
35  
36 *and tables*)  
37  
38  
39  
40  
41  
42  
43  
44  
45  
46  
47  
48  
49  
50  
51  
52  
53  
54  
55  
56  
57  
58  
59  
60

**ABSTRACT**

**Introduction:** Anaemia in pregnancy remains a critical global health problem, affecting 46% of pregnant women in Africa and 49% in Asia. Oral iron therapy requires extended adherence to achieve correction of anaemia and replenishment of iron stores. Ferric carboxymaltose (FCM) is a recently established intravenous iron formulation associated with substantial advantages in safety, speed of delivery and total dose deliverable in a single infusion. We aim to determine whether FCM given once during the second trimester of pregnancy compared to standard oral iron distributed through routine antenatal services is effective and safe for treatment of moderate to severe maternal anaemia in sub-Saharan Africa.

**Methods and analysis:** REVAMP is a two-arm confirmatory individually-randomised controlled trial set in Blantyre and Zomba districts in Malawi. The trial will randomise 862 women in the second trimester of pregnancy with a capillary haemoglobin concentration below 10.0g/dL. The study comprises two arms: (a) intravenous ferric carboxymaltose (20mg/kg up to 1000mg) given once at randomisation, and (b) standard of care oral iron (65mg elemental iron twice daily) for 90 days (or the duration of pregnancy, whichever is shorter) provided according to local health care practices. Both arms receive sulfadoxine-pyrimethamine (SP) as Intermittent Preventive Treatment in pregnancy (IPTp). The primary outcome is the prevalence of anaemia (Hb<11.0g/dL) at 36 weeks' gestation. Secondary outcomes include birth weight, gestation duration, and safety outcomes, including clinical malaria, serious perinatal events and postpartum haematologic and health-related outcomes in the mother and child.

**Ethics and dissemination:** Ethical approval was granted by the Research Ethics Committee (COMREC P.02/18/2357) in Malawi and the Human Research Ethics Committee (WEHI: 18/02), Melbourne, Australia. The protocol is registered with the Australian and New Zealand Clinical Trials Registry

1  
2  
3 ([ACTRN12618001268235](#)). The results will be shared with the local community that enabled the  
4  
5 research, and also to the international fora.

6  
7 **Keywords:** Anaemia, Iron Deficiency, Intravenous Iron, ferric carboxymaltose (FCM), Pregnancy,  
8  
9 Malawi, randomised controlled trial

#### 10 11 12 **Data Statement**

13  
14 All relevant data are within the paper and its supporting information files.

#### 15 16 17 18 19 **Protocol version**

20  
21 REVAMP Trial protocol version 5.0 dated 21 November 2020

#### 22 23 24 **Ethics approval**

25  
26 College of Medicine Research Ethics Committee (COMREC P.02/18/2357) in Malawi and the Walter  
27  
28 and Eliza Hall Institute of Medical Research Human Research Ethics Committee (WEHI: 18/02),  
29  
30 Melbourne, Australia.

#### 31 32 33 **Trial Sponsor**

34  
35 Director - Research Support Centre

36  
37 College of Medicine, Private Bag 360, Chichiri, Blantyre 3, Malawi

38  
39 Email: [rsdirector@medcol.mw](mailto:rsdirector@medcol.mw)

#### 40 41 42 43 44 **Roles and responsibilities of sponsor and funder:**

45  
46 The sponsor and funder had no role in study design. They will have no role nor ultimate authority in  
47  
48 the collection, management, analysis, and interpretation of data; writing of the report; and the  
49  
50 decision to submit the report for publication.  
51  
52  
53  
54  
55  
56  
57  
58  
59  
60



## ARTICLE SUMMARY

### Strengths and limitations of this study

1. Trial setting: The trial is conducted in a low-income sub-Saharan African setting where there is a high prevalence of anaemia in pregnancy, low birth weight and *P. falciparum* malaria. The trial will provide critical new data on the effectiveness and safety of intravenous iron in a context where a) anaemia and iron deficiency rates are high, b) malaria is prevalent and causes anaemia, and c) iron interventions may increase malaria infection rates. In these settings, needs for anaemia control are critical.
2. Participant screening: Eligibility for inclusion is determined by moderate or severe anaemia detected via capillary haemoglobin estimation, which at present is a convenient and available method for assessing anaemia status that could be deployed in the high-throughput health centre setting; our results will thus provide direct information on the impact of this highly feasible screening and treatment approach for antenatal anaemia.
3. Use of ferric carboxymaltose: this is the first trial in a low-income field setting to use a recently established intravenous iron formulation for the treatment of anaemia in pregnancy; previous trials in low-income settings have used older formulations such as iron sucrose and iron dextrans, which may have a higher risk of adverse events and take longer to infuse, and thus are suboptimal for routine deployment in the health centre setting.
4. Outcomes: our trial includes a critical primary outcome of anaemia before delivery, as well as key secondary outcomes to assess the benefit of the trial intervention for mother and neonate, and detailed safety assessments using active and passive data collection.
5. Sample size: this is the largest trial of ferric carboxymaltose in pregnancy. It is also among the largest trials of ferric carboxymaltose (and intravenous iron) ever conducted. The study will thus provide critical effectiveness and safety information on this drug's role in pregnancy globally.

## INTRODUCTION

Anaemia during pregnancy remains a critical global health problem. Almost 40% of pregnant women worldwide are anaemic, including 46% of pregnant women in Africa and 49% in Asia.<sup>1</sup> Anaemia in pregnancy is very common and mostly results from iron deficiency and is associated with critical risks for both mother (e.g. life-threatening complications of postpartum haemorrhage) and child (especially prematurity and low birth weight,<sup>2</sup> which are associated with increased risk of neonatal and infant mortality,<sup>3</sup> and reduced iron stores in infancy with increased risk of subsequent anaemia and impaired development).<sup>4</sup> Severe anaemia in pregnancy is associated with a significantly increased risk of maternal mortality.<sup>5</sup> Worldwide, 15%-20% of births (>20 million annually, including 13% in sub-Saharan Africa) are low birthweight. At the same time, each year, over 1 million children die from preterm birth complications, making prevention and treatment of antenatal anaemia a crucial component of efforts to reduce low birth weight.

Systematic reviews confirm likely benefits from iron on maternal outcomes, including anaemia (70% reduction) and trends towards favourable infant outcomes, including increased birth weight and extended gestation duration.<sup>6</sup> A trial of oral iron compared with placebo in Kenyan pregnant women confirmed a benefit from iron on birth weight and gestation duration.<sup>7</sup> Global recommendations for managing anaemia in pregnancy in lower and middle income countries (LMICs) currently advise that women be treated with high-dose daily oral iron (120 mg of elemental iron) supplementation for three months<sup>8 9</sup>. However, oral iron is often poorly tolerated due to gastrointestinal adverse effects,<sup>10</sup> limiting adherence. Delivery of iron during pregnancy requires high-quality performance of the primary health system. In Malawi, 10.6% of women were reported to take no iron during pregnancy, and 37.1% take less than 60 doses, with only 33.4% taking the recommended 90 or more doses.<sup>11</sup> Even when delivered, oral iron frequently fails to correct anaemia. For example, 61% of Gambian pregnant women who received iron at week 20 of gestation – when their Hb was lower than 10.0g/dL - still had a Hb<10.0g/dL at 30 weeks' gestation.<sup>12</sup> Finally, women may only present for their first antenatal visit

1  
2  
3 late in the second trimester, curtailing the time available to optimise iron stores with oral iron to  
4  
5 improve foetal development and risks associated with delivery; for example, in Malawi, fewer than  
6  
7 30% of pregnant women attend before the sixteenth week of gestation.<sup>13</sup>  
8  
9

10  
11  
12 Over the past decade, there have been dramatic improvements in parenteral (intravenous) iron  
13  
14 therapeutics. Ferric carboxymaltose (FCM) is a widely used formulation that can be administered in a  
15  
16 short period (15 min) and at large doses (up to 1000 mg) in a single infusion<sup>14 15</sup>. FCM has  
17  
18 revolutionised the treatment of iron-deficiency anaemia in high-income country settings and is widely  
19  
20 used in outpatient settings, emergency departments, and primary care.<sup>16</sup> In pregnancy, intravenous  
21  
22 iron has been reported to be superior to oral iron in improving haemoglobin concentrations and may  
23  
24 even increase birth weight.<sup>17</sup> Intravenous iron is increasingly recommended as a suitable first-line  
25  
26 option for women with moderate or severe iron-deficiency anaemia beyond the first trimester of  
27  
28 pregnancy.<sup>18</sup>  
29  
30  
31  
32  
33  
34

35 It remains challenging to directly measure iron status in the field, as biomarkers generally require  
36  
37 analysis using centralised laboratory infrastructure. In contrast, point-of-care measurement of  
38  
39 capillary haemoglobin is a feasible field-friendly testing strategy that can be deployed with existing  
40  
41 technology, of which HemoCue point-of-care devices are a good example. Screen-and-treat  
42  
43 approaches for anaemia in pregnancy must rely on haemoglobin measurement until point-of-care  
44  
45 assays for iron status become more widely available.  
46  
47  
48  
49

50  
51 FCM presents a practical opportunity for rapid correction of moderate and severe antenatal anaemia  
52  
53 in a single dose, potentially improving maternal and neonatal clinical outcomes for pregnant women.  
54  
55 It is, therefore, urgent to test this therapy in a low-income field setting where the burden of anaemia-  
56  
57 related disease is heaviest. In Malawian pregnant women with moderate or severe anaemia during  
58  
59 the second trimester of pregnancy, we aim to evaluate whether a single dose of intravenous ferric  
60

1  
2  
3 carboxymaltose is superior to standard-of-care oral iron.  
4  
5

## 6 **METHODS AND ANALYSIS**

### 9 **Patient and Public Involvement**

10  
11  
12 We held discussions with national policy stakeholders during the study planning stage, including the  
13  
14 Ministry of Health. We discussed how the research might align with national research and health  
15  
16 service priorities. Local community engagement was done via public meetings; the potential  
17  
18 participants were first involved in the study's design during these meetings. We discussed the study  
19  
20 with the traditional leaders, including traditional authorities (TAs), group village headmen (GVH),  
21  
22 the village development committee (VDC), and ward councillors (political figures). The GVH were  
23  
24 requested to cascade the information to the village chiefs who took the information to the  
25  
26 community. Health workers were accessed via the District Health Offices in Blantyre and Zomba  
27  
28 districts. Health workers from the participating health facilities, including the health surveillance  
29  
30 assistants (HSAs) who directly work with the community, were informed about the proposed  
31  
32 research and discussions on priorities beneficial to the community were discussed. The public,  
33  
34 potential participants, and health workers identified malaria and anaemia as major public health  
35  
36 issues in the community. Women outlined their experiences with iron supplements during their past  
37  
38 pregnancies and identified the development of tolerable iron formulations as a research priority.  
39  
40 Dissemination of findings at the national and community level will follow the schema used during  
41  
42 study design and inception as outlined above.  
43  
44  
45  
46  
47  
48

### 49 **Trial objectives**

50  
51  
52 The primary objective of the trial is to determine whether, in Malawian women in the second trimester  
53  
54 of pregnancy with moderate or severe anaemia, a single dose of FCM up to 1000mg is superior to  
55  
56 standard-of-care (i.e. oral iron provided through local health services), in reducing maternal anaemia  
57  
58 before delivery (at 36 weeks' gestation).  
59  
60

1  
2  
3 The secondary objectives are:  
4  
5

6 During pregnancy and up to one month postpartum, to determine the effects of FCM (compared with  
7  
8 standard-of-care) on:  
9

- 10  
11
- 12 • Maternal haemoglobin concentration and iron status (measured through iron biomarkers),
  - 13 • Critical neonatal outcomes including birth weight (low birth weight), gestation duration  
14 (prematurity), small for gestational age and other perinatal outcomes, and  
15
  - 16 • Maternal and neonatal adverse events, including infection episodes, serious maternal  
17 complications, and hypophosphatemia.  
18  
19  
20  
21
- 22

23 Exploratory objectives up to one month postpartum for subsequent hypothesis generation are  
24 related to maternal cognition, depression, and fatigue, as well as costs of health care.  
25  
26  
27  
28  
29  
30

### 31 **Study design**

32  
33 REVAMP is a multicentre, open-label, two-arm, parallel-group randomised controlled trial (RCT). An  
34 open-label (rather than blinded) design was selected as it was considered unfeasible to deliver the  
35 placebo intravenous infusions to Malawian pregnant women in this field-trial context (the drug is dark-  
36 coloured). The trial is recruiting pregnant women in their second trimester and following them until  
37 one month postpartum, after which we will report on the primary and secondary objectives. Extended  
38 follow-up of mothers and infants to 12-months postpartum is planned, as is a range of exploratory  
39 economic, biological and clinical outcomes. These analyses are beyond the scope of this protocol, as  
40 are the exploratory outcomes collected up to one month postpartum, and they will be reported  
41 separately. The trial design is summarised in **Figure 1**.  
42  
43  
44  
45  
46  
47  
48  
49  
50  
51  
52

### 53 **Study settings and participants**

54  
55  
56  
57  
58  
59  
60

1  
2  
3 In Malawi, the average gestation age at the first antenatal clinic (ANC) visit is 22 weeks, with 61%  
4 presenting before 24 weeks. The 2015-16 DHS survey estimated a prevalence of anaemia (Hb <  
5 11.0g/dL) in pregnant women in Malawi at 45.1%, including 22.4% of women with moderate or severe  
6 anaemia.<sup>11</sup> The prevalence of low birth weight in Malawi was around 14% in 2015.<sup>19</sup> Malawi is endemic  
7 for malaria and the prevalence of *Plasmodium spp.* parasitaemia at the first ANC visit in the study site  
8 exceeds 15%.<sup>20</sup> About 87% of women consume at least one dose of intermittent preventive treatment  
9 during pregnancy (IPTp), but this falls to 30% for women taking three or more doses.<sup>11</sup>

10  
11  
12 The REVAMP study has two major research sites namely Limbe Health Centre and Zomba Central  
13 Hospital located in Blantyre and Zomba districts respectively, in Southern Malawi. The two major sites  
14 act as the study coordination centres in the respective districts. The Blantyre site serves as the base  
15 for five urban health centres/antenatal clinics, whilst the Zomba site serves as the base for nine (four  
16 urban and five rural) health centres/antenatal clinics. Women are screened at the antenatal clinics  
17 and referred to the coordinating research site for enrolment, treatment and follow-up visits. Deliveries  
18 occur in government-operated birth suites attached to the study site with referral to a district hospital  
19 where required for obstetric indications.

### 20 21 22 **Eligibility criteria**

23  
24  
25 Women are only randomised if they fulfil all inclusion criteria and none of the exclusion criteria.

#### 26 27 *Inclusion criteria:*

- 28  
29 1. Confirmed singleton pregnancy at 13-26 weeks' gestation
- 30  
31 2. Moderate to severe anaemia (capillary haemoglobin <10.0g/dL measured by HemoCue 301+) not  
32  
33 clinically deemed to require an immediate blood transfusion

- 1
- 2
- 3 3. Negative malaria parasitaemia at screening and no positive malaria rapid diagnostic test within
- 4 the previous seven days
- 5
- 6
- 7
- 8 4. Resident in the study catchment area of Blantyre and Zomba district
- 9
- 10 5. Plan to deliver at a health facility
- 11
- 12 6. Written informed consent, including assent if <18 years old (consent of a parent or guardian plus
- 13 the participant's assent).
- 14
- 15
- 16

17 *Exclusion criteria:*

- 18
- 19
- 20 1. Hypersensitivity to any of the study drugs
- 21
- 22 2. Clinical symptoms of malaria or positive malaria rapid diagnostic test within the previous seven
- 23 days, or symptoms of bacterial infection, at screening
- 24
- 25
- 26 3. Any condition requiring hospitalisation or serious concomitant illness
- 27
- 28 4. Chronic illness that may adversely affect foetal growth and viability
- 29
- 30 5. Severe anaemia clinically judged as requiring a blood transfusion (usually Hb <5.0g/dL)
- 31
- 32 6. Pre-eclampsia at screening (new onset of hypertension, proteinuria and swelling in the legs, feet,
- 33 and hands).
- 34
- 35
- 36
- 37
- 38
- 39

40 **Trial Interventions**

41

42

43 Participants are randomly assigned to receive one of the following interventions:

- 44
- 45
- 46 1. **Intravenous iron:** ferric carboxymaltose 20mg/kg up to 1000mg, diluted in normal saline and
- 47 given over 15 minutes, once after randomisation. The study clinician administers the drug, and
- 48 women remain under observation for 45 minutes after drug administration. Women receiving
- 49 FCM are treated in rooms equipped with a trolley containing adrenaline, hydrocortisone,
- 50 intravenous fluids and antihistamines, airway equipment and an oxygen concentrator. Staff are
- 51 trained in the management of allergic reactions.
- 52
- 53
- 54
- 55
- 56
- 57
- 58
- 59
- 60

- 1  
2  
3  
4  
5  
6  
7  
8  
9  
10  
11  
12
2. **Standard-of-care - Oral iron treatment course:** oral iron- 200mg ferrous sulphate (approx. 65mg elemental iron) twice daily for 90 days or the remaining duration of pregnancy, whichever is shorter. Oral iron is provided by health workers using the same education messaging and similar packaging as provided by the routine health system to reflect real-life health service conditions.

13  
14  
15  
16  
17  
18  
19  
20  
21  
22  
23  
24  
25  
26  
27  
28  
29  
30  
31

Following national guidelines, both groups receive IPTp with 1500 mg sulfadoxine and 75 mg pyrimethamine (SP), as three tablets of SP of fixed dose (500mg/25mg) at least three times during pregnancy, at least four weeks apart. The IPTp-SP course at four weeks' post-randomisation is directly observed by study staff. HIV positive women in Malawi are not offered SP because they are already on cotrimoxazole prophylaxis. The baseline dose is also directly administered by study staff if the participant did not receive it through the health service. All participants also receive an insecticide-treated bed net.

### 32 **Randomisation, allocation concealment, and blinding**

33  
34  
35  
36  
37  
38  
39  
40  
41  
42  
43  
44

Participants are randomly allocated to one of the two treatments arms with 1:1 allocation via a computer-generated randomisation schedule of randomly permuted blocks stratified by research site (Blantyre, Zomba) to achieve a balance between the arms within each site. The randomisation list was generated by an independent statistician at the University of Melbourne (Australia).

45  
46  
47  
48  
49  
50  
51  
52  
53  
54  
55  
56  
57  
58  
59  
60

Individual participant codes were pre-packed in sealed envelopes by an independent researcher not associated with the study and held securely at the research sites. Eligible participants who meet all inclusion/exclusion criteria are sequentially allocated participant identification numbers within the research site, and their allocation to study group is revealed after opening the corresponding sealed envelope. Although the trial is open-label, laboratory scientists measuring haemoglobin concentration, midwives collecting birth outcome data, and investigators and researchers in Australia



1  
2  
3 (including data managers and statisticians in Melbourne) are blinded to the treatment allocation  
4  
5 during the conduct of the trial until the database is locked and ready for unblinding.  
6  
7

## 8 **Recruitment and Visits**

9

10  
11 **Table 1** shows the schedule of activities per visit for the mother, and **Table 2** shows the schedule of  
12  
13 activities per visit for the neonate.  
14  
15  
16  
17  
18  
19  
20  
21  
22  
23  
24  
25  
26  
27  
28  
29  
30  
31  
32  
33  
34  
35  
36  
37  
38  
39  
40  
41  
42  
43  
44  
45  
46  
47  
48  
49  
50  
51  
52  
53  
54  
55  
56  
57  
58  
59  
60

For peer review only

**Table 1: Planned activities per visit for mothers**

|                                               | Visit 0                     | Visit 1                              | Visit 2                              | Visit 3 <sup>j</sup>            | Visit 4                              | Visit 5 –<br>6 <sup>j</sup>            | Visit 7                              | Visit 8                          |
|-----------------------------------------------|-----------------------------|--------------------------------------|--------------------------------------|---------------------------------|--------------------------------------|----------------------------------------|--------------------------------------|----------------------------------|
| <b>Protocol activity</b>                      | Day -7 to 0                 | Day 0                                | Day 28 ±2<br>days                    | 34 wks.<br>gestation<br>±2 days | 36 wks.<br>gestation<br>±2 days      | 38-40<br>wks.<br>gestation<br>± 2 days | Delivery<br>+ 1 day                  | Day 28<br>postpartum<br>±2 days  |
| <i>Location of visit</i>                      | <i>Antenatal<br/>Clinic</i> | <i>Research<br/>Site<sup>a</sup></i> | <i>Research<br/>Site<sup>a</sup></i> | <i>Home<sup>b</sup></i>         | <i>Research<br/>Site<sup>a</sup></i> | <i>Home<sup>b</sup></i>                | <i>Research<br/>Site<sup>a</sup></i> | <i>Research Site<sup>a</sup></i> |
| Informed consent process for<br>pre-screening | X                           |                                      |                                      |                                 |                                      |                                        |                                      |                                  |
| Pre-screening                                 | X                           |                                      |                                      |                                 |                                      |                                        |                                      |                                  |
| Detailed Informed consent<br>process          | X                           | X                                    |                                      |                                 |                                      |                                        |                                      |                                  |
| Screening                                     |                             | X                                    |                                      |                                 |                                      |                                        |                                      |                                  |
| Medical & obstetric history                   |                             | X                                    |                                      |                                 |                                      |                                        |                                      |                                  |
| Demographics                                  |                             | X                                    |                                      |                                 |                                      |                                        |                                      |                                  |
| Maternal physical examination <sup>d</sup>    |                             | X <sup>h</sup>                       | X <sup>i</sup>                       |                                 | X <sup>i</sup>                       |                                        | X <sup>h</sup>                       | X <sup>i</sup>                   |



1  
2  
3 <sup>a</sup>Visit conducted at the research site/health facility; <sup>b</sup> Visit conducted at the participant's home; <sup>c</sup> Assessing if intermittent preventive treatments  
4 sulphadoxine pyrimethamine and albendazole were given; <sup>d</sup> Protocol activities are also collected at any unscheduled visits; <sup>e</sup> Malaria diagnostics  
5 include malaria rapid diagnostic test, malaria microscopy, <sup>f</sup> Serum for iron markers tests include serum ferritin; <sup>g</sup> Serum for inflammatory markers  
6 tests include C-reactive protein and alpha-1 glycoprotein; <sup>h</sup> Complete maternal physical examination includes general appearance, throat, neck,  
7 thyroid, musculoskeletal, skin, lymph nodes, extremities, pulses, pulmonary, cardiac, abdominal, and neurological examination; <sup>i</sup> Limited maternal  
8 physical examination includes general appearance, brief pulmonary, cardiac, abdominal and neurological examination. <sup>j</sup> Since the opening of the  
9 trial, visits 3, 5 and 6 have been suspended since April 2020 due to the risk of exposing communities to COVID-19 during home visits.  
10  
11  
12  
13  
14  
15  
16  
17  
18  
19  
20  
21  
22  
23  
24  
25  
26  
27  
28  
29  
30  
31  
32  
33  
34  
35  
36  
37  
38  
39  
40  
41  
42  
43  
44  
45  
46  
47  
48  
49  
50  
51  
52  
53  
54  
55  
56  
57  
58  
59  
60

For peer review only

**Table 2: Details of planned activities per visit for neonates**

| Protocol activity                                      | Visit 7                          | Visit 8                          |
|--------------------------------------------------------|----------------------------------|----------------------------------|
|                                                        | Delivery +1 day                  | Day 28 Postpartum ±2 days        |
| <i>Location of visit</i>                               | <i>Research Site<sup>a</sup></i> | <i>Research Site<sup>a</sup></i> |
| Pregnancy outcome                                      | X                                |                                  |
| Physical examination and anthropometry <sup>b, c</sup> | X <sup>f</sup>                   | X <sup>g</sup>                   |
| <b>Laboratory procedures</b>                           |                                  |                                  |
| Capillary haemoglobin                                  | X <sup>h</sup>                   |                                  |
| Full blood count <sup>b</sup>                          | X <sup>h</sup>                   | X                                |
| Malaria diagnostics <sup>d</sup>                       | X <sup>h</sup>                   | X                                |
| Serum for iron markers tests <sup>e</sup>              | X <sup>h</sup>                   | X                                |
| Vaccination and Vit A supplementation status           |                                  | X                                |
| Adverse events <sup>b</sup>                            | X                                | X                                |
| Morbidities                                            |                                  | X                                |
| Missed visits <sup>b</sup>                             |                                  | X                                |
| End of study                                           | X                                | X                                |

<sup>a</sup> Visit done at the research site/ health facility; <sup>b</sup> Protocol activities are also collected at any unscheduled visits; <sup>c</sup> Anthropometry includes assess the infant's weight, length, and head circumference; <sup>d</sup> Malaria diagnostics include malaria rapid diagnostic test, malaria microscopy, malaria filter paper for polymerase chain reaction and histology at delivery; <sup>e</sup> Serum for iron markers tests include serum ferritin; <sup>f</sup> The complete physical examination includes general appearance, throat, neck, thyroid, musculoskeletal, skin, lymph nodes, extremities, pulses, pulmonary, cardiac, abdominal, and neurological examination <sup>g</sup> The limited examination includes general appearance, brief pulmonary, cardiac, abdominal and neurological examination; <sup>h</sup> These assessments are collected via cord blood.

## Screening and enrolment of participants

Study activities are detailed in Tables 1 and 2.

### *Pre-screening and screening, visit 0 (day -7 to 0)*

Women attending their first antenatal visit at ANCs are given general information (aims and procedures) about the study by a trained research nurse and invited to consent to pre-screening procedures. As the ANC nurse cares for attendees, the research nurse pre-screens potential participants by noting apparent gestation age based on clinical examination and last menstrual period and then tests for anaemia with capillary Hb (HemoCue 301+, Angelholm Sweden) and *Plasmodium* parasitaemia by rapid diagnostic test (SD Bioline Malaria AG P.F/PAN, Standard Diagnostics, Inc.). Potentially eligible participants receive further information about the study. Willing participants are referred to the research site for additional evaluation, full consenting procedure and recruitment.

### *Enrolment, visit 1 (day 0)*

As presented in Table 1, at the health facility, potentially eligible participants undergo ultrasound scanning (within two days from the initial pre-screening visit) to confirm singleton pregnancy and determine gestation age (i.e. crown-rump length for less than or equal to 16 weeks, femur length and head and abdominal circumference for more than 16 weeks). Written informed consent is then obtained for participation in the trial. For consenting participants, a physical examination is conducted, and baseline data are collected, comprising demographic information and medical and obstetric history. Following the collection of baseline clinical data, samples of both capillary and venous blood are collected and then participants are randomised. For women randomised to the ferric carboxymaltose arm of the trial, an intravenous cannula is inserted under aseptic precautions, and a trained nurse administers the study drug according to standard procedures and under the supervision of the study clinician. Women randomised to the standard-of-care arm of the trial are provided with

1  
2  
3 a full course of iron tablets, together with information delivered according to a standardised script  
4  
5 reflecting ANC practice.  
6  
7

### 8 **Subsequent study visits**

9  
10  
11 *Visit 2 (28 ( $\pm$ 2) days after enrolment into the study):* Participants receive a physical examination and  
12  
13 an ultrasound scan before being asked for a venous blood sample (Table 1). A capillary sample is  
14  
15 collected for assessment of *Plasmodium* parasitaemia. The participants are asked to continue their  
16  
17 regular ongoing ANC visits through their local health centre.  
18  
19

20  
21 *Visit 3; visits 5-6 (34 weeks' gestation  $\pm$ 2 days; 38-40 weeks' gestation  $\pm$ 2 days):* Participants are visited  
22  
23 in their home at 34 weeks' gestation, and every two weeks from 38 weeks' gestation until delivery. A  
24  
25 research nurse measures capillary Hb. Where the participant belongs to the standard-of-care trial-  
26  
27 arm, the research nurse attempts to assess adherence. Notably, since the opening of the trial,  
28  
29 fieldwork has been affected by the COVID-19 pandemic. Because of the risks of study workers  
30  
31 introducing COVID-19 into remote villages, home visits were removed from the trial protocol after  
32  
33 April 2020.  
34  
35

36  
37  
38 *Visit 4 (36 weeks' gestation/pre-delivery  $\pm$ 2 days):* Procedures are similar to those for Visit 2 (28-days  
39  
40 post-treatment). This visit includes the assessment of venous haemoglobin for the primary outcome.  
41  
42

43 *Visit 7 (Delivery +1 day):* The study provides 24-hour cover of the study research sites' delivery suites.  
44  
45 All participants are asked to return to the research site for delivery (unless a high-risk pregnancy  
46  
47 requires delivery at the tertiary referral hospital). Standardised delayed cord clamping procedures are  
48  
49 instituted. Participants delivering at home or at other health facilities are encouraged to attend the  
50  
51 research site for assessment within 24 hours. Venous blood samples are collected during labour. Apgar  
52  
53 scores are recorded immediately after delivery, and the newborn undergoes a full physical  
54  
55 examination, including measurement of birth weight, length, head circumference, and assessment for  
56  
57 congenital malformations. The type of birth and occurrence of perinatal complications (including  
58  
59  
60

1  
2  
3 haemorrhage or need for blood transfusion) are recorded. Placental blood is drawn, and a sample of  
4 placental tissue is collected and stored in buffered formalin for subsequent histological evaluation.  
5  
6  
7

8 *Visit 8 (28 days postpartum  $\pm 2$  days):* Participants return to the research site together with their  
9 infants for a detailed medical examination of both mother and infant and collection of blood samples.  
10  
11  
12

13 *Unscheduled visit:* Participants are asked to attend the research site when symptomatically unwell.  
14 They are managed according to national standard treatment guidelines by a trained health care  
15 provider. Blood samples for malaria RDT (and microscopy if RDT positive) and blood culture are taken  
16 if clinically indicated. The clinical diagnosis of the unscheduled visit is recorded in the participant's  
17 record. Where a participant attends another health facility or antenatal clinic, the research team  
18 extracts the missed unscheduled visit notes from the participants health book commonly known as a  
19 health "passport" in Malawi. Usually, clinical investigations and medications are indicated in the  
20 health book and can be extracted by the research team during the next scheduled visit.  
21  
22  
23  
24  
25  
26  
27  
28  
29  
30

### 31 32 **Data Monitoring Committee (DMC)**

33 An independent DMC has been set up to review on a regular basis, safety and efficacy data of the  
34 ongoing trial. The DMC is comprised of international experts in clinical trials, obstetrics,  
35 epidemiology and statistics. In the advent of clear evidence of effectiveness or harm, the DMC will  
36 recommend to the sponsor and investigators whether to continue, modify, or terminate the trial on  
37 ethical grounds.  
38  
39  
40  
41  
42  
43  
44  
45  
46  
47  
48  
49  
50  
51  
52  
53  
54  
55  
56  
57  
58  
59  
60



## Outcomes

The primary outcome is the prevalence of maternal anaemia before delivery, defined as a venous haemoglobin concentration less than 11.0g/dL at 36 weeks' gestation.

Secondary outcomes assessing effectiveness in the mother are anaemia at four weeks' post-randomisation and one month postpartum, haemoglobin concentration, iron deficiency (ferritin<15mg/L adjusted for C-reactive protein), iron deficiency anaemia, and serum ferritin concentration all at four weeks post-randomisation, 36 weeks' gestation, and one month postpartum.

Effectiveness in the neonate is assessed using the outcome of mean birthweight (measured in grams within 24 hours of birth) and the secondary outcomes low birth weight (birth weight less than 2500g), gestation duration (weeks), gestational-age-specific birth weight, small for gestation age, fetal loss (pregnancy loss before 28 completed weeks' gestation), stillbirth (birth of a child showing no signs of life after 28 weeks' gestation), and preterm births (neonate born before 37 completed weeks of gestation), haemoglobin concentration at 1-month postpartum and infant growth (weight for age, length for age, weight for length, head circumference) at one month postpartum.

Outcomes assessing safety in the mother are (serious) adverse events related to administration of FCM (events occurring during the enrolment visit), (serious) adverse events (within 14 days of randomisation, antenatal and postpartum reported separately), all-cause sick visits to the clinic (antenatal and postpartum reported separately), diarrhoea-related visits to the clinic (antenatal and postpartum reported separately), clinical malaria-specific visits to the clinic (antenatal and postpartum reported separately), placental *P. falciparum* (delivery), *P. falciparum* parasitaemia (at four weeks' post-randomisation and 36 weeks' gestation), hypophosphatemia (biochemical) (at four weeks' post-randomisation and 36 weeks' gestation), inflammation (elevated C-reactive protein) (at four weeks' post-randomisation and 36 weeks' gestation), and severe medical events including haemorrhage, sepsis, shock, need for transfusion, ICU admission, or mortality.

1  
2  
3 Safety in the infant is assessed using (serious) adverse events, all-cause visits to the clinic, infection-  
4 related visits to the clinic, diarrhoea-related visits to the clinic, clinical malaria-specific visits to the  
5 clinic, and *P. falciparum* parasitaemia by microscopy at one month postpartum.  
6  
7  
8  
9

10 In addition to the primary and secondary clinical outcomes listed above, which will support the  
11 reporting of the confirmatory RCT, data for many exploratory outcomes are being collected between  
12 enrolment and 12-months postpartum. These include assessing maternal cognition, mother-infant  
13 bonding, maternal depression and fatigue, infant neurodevelopment, infant diet and health economic  
14 data, including direct and indirect costs of health care. Also, women have given their consent for the  
15 collection of samples for future translational studies, including evaluation of the vaginal and faecal  
16 microbiome, maternal immune profiles, and effects of interventions directed towards *P. falciparum*  
17 biology.  
18  
19  
20  
21  
22  
23  
24  
25  
26  
27  
28  
29  
30  
31

### 32 **Detection and reporting of Adverse Events and Serious Adverse Events**

33  
34 Non-serious Adverse Events (AEs) and serious adverse events (SAEs) are collected from the time  
35 consent is given until the participant completes the study (the final visit or withdrawal). These are  
36 detected either through spontaneous reports by the participant, unplanned visits to the research site  
37 or any of the participating health centres, observation by the study staff, and through standard  
38 questioning at each visit. All SAEs are reported to the sponsor and the appropriate ethics committee,  
39 whether or not considered causally related to the study drugs.  
40  
41  
42  
43  
44  
45  
46  
47  
48  
49  
50  
51

### 52 **Sample size**

53  
54  
55 The sample size calculation is based on the primary maternal outcome of the proportion of women  
56 with pre-delivery anaemia (defined as venous Hb<11.0g/dL at 36 weeks' gestation). A systematic  
57 review and meta-analysis identified a 50% reduction in anaemia prevalence in women receiving oral  
58  
59  
60

1  
2  
3 iron.<sup>21</sup> In a cohort of pregnant women in the Gambia, we observed that 60% of pregnant women with  
4 Hb<10.0g/dL at 20 weeks' gestation who then receive iron interventions continue to have  
5 Hb<10.0g/dL by 30 weeks.<sup>22</sup> The pivotal Fer-ASAP trial (which compared FCM to oral iron in women  
6 with iron deficiency anaemia in high-income settings) demonstrated a 14% reduction in absolute  
7 anaemia prevalence compared with oral iron.<sup>23</sup> We hypothesise that routine iron supplementation  
8 will reduce anaemia prevalence from 100% to 60% (as seen in the Gambia,<sup>22</sup> and similar to data from  
9 Haider and colleagues<sup>21</sup>). We hypothesise that ferric carboxymaltose will result in a 10% absolute  
10 improvement in anaemia cure (to a prevalence of 50%). A total sample size of 862 pregnant women  
11 or 431 per group will provide 80% power to detect this difference, allowing for a 10% loss to follow-  
12 up and assuming a two-sided alpha of 5%. The sample size also has at least 80% power to detect an  
13 absolute difference between standard-of-care oral iron and ferric carboxymaltose of 100g in the  
14 neonatal outcome of birth weight (assuming a standard deviation of 450g and a two-sided alpha of  
15 5%), similar to the effect size seen in a trial of Kenyan women receiving oral iron when compared to  
16 placebo.<sup>7</sup>

## 36 STATISTICAL ANALYSIS PLAN

37  
38  
39 A detailed statistical analysis plan will be finalised before unblinding of the database. Analyses will be  
40 performed where participants are classified according to their randomised intervention arm (i.e.  
41 intention to treat principle). An available case analysis will be performed for repeated time point  
42 outcomes (e.g. anaemia) and a complete-case analysis for single time point outcomes (e.g. birth  
43 weight). Anaemia will be analysed using a log-binomial regression model, including study participants  
44 as a random intercept to account for the multiple time points.

45  
46  
47 The model will include the standard-of-care (oral iron) group as the reference group. The primary  
48 maternal hypothesis will be evaluated by obtaining the estimate of the prevalence ratio of IV iron  
49 versus standard-of-care (oral iron), 95% confidence interval extracted at 36 weeks' gestation, and p-  
50  
51  
52  
53  
54  
55  
56  
57  
58  
59  
60

1  
2  
3 value. Birthweight will be analysed by fitting a linear regression model. The primary neonatal  
4  
5 hypothesis will be evaluated by estimating the absolute difference in mean birth weight between IV  
6  
7 iron and standard-of-care (oral iron) along with a corresponding 95% confidence interval and p-value.  
8  
9  
10 Secondary repeated time point binary outcomes will be analysed similarly to anaemia, and secondary  
11  
12 single time point continuous outcomes will be analysed similarly to birthweight. Secondary, single  
13  
14 time point binary outcomes (e.g., sub-optimal pregnancy outcomes) will be analysed using a log-  
15  
16 binomial regression model and secondary, multiple time point continuous outcomes (e.g., maternal  
17  
18 haemoglobin concentration) will be analysed using a likelihood-based longitudinal data analysis  
19  
20 model.<sup>24</sup> Appropriate transformations may be applied to the variables before fitting the model if  
21  
22 considered skewed (e.g. ferritin). Additional analyses using multiple imputation will be performed to  
23  
24 handle missing data. Results will be compared with the main analysis to investigate the findings'  
25  
26 robustness to the missing data assumptions. Safety, including adverse events, infections and clinic  
27  
28 visits, will be presented for the mothers and neonates, respectively. The proportion of study  
29  
30 participants with at least one safety outcome will be compared between groups using a log-binomial  
31  
32 regression model. A Poisson model with robust standard errors will be fitted if there is a non-  
33  
34 convergence of the log-binomial model for efficacy or safety outcomes. Exploratory subgroup analyses  
35  
36 (e.g., by parity, site, iron deficiency) will be performed for maternal and neonatal outcomes,  
37  
38 irrespective of their findings. The analyses models for all study outcomes will adjust for the  
39  
40 randomisation stratification variable of the site as a main effect.  
41  
42  
43  
44  
45  
46  
47  
48  
49

## 50 **Data Management**

51  
52  
53 Data collected from the subjects are recorded in digital Case Report Forms (CRFs) using tablets.  
54  
55 Relevant hard copy patient hospital files are scanned for reference and stored digitally, securely. An  
56  
57 independent Data and Safety Monitoring Board has been established to regularly review the trial's  
58  
59  
60

1  
2  
3 progress and blinded and unblinded results. The Research Support Centre at the College of Medicine  
4 performs independent monitoring of the study on behalf of the sponsor. No interim analysis is  
5  
6 planned.  
7  
8  
9

## 10 11 12 13 14 **ETHICS AND DISSEMINATION**

15  
16  
17  
18 The College of Medicine Research Ethics Committee (COMREC), Blantyre, Malawi, and the Walter and  
19 Eliza Hall Institute of Medical Research Human Research Ethics Committee, Melbourne, Australia,  
20 approved this study. In addition, an evaluation was done by the Regional Ethics Committee West of  
21 Norway. They advised that the study was not subject to the Norwegian Health Research Act and that  
22 ethical review from this committee was not required. Important protocol modifications such as  
23 changes to eligibility criteria or outcomes are reported to the ethics committees, regulatory  
24 authorities in Malawi, investigators, trial participants, trial registries. Witnessed informed written  
25 consent in English or Chichewa language is obtained from each participant before conducting any  
26 study-related procedure. The study is conducted under The International Conference on  
27 Harmonisation of Technical Requirements for Registration of Pharmaceuticals for Human Use (ICH)  
28 guidelines for “good clinical practice” (GCP) and the Declaration of Helsinki. The results will be  
29 presented to and shared with the local community that hosted and enabled the research, and also to  
30 the international fora. We will publish in peer-reviewed scientific journals and report to relevant  
31 policymaking bodies such as the Malawi Ministry of Health.  
32  
33  
34  
35  
36  
37  
38  
39  
40  
41  
42  
43  
44  
45  
46  
47  
48  
49  
50  
51  
52  
53

## 54 **DISCUSSION**

55  
56 Maternal anaemia prevalence is highest in sub-Saharan Africa and South Asia, and current approaches  
57 to control it are failing. This trial will provide high quality, African-based evidence for clinicians,  
58  
59  
60

1  
2  
3 policymakers and donors on a role for modern IV iron for antenatal anaemia in low-income settings.  
4  
5 This is the largest RCT program assessing new IV iron formulations in pregnancy and is of major  
6  
7 international significance in developing new global guidelines for anaemia in pregnancy. The results  
8  
9 of this study will be disseminated to local and national medical authorities, policymakers, and be  
10  
11 disseminated to the global research community, technical agencies, and international government  
12  
13 bodies via peer-reviewed journals and at international scientific fora.  
14  
15  
16  
17  
18  
19

20 **Author Contributions:**

21  
22 MNM wrote the first draft of the paper. All authors read and approved the final manuscript.  
23  
24  
25

26 **Funding statement:** This study is funded by the Bill & Melinda Gates Foundation OPP1169939.  
27  
28  
29

30 **Acknowledgements:**

31  
32 We acknowledge all the study participants for their willingness to participate in this study. We  
33  
34 appreciate the dedication of the research staff in Blantyre, Zomba and Melbourne. We are grateful  
35  
36 for the support we continue to receive from the District Health Offices in Blantyre and Zomba  
37  
38 districts of Malawi. We acknowledge the collaboration with the Zomba Central Hospital, especially  
39  
40 the office of the Hospital Director. We thank Dr Alinune Kabaghe and Dr Josephine Banda, who  
41  
42 independently packed the trial drugs and delivered them to research sites. We also acknowledge the  
43  
44 Dr Kamiza Histopathology Laboratory for analysing the placental samples.  
45  
46  
47  
48  
49  
50

51 **Competing interests statement.**

52  
53 None to declare.  
54

55 **Word Count:** 4,521  
56  
57  
58  
59  
60

## References

1. World Health Organization. The global prevalence of anaemia in 2011. . In: World Health Organization, ed. Geneva, 2015.
2. Haider BA, Olofin I, Wang M, et al. Anaemia, prenatal iron use, and risk of adverse pregnancy outcomes: Systematic review and meta-analysis. *BMJ (Online)* 2013;347(7916) doi: 10.1136/bmj.f3443
3. Premru-Srsen T, Verdenik I, Ponikvar BM, et al. Infant mortality and causes of death by birth weight for gestational age in non-malformed singleton infants: a 2002-2012 population-based study. *J Perinat Med* 2018;46(5):547-53. doi: 10.1515/jpm-2017-0103 [published Online First: 2017/06/11]
4. World Health Organization, United Nations Children's Fund, United Nations University. Iron Deficiency Anaemia: Assessment, Prevention, and Control. A guide for programme managers. In: Organization. WH, ed. Geneva, 2001.
5. Daru J, Zamora J, Fernandez-Felix BM, et al. Risk of maternal mortality in women with severe anaemia during pregnancy and post partum: a multilevel analysis. *Lancet Glob Health* 2018;6(5):e548-e54. doi: 10.1016/S2214-109X(18)30078-0 [published Online First: 2018/03/25]
6. Peña-Rosas JP, De-Regil LM, Garcia-Casal MN, et al. Daily oral iron supplementation during pregnancy. *Cochrane Database of Systematic Reviews* 2015;2015(7):1-527. doi: 10.1002/14651858.CD004736.pub5
7. Mwangi MN, Roth JM, Smit MR, et al. Effect of Daily Antenatal Iron Supplementation on Plasmodium Infection in Kenyan Women: A Randomized Clinical Trial. *JAMA* 2015;314(10):1009-20. doi: 10.1001/jama.2015.9496 [published Online First: 2015/09/09]
8. World Health Organization. Iron and folate supplementation. Integrated management of pregnancy and childbirth (IMPAC). . In: WHO. Geneva, 2006.
9. World Health Organization. Essential Nutrition Actions: Improving maternal, newborn, infant and young child health and nutrition. . In: WHO. Geneva, 2013.
10. Low MSY, Speedy J, Styles CE, et al. Daily iron supplementation for improving anaemia, iron status and health in menstruating women. *Cochrane Database of Systematic Reviews* 2016;2016(4) doi: 10.1002/14651858.CD009747.pub2
11. National Statistical Office (NSO) [Malawi], ICF International. Malawi Demographic and Health Survey 2015-16: Key Indicators Report. Zomba, Malawi, and Rockville, Maryland, USA.: NSO and ICF International., 2016.
12. Bah A, Pasricha SR, Jallow MW, et al. Serum hepcidin concentrations decline during pregnancy and may identify iron deficiency: Analysis of a longitudinal pregnancy cohort in the Gambia. *Journal of Nutrition* 2017;147(6):1131-37. doi: 10.3945/jn.116.245373
13. Mkandawire P. Gestational Age at First Antenatal Care Visit in Malawi. *Matern Child Health J* 2015;19(11):2366-74. doi: 10.1007/s10995-015-1754-6 [published Online First: 2015/07/15]
14. Friedrichs JR, Cançado RD. Intravenous ferric carboxymaltose for the treatment of iron deficiency anemia. *Revista Brasileira de Hematologia e Hemoterapia* 2015;37(6):400-05. doi: 10.1016/j.bjhh.2015.08.012
15. Pasricha SR, Tye-Din J, Muckenthaler MU, et al. Iron deficiency. *Lancet* 2020 doi: 10.1016/S0140-6736(20)32594-0 [published Online First: 2020/12/08]
16. Shand AW, Bell J, Henry A, et al. Rapid increase in intravenous iron therapy for women of reproductive age in Australia. *Med J Aust* 2020 doi: 10.5694/mja2.50618 [published Online First: 2020/05/27]

17. Qassim A, Grivell RM, Henry A, et al. Intravenous or oral iron for treating iron deficiency anaemia during pregnancy: systematic review and meta-analysis. *Med J Aust* 2019;211(8):367-73. doi: 10.5694/mja2.50308 [published Online First: 2019/08/24]
18. Achebe MM, Gafter-Gvili A. How I treat anemia in pregnancy: iron, cobalamin, and folate. *Blood* 2017;129(8):940-49. doi: 10.1182/blood-2016-08-672246 [published Online First: 2016/12/31]
19. Prevalence of low birthweight babies (% of births) - Malawi Washington DC: World Bank; 2021 [Available from: <https://data.worldbank.org/indicator/SH.STA.BRTW.ZS?locations=MW> accessed 18th March 2021.
20. Boudova S, Divala T, Mawindo P, et al. The prevalence of malaria at first antenatal visit in Blantyre, Malawi declined following a universal bed net campaign. *Malar J* 2015;14:422. doi: 10.1186/s12936-015-0945-3 [published Online First: 2015/10/30]
21. Haider BA, Olofin I, Wang M, et al. Anaemia, prenatal iron use, and risk of adverse pregnancy outcomes: systematic review and meta-analysis. *BMJ* 2013;346:f3443. doi: 10.1136/bmj.f3443
22. Bah A, Pasricha SR, Jallow MW, et al. Serum Hepcidin Concentrations Decline during Pregnancy and May Identify Iron Deficiency: Analysis of a Longitudinal Pregnancy Cohort in The Gambia. *J Nutr* 2017;147(6):1131-37. doi: 10.3945/jn.116.245373
23. Breymann C, Milman N, Mezzacasa A, et al. Ferric carboxymaltose vs. oral iron in the treatment of pregnant women with iron deficiency anemia: an international, open-label, randomized controlled trial (FER-ASAP). *J Perinat Med* 2017;45(4):443-53. doi: 10.1515/jpm-2016-0050 [published Online First: 2016/06/10]
24. Liang K-Y, Zeger SL. Longitudinal data analysis of continuous and discrete responses for pre-post designs. *Sankhyā: The Indian Journal of Statistics, Series B* 2000;62(1):134-48. doi: <https://www.jstor.org/stable/25053123>



1  
2  
3  
4  
5 **Figure heading, caption and legend**  
6  
7

8 **Figure 1**  
9

10 **Figure caption and legend:** REVAMP Trial schema. V0 – visit 0; V1 – Visit 1; V2 – Visit 2; V4 – Visit 4; V7 – Visit 7;  
11  
12 V8 – Visit 8; Abbreviations: iv – Intravenous; wks – weeks.  
13  
14  
15  
16  
17  
18  
19  
20  
21  
22  
23  
24  
25  
26  
27  
28  
29  
30  
31  
32  
33  
34  
35  
36  
37  
38  
39  
40  
41  
42  
43  
44  
45  
46  
47  
48  
49  
50  
51  
52  
53  
54  
55  
56  
57  
58  
59  
60

For peer review only

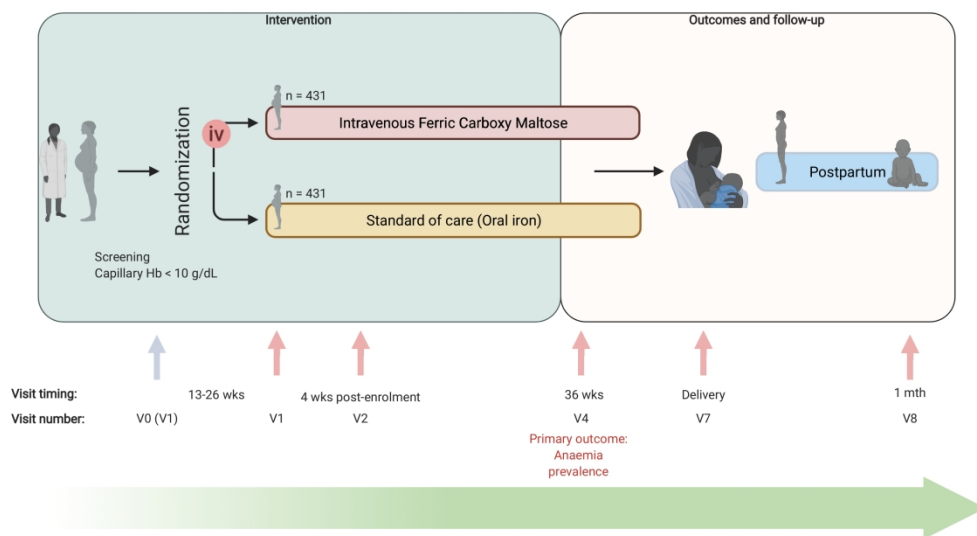

Figure 1: REVAMP Trial schema. V0 – visit 0; V1 – Visit 1; V2 – Visit 2; V4 – Visit 4; V7 – Visit 7; V8 – Visit 8; Abbreviations: iv – Intravenous; wks – weeks.

# Reporting checklist for protocol of a clinical trial.

Based on the SPIRIT guidelines.

## Instructions to authors

Complete this checklist by entering the page numbers from your manuscript where readers will find each of the items listed below.

Your article may not currently address all the items on the checklist. Please modify your text to include the missing information. If you are certain that an item does not apply, please write "n/a" and provide a short explanation.

Upload your completed checklist as an extra file when you submit to a journal.

In your methods section, say that you used the SPIRIT reporting guidelines, and cite them as:

Chan A-W, Tetzlaff JM, Gøtzsche PC, Altman DG, Mann H, Berlin J, Dickersin K, Hróbjartsson A, Schulz KF, Parulekar WR, Krleža-Jerić K, Laupacis A, Moher D. SPIRIT 2013 Explanation and Elaboration: Guidance for protocols of clinical trials. *BMJ*. 2013;346:e7586

|                                                         | Reporting Item                                                                                                                                | Page Number |
|---------------------------------------------------------|-----------------------------------------------------------------------------------------------------------------------------------------------|-------------|
| <b>Administrative information</b>                       |                                                                                                                                               |             |
| Title                                                   | <a href="#">#1</a> Descriptive title identifying the study design, population, interventions, and, if applicable, trial acronym               | 1           |
| Trial registration                                      | <a href="#">#2a</a> Trial identifier and registry name. If not yet registered, name of intended registry                                      | 2 & 4       |
| Trial registration: data set                            | <a href="#">#2b</a> All items from the World Health Organization Trial Registration Data Set                                                  | 4           |
| Protocol version                                        | <a href="#">#3</a> Date and version identifier                                                                                                | 4           |
| Funding                                                 | <a href="#">#4</a> Sources and types of financial, material, and other support                                                                | 26          |
| Roles and responsibilities: contributorship             | <a href="#">#5a</a> Names, affiliations, and roles of protocol contributors                                                                   | 1 & 2       |
| Roles and responsibilities: sponsor contact information | <a href="#">#5b</a> Name and contact information for the trial sponsor                                                                        | 4           |
| Roles and responsibilities:                             | <a href="#">#5c</a> Role of study sponsor and funders, if any, in study design; collection, management, analysis, and interpretation of data; | 4           |

|    |                                                           |                      |                                                                    |       |
|----|-----------------------------------------------------------|----------------------|--------------------------------------------------------------------|-------|
| 1  | sponsor and funder                                        |                      | writing of the report; and the decision to submit the report for   |       |
| 2  |                                                           |                      | publication, including whether they will have ultimate authority   |       |
| 3  |                                                           |                      | over any of these activities                                       |       |
| 4  |                                                           |                      |                                                                    |       |
| 5  | Roles and                                                 | <a href="#">#5d</a>  | Composition, roles, and responsibilities of the coordinating       | 19    |
| 6  | responsibilities:                                         |                      | centre, steering committee, endpoint adjudication committee,       |       |
| 7  | committees                                                |                      | data management team, and other individuals or groups              |       |
| 8  |                                                           |                      | overseeing the trial, if applicable (see Item 21a for data         |       |
| 9  |                                                           |                      | monitoring committee)                                              |       |
| 10 |                                                           |                      |                                                                    |       |
| 11 |                                                           |                      |                                                                    |       |
| 12 |                                                           |                      |                                                                    |       |
| 13 | <b>Introduction</b>                                       |                      |                                                                    |       |
| 14 |                                                           |                      |                                                                    |       |
| 15 | Background and                                            | <a href="#">#6a</a>  | Description of research question and justification for undertaking | 7     |
| 16 | rationale                                                 |                      | the trial, including summary of relevant studies (published and    |       |
| 17 |                                                           |                      | unpublished) examining benefits and harms for each intervention    |       |
| 18 |                                                           |                      |                                                                    |       |
| 19 |                                                           |                      |                                                                    |       |
| 20 | Background and                                            | <a href="#">#6b</a>  | Explanation for choice of comparators                              | 20    |
| 21 | rationale: choice of                                      |                      |                                                                    |       |
| 22 | comparators                                               |                      |                                                                    |       |
| 23 |                                                           |                      |                                                                    |       |
| 24 |                                                           |                      |                                                                    |       |
| 25 | Objectives                                                | <a href="#">#7</a>   | Specific objectives or hypotheses                                  | 9,10  |
| 26 |                                                           |                      |                                                                    |       |
| 27 | Trial design                                              | <a href="#">#8</a>   | Description of trial design including type of trial (eg, parallel  | 10    |
| 28 |                                                           |                      | group, crossover, factorial, single group), allocation ratio, and  |       |
| 29 |                                                           |                      | framework (eg, superiority, equivalence, non-inferiority,          |       |
| 30 |                                                           |                      | exploratory)                                                       |       |
| 31 |                                                           |                      |                                                                    |       |
| 32 |                                                           |                      |                                                                    |       |
| 33 | <b>Methods: Participants, interventions, and outcomes</b> |                      |                                                                    |       |
| 34 |                                                           |                      |                                                                    |       |
| 35 | Study setting                                             | <a href="#">#9</a>   | Description of study settings (eg, community clinic, academic      | 10,11 |
| 36 |                                                           |                      | hospital) and list of countries where data will be collected.      |       |
| 37 |                                                           |                      | Reference to where list of study sites can be obtained             |       |
| 38 |                                                           |                      |                                                                    |       |
| 39 |                                                           |                      |                                                                    |       |
| 40 | Eligibility criteria                                      | <a href="#">#10</a>  | Inclusion and exclusion criteria for participants. If applicable,  | 11,12 |
| 41 |                                                           |                      | eligibility criteria for study centres and individuals who will    |       |
| 42 |                                                           |                      | perform the interventions (eg, surgeons, psychotherapists)         |       |
| 43 |                                                           |                      |                                                                    |       |
| 44 |                                                           |                      |                                                                    |       |
| 45 | Interventions:                                            | <a href="#">#11a</a> | Interventions for each group with sufficient detail to allow       | 12,13 |
| 46 | description                                               |                      | replication, including how and when they will be administered      |       |
| 47 |                                                           |                      |                                                                    |       |
| 48 |                                                           |                      |                                                                    |       |
| 49 | Interventions:                                            | <a href="#">#11b</a> | Criteria for discontinuing or modifying allocated interventions    | 13    |
| 50 | modifications                                             |                      | for a given trial participant (eg, drug dose change in response to |       |
| 51 |                                                           |                      | harms, participant request, or improving / worsening disease)      |       |
| 52 |                                                           |                      |                                                                    |       |
| 53 |                                                           |                      |                                                                    |       |
| 54 | Interventions:                                            | <a href="#">#11c</a> | Strategies to improve adherence to intervention protocols, and     | 13    |
| 55 | adherence                                                 |                      | any procedures for monitoring adherence (eg, drug tablet return;   |       |
| 56 |                                                           |                      | laboratory tests)                                                  |       |
| 57 |                                                           |                      |                                                                    |       |
| 58 |                                                           |                      |                                                                    |       |
| 59 |                                                           |                      |                                                                    |       |
| 60 |                                                           |                      |                                                                    |       |

|    |                  |                      |                                                                  |        |
|----|------------------|----------------------|------------------------------------------------------------------|--------|
| 1  | Interventions:   | <a href="#">#11d</a> | Relevant concomitant care and interventions that are permitted   | 13     |
| 2  | concomitant care |                      | or prohibited during the trial                                   |        |
| 3  |                  |                      |                                                                  |        |
| 4  | Outcomes         | <a href="#">#12</a>  | Primary, secondary, and other outcomes, including the specific   | 21     |
| 5  |                  |                      | measurement variable (eg, systolic blood pressure), analysis     |        |
| 6  |                  |                      | metric (eg, change from baseline, final value, time to event),   |        |
| 7  |                  |                      | method of aggregation (eg, median, proportion), and time point   |        |
| 8  |                  |                      | for each outcome. Explanation of the clinical relevance of       |        |
| 9  |                  |                      | chosen efficacy and harm outcomes is strongly recommended        |        |
| 10 |                  |                      |                                                                  |        |
| 11 |                  |                      |                                                                  |        |
| 12 |                  |                      |                                                                  |        |
| 13 | Participant      | <a href="#">#13</a>  | Time schedule of enrolment, interventions (including any run-ins | 10,18, |
| 14 | timeline         |                      | and washouts), assessments, and visits for participants. A       |        |
| 15 |                  |                      | schematic diagram is highly recommended (see Figure)             | 19,20  |
| 16 |                  |                      |                                                                  |        |
| 17 |                  |                      |                                                                  |        |
| 18 | Sample size      | <a href="#">#14</a>  | Estimated number of participants needed to achieve study         | 22, 23 |
| 19 |                  |                      | objectives and how it was determined, including clinical and     |        |
| 20 |                  |                      | statistical assumptions supporting any sample size calculations  |        |
| 21 |                  |                      |                                                                  |        |
| 22 |                  |                      |                                                                  |        |
| 23 | Recruitment      | <a href="#">#15</a>  | Strategies for achieving adequate participant enrolment to reach | 18     |
| 24 |                  |                      | target sample size                                               |        |
| 25 |                  |                      |                                                                  |        |
| 26 |                  |                      |                                                                  |        |

#### 27 **Methods: Assignment of interventions (for controlled trials)**

|    |                    |                      |                                                                    |       |
|----|--------------------|----------------------|--------------------------------------------------------------------|-------|
| 28 |                    |                      |                                                                    |       |
| 29 | Allocation:        | <a href="#">#16a</a> | Method of generating the allocation sequence (eg, computer-        | 13    |
| 30 | sequence           |                      | generated random numbers), and list of any factors for             |       |
| 31 | generation         |                      | stratification. To reduce predictability of a random sequence,     |       |
| 32 |                    |                      | details of any planned restriction (eg, blocking) should be        |       |
| 33 |                    |                      | provided in a separate document that is unavailable to those who   |       |
| 34 |                    |                      | enrol participants or assign interventions                         |       |
| 35 |                    |                      |                                                                    |       |
| 36 |                    |                      |                                                                    |       |
| 37 |                    |                      |                                                                    |       |
| 38 | Allocation         | <a href="#">#16b</a> | Mechanism of implementing the allocation sequence (eg, central     | 13    |
| 39 | concealment        |                      | telephone; sequentially numbered, opaque, sealed envelopes),       |       |
| 40 | mechanism          |                      | describing any steps to conceal the sequence until interventions   |       |
| 41 |                    |                      | are assigned                                                       |       |
| 42 |                    |                      |                                                                    |       |
| 43 |                    |                      |                                                                    |       |
| 44 | Allocation:        | <a href="#">#16c</a> | Who will generate the allocation sequence, who will enrol          | 13    |
| 45 | implementation     |                      | participants, and who will assign participants to interventions    |       |
| 46 |                    |                      |                                                                    |       |
| 47 |                    |                      |                                                                    |       |
| 48 | Blinding (masking) | <a href="#">#17a</a> | Who will be blinded after assignment to interventions (eg, trial   | 13,14 |
| 49 |                    |                      | participants, care providers, outcome assessors, data analysts),   |       |
| 50 |                    |                      | and how                                                            |       |
| 51 |                    |                      |                                                                    |       |
| 52 |                    |                      |                                                                    |       |
| 53 | Blinding           | <a href="#">#17b</a> | If blinded, circumstances under which unblinding is permissible,   | 13,14 |
| 54 | (masking):         |                      | and procedure for revealing a participant's allocated intervention |       |
| 55 | emergency          |                      | during the trial                                                   |       |
| 56 | unblinding         |                      |                                                                    |       |
| 57 |                    |                      |                                                                    |       |
| 58 |                    |                      |                                                                    |       |
| 59 |                    |                      |                                                                    |       |

## 1 **Methods: Data collection, management, and analysis**

|    |                      |                      |                                                                                 |
|----|----------------------|----------------------|---------------------------------------------------------------------------------|
| 2  |                      |                      |                                                                                 |
| 3  | Data collection      | <a href="#">#18a</a> | Plans for assessment and collection of outcome, baseline, and 20                |
| 4  | plan                 |                      | other trial data, including any related processes to promote data               |
| 5  |                      |                      | quality (eg, duplicate measurements, training of assessors) and a               |
| 6  |                      |                      | description of study instruments (eg, questionnaires, laboratory                |
| 7  |                      |                      | tests) along with their reliability and validity, if known.                     |
| 8  |                      |                      | Reference to where data collection forms can be found, if not in                |
| 9  |                      |                      | the protocol                                                                    |
| 10 |                      |                      |                                                                                 |
| 11 | Data collection      | <a href="#">#18b</a> | Plans to promote participant retention and complete follow-up, 20,21            |
| 12 | plan: retention      |                      | including list of any outcome data to be collected for participants             |
| 13 |                      |                      | who discontinue or deviate from intervention protocols                          |
| 14 |                      |                      |                                                                                 |
| 15 | Data management      | <a href="#">#19</a>  | Plans for data entry, coding, security, and storage, including any 24           |
| 16 |                      |                      | related processes to promote data quality (eg, double data entry;               |
| 17 |                      |                      | range checks for data values). Reference to where details of data               |
| 18 |                      |                      | management procedures can be found, if not in the protocol                      |
| 19 |                      |                      |                                                                                 |
| 20 | Statistics:          | <a href="#">#20a</a> | Statistical methods for analysing primary and secondary 23                      |
| 21 | outcomes             |                      | outcomes. Reference to where other details of the statistical                   |
| 22 |                      |                      | analysis plan can be found, if not in the protocol                              |
| 23 |                      |                      |                                                                                 |
| 24 | Statistics:          | <a href="#">#20b</a> | Methods for any additional analyses (eg, subgroup and adjusted n/a: statistical |
| 25 | additional analyses  |                      | analyses) analysis plan to                                                      |
| 26 |                      |                      | be published                                                                    |
| 27 |                      |                      | separately                                                                      |
| 28 |                      |                      |                                                                                 |
| 29 | Statistics: analysis | <a href="#">#20c</a> | Definition of analysis population relating to protocol non- 23 (SAP to be       |
| 30 | population and       |                      | adherence (eg, as randomised analysis), and any statistical published           |
| 31 | missing data         |                      | methods to handle missing data (eg, multiple imputation) separately)            |
| 32 |                      |                      |                                                                                 |
| 33 |                      |                      |                                                                                 |
| 34 |                      |                      |                                                                                 |
| 35 |                      |                      |                                                                                 |
| 36 |                      |                      |                                                                                 |
| 37 |                      |                      |                                                                                 |
| 38 |                      |                      |                                                                                 |
| 39 |                      |                      |                                                                                 |
| 40 |                      |                      |                                                                                 |

## 41 **Methods:**

## 42 **Monitoring**

|    |                  |                      |                                                                          |
|----|------------------|----------------------|--------------------------------------------------------------------------|
| 43 |                  |                      |                                                                          |
| 44 | Data monitoring: | <a href="#">#21a</a> | Composition of data monitoring committee (DMC); summary of 19            |
| 45 | formal committee |                      | its role and reporting structure; statement of whether it is             |
| 46 |                  |                      | independent from the sponsor and competing interests; and                |
| 47 |                  |                      | reference to where further details about its charter can be found,       |
| 48 |                  |                      | if not in the protocol. Alternatively, an explanation of why a           |
| 49 |                  |                      | DMC is not needed                                                        |
| 50 |                  |                      |                                                                          |
| 51 | Data monitoring: | <a href="#">#21b</a> | Description of any interim analyses and stopping guidelines, 23,24       |
| 52 | interim analysis |                      | including who will have access to these interim results and make         |
| 53 |                  |                      | the final decision to terminate the trial                                |
| 54 |                  |                      |                                                                          |
| 55 | Harms            | <a href="#">#22</a>  | Plans for collecting, assessing, reporting, and managing solicited 21,22 |
| 56 |                  |                      |                                                                          |
| 57 |                  |                      |                                                                          |
| 58 |                  |                      |                                                                          |
| 59 |                  |                      |                                                                          |
| 60 |                  |                      |                                                                          |

and spontaneously reported adverse events and other unintended effects of trial interventions or trial conduct

|    |                                      |                      |                                                                                                                                                                                                                                                                                          |
|----|--------------------------------------|----------------------|------------------------------------------------------------------------------------------------------------------------------------------------------------------------------------------------------------------------------------------------------------------------------------------|
| 1  |                                      |                      |                                                                                                                                                                                                                                                                                          |
| 2  |                                      |                      |                                                                                                                                                                                                                                                                                          |
| 3  |                                      |                      |                                                                                                                                                                                                                                                                                          |
| 4  | Auditing                             | <a href="#">#23</a>  | Frequency and procedures for auditing trial conduct, if any, and whether the process will be independent from investigators and the sponsor 19                                                                                                                                           |
| 5  |                                      |                      |                                                                                                                                                                                                                                                                                          |
| 6  |                                      |                      |                                                                                                                                                                                                                                                                                          |
| 7  |                                      |                      |                                                                                                                                                                                                                                                                                          |
| 8  |                                      |                      |                                                                                                                                                                                                                                                                                          |
| 9  | <b>Ethics and dissemination</b>      |                      |                                                                                                                                                                                                                                                                                          |
| 10 |                                      |                      |                                                                                                                                                                                                                                                                                          |
| 11 | Research ethics approval             | <a href="#">#24</a>  | Plans for seeking research ethics committee / institutional review board (REC / IRB) approval 4                                                                                                                                                                                          |
| 12 |                                      |                      |                                                                                                                                                                                                                                                                                          |
| 13 |                                      |                      |                                                                                                                                                                                                                                                                                          |
| 14 | Protocol amendments                  | <a href="#">#25</a>  | Plans for communicating important protocol modifications (eg, changes to eligibility criteria, outcomes, analyses) to relevant parties (eg, investigators, REC / IRBs, trial participants, trial registries, journals, regulators) 4                                                     |
| 15 |                                      |                      |                                                                                                                                                                                                                                                                                          |
| 16 |                                      |                      |                                                                                                                                                                                                                                                                                          |
| 17 |                                      |                      |                                                                                                                                                                                                                                                                                          |
| 18 |                                      |                      |                                                                                                                                                                                                                                                                                          |
| 19 |                                      |                      |                                                                                                                                                                                                                                                                                          |
| 20 |                                      |                      |                                                                                                                                                                                                                                                                                          |
| 21 | Consent or assent                    | <a href="#">#26a</a> | Who will obtain informed consent or assent from potential trial participants or authorised surrogates, and how (see Item 32) See supplementary material 1                                                                                                                                |
| 22 |                                      |                      |                                                                                                                                                                                                                                                                                          |
| 23 |                                      |                      |                                                                                                                                                                                                                                                                                          |
| 24 |                                      |                      |                                                                                                                                                                                                                                                                                          |
| 25 |                                      |                      |                                                                                                                                                                                                                                                                                          |
| 26 | Consent or assent: ancillary studies | <a href="#">#26b</a> | Additional consent provisions for collection and use of participant data and biological specimens in ancillary studies, if applicable See supp. Material 1                                                                                                                               |
| 27 |                                      |                      |                                                                                                                                                                                                                                                                                          |
| 28 |                                      |                      |                                                                                                                                                                                                                                                                                          |
| 29 |                                      |                      |                                                                                                                                                                                                                                                                                          |
| 30 |                                      |                      |                                                                                                                                                                                                                                                                                          |
| 31 | Confidentiality                      | <a href="#">#27</a>  | How personal information about potential and enrolled participants will be collected, shared, and maintained in order to protect confidentiality before, during, and after the trial 23,24                                                                                               |
| 32 |                                      |                      |                                                                                                                                                                                                                                                                                          |
| 33 |                                      |                      |                                                                                                                                                                                                                                                                                          |
| 34 |                                      |                      |                                                                                                                                                                                                                                                                                          |
| 35 |                                      |                      |                                                                                                                                                                                                                                                                                          |
| 36 | Declaration of interests             | <a href="#">#28</a>  | Financial and other competing interests for principal investigators for the overall trial and each study site 25                                                                                                                                                                         |
| 37 |                                      |                      |                                                                                                                                                                                                                                                                                          |
| 38 |                                      |                      |                                                                                                                                                                                                                                                                                          |
| 39 |                                      |                      |                                                                                                                                                                                                                                                                                          |
| 40 | Data access                          | <a href="#">#29</a>  | Statement of who will have access to the final trial dataset, and disclosure of contractual agreements that limit such access for investigators 23,24                                                                                                                                    |
| 41 |                                      |                      |                                                                                                                                                                                                                                                                                          |
| 42 |                                      |                      |                                                                                                                                                                                                                                                                                          |
| 43 |                                      |                      |                                                                                                                                                                                                                                                                                          |
| 44 | Ancillary and post trial care        | <a href="#">#30</a>  | Provisions, if any, for ancillary and post-trial care, and for compensation to those who suffer harm from trial participation 21                                                                                                                                                         |
| 45 |                                      |                      |                                                                                                                                                                                                                                                                                          |
| 46 |                                      |                      |                                                                                                                                                                                                                                                                                          |
| 47 |                                      |                      |                                                                                                                                                                                                                                                                                          |
| 48 | Dissemination policy: trial results  | <a href="#">#31a</a> | Plans for investigators and sponsor to communicate trial results to participants, healthcare professionals, the public, and other relevant groups (eg, via publication, reporting in results databases, or other data sharing arrangements), including any publication restrictions 8,24 |
| 49 |                                      |                      |                                                                                                                                                                                                                                                                                          |
| 50 |                                      |                      |                                                                                                                                                                                                                                                                                          |
| 51 |                                      |                      |                                                                                                                                                                                                                                                                                          |
| 52 |                                      |                      |                                                                                                                                                                                                                                                                                          |
| 53 |                                      |                      |                                                                                                                                                                                                                                                                                          |
| 54 |                                      |                      |                                                                                                                                                                                                                                                                                          |
| 55 | Dissemination policy: authorship     | <a href="#">#31b</a> | Authorship eligibility guidelines and any intended use of professional writers 24                                                                                                                                                                                                        |
| 56 |                                      |                      |                                                                                                                                                                                                                                                                                          |
| 57 |                                      |                      |                                                                                                                                                                                                                                                                                          |
| 58 |                                      |                      |                                                                                                                                                                                                                                                                                          |
| 59 |                                      |                      |                                                                                                                                                                                                                                                                                          |
| 60 |                                      |                      |                                                                                                                                                                                                                                                                                          |

1 Dissemination [#31c](#) Plans, if any, for granting public access to the full protocol, n/a; statistical  
 2 policy: participant-level dataset, and statistical code analyses plan to  
 3 reproducible be published  
 4 research separately  
 5  
 6

## 7 Appendices

9 Informed consent [#32](#) Model consent form and other related documentation given to Supplementary  
 10 materials participants and authorised surrogates material 1  
 11  
 12

13 Biological [#33](#) Plans for collection, laboratory evaluation, and storage of 14,15, 16  
 14 specimens biological specimens for genetic or molecular analysis in the  
 15 current trial and for future use in ancillary studies, if applicable  
 16  
 17

18 None The SPIRIT Explanation and Elaboration paper is distributed under the terms of the Creative Commons Attribution  
 19 License CC-BY-NC. This checklist can be completed online using <https://www.goodreports.org/>, a tool made by the  
 20 EQUATOR Network in collaboration with [Penelope.ai](http://Penelope.ai)  
 21  
 22  
 23  
 24  
 25  
 26  
 27  
 28  
 29  
 30  
 31  
 32  
 33  
 34  
 35  
 36  
 37  
 38  
 39  
 40  
 41  
 42  
 43  
 44  
 45  
 46  
 47  
 48  
 49  
 50  
 51  
 52  
 53  
 54  
 55  
 56  
 57  
 58  
 59  
 60



# BMJ Open

## Protocol for a multicentre, parallel-group, open-label randomised controlled trial comparing ferric carboxymaltose with the standard of care in anaemic Malawian pregnant women – The REVAMP trial

|                               |                                                                                                                                                                                                                                                                                                                                                                                                                                                                                                                                                                                                                                                                                                                                                                                                                                                                                                                                                                                                                                                                                                                                                                                                                                                                                                                                                                                                                                                                                                                                                                                                                                                                                                                                                                                                                                                                                                                                                                                                                                                                                                                                                                                                                                                                                                                                                                                                                   |
|-------------------------------|-------------------------------------------------------------------------------------------------------------------------------------------------------------------------------------------------------------------------------------------------------------------------------------------------------------------------------------------------------------------------------------------------------------------------------------------------------------------------------------------------------------------------------------------------------------------------------------------------------------------------------------------------------------------------------------------------------------------------------------------------------------------------------------------------------------------------------------------------------------------------------------------------------------------------------------------------------------------------------------------------------------------------------------------------------------------------------------------------------------------------------------------------------------------------------------------------------------------------------------------------------------------------------------------------------------------------------------------------------------------------------------------------------------------------------------------------------------------------------------------------------------------------------------------------------------------------------------------------------------------------------------------------------------------------------------------------------------------------------------------------------------------------------------------------------------------------------------------------------------------------------------------------------------------------------------------------------------------------------------------------------------------------------------------------------------------------------------------------------------------------------------------------------------------------------------------------------------------------------------------------------------------------------------------------------------------------------------------------------------------------------------------------------------------|
| Journal:                      | <i>BMJ Open</i>                                                                                                                                                                                                                                                                                                                                                                                                                                                                                                                                                                                                                                                                                                                                                                                                                                                                                                                                                                                                                                                                                                                                                                                                                                                                                                                                                                                                                                                                                                                                                                                                                                                                                                                                                                                                                                                                                                                                                                                                                                                                                                                                                                                                                                                                                                                                                                                                   |
| Manuscript ID                 | bmjopen-2021-053288.R1                                                                                                                                                                                                                                                                                                                                                                                                                                                                                                                                                                                                                                                                                                                                                                                                                                                                                                                                                                                                                                                                                                                                                                                                                                                                                                                                                                                                                                                                                                                                                                                                                                                                                                                                                                                                                                                                                                                                                                                                                                                                                                                                                                                                                                                                                                                                                                                            |
| Article Type:                 | Protocol                                                                                                                                                                                                                                                                                                                                                                                                                                                                                                                                                                                                                                                                                                                                                                                                                                                                                                                                                                                                                                                                                                                                                                                                                                                                                                                                                                                                                                                                                                                                                                                                                                                                                                                                                                                                                                                                                                                                                                                                                                                                                                                                                                                                                                                                                                                                                                                                          |
| Date Submitted by the Author: | 25-Aug-2021                                                                                                                                                                                                                                                                                                                                                                                                                                                                                                                                                                                                                                                                                                                                                                                                                                                                                                                                                                                                                                                                                                                                                                                                                                                                                                                                                                                                                                                                                                                                                                                                                                                                                                                                                                                                                                                                                                                                                                                                                                                                                                                                                                                                                                                                                                                                                                                                       |
| Complete List of Authors:     | <p>Mwangi, Martin; University of Malawi College of Medicine, Training and Research Unit of Excellence (TRUE); University of Malawi College of Medicine, School of Public Health and Family Medicine, Department of Public Health</p> <p>Mzembe, Glory; University of Malawi College of Medicine, Training and Research Unit of Excellence (TRUE); University of Malawi College of Medicine, School of Public Health and Family Medicine, Department of Public Health</p> <p>Moya, Ernest; University of Malawi College of Medicine, Training and Research Unit of Excellence (TRUE); University of Malawi College of Medicine, School of Public Health and Family Medicine, Department of Public Health</p> <p>Braat, Sabine ; University of Melbourne School of Population and Global Health, Centre for Epidemiology and Biostatistics; The University of Melbourne Melbourne Medical School, Department of Infectious Diseases</p> <p>Harding, Rebecca; The Walter and Eliza Hall Institute of Medical Research, Population Health and Immunity Division,</p> <p>Robberstad, Bjarne; University of Bergen, Department of Global Public Health and Primary Care</p> <p>Simpson, Julie; University of Melbourne School of Population and Global Health, Centre for Epidemiology and Biostatistics</p> <p>Stones, William; University of Malawi, Obstetrics &amp; Gynaecology</p> <p>Rogerson, Stephen; University of Melbourne, Department of Medicine at the Peter Doherty Institute for Infection and Immunity; The University of Melbourne Melbourne Medical School, Department of Infectious Diseases</p> <p>Biselele, Kabeya; Zomba Central Hospital</p> <p>Chinkhumba, Jobiba; University of Malawi College of Medicine, Malaria Alert Centre</p> <p>Larson, Leila; University of South Carolina Arnold School of Public Health, Department of Health Promotion, Education, and Behavior</p> <p>Ataide, Ricardo; The Walter and Eliza Hall Institute of Medical Research, Population Health and Immunity Division; The University of Melbourne, Department of Infectious Diseases</p> <p>Phiri, Kamija; University of Malawi College of Medicine, Training and Research Unit of Excellence (TRUE); University of Malawi College of Medicine, School of Public Health and Family Medicine, Department of Public Health</p> <p>Pasricha, Sant-Rayn; Walter and Eliza Hall Institute of Medical Research,</p> |

|                                    |                                                                                                                                                                           |
|------------------------------------|---------------------------------------------------------------------------------------------------------------------------------------------------------------------------|
|                                    | Population Health and Immunity Division; The Royal Melbourne Hospital, Diagnostic Haematology and Clinical Haematology, The Peter MacCallum Cancer Centre                 |
| <b>Primary Subject Heading</b> :   | Haematology (incl blood transfusion)                                                                                                                                      |
| <b>Secondary Subject Heading</b> : | Global health, Haematology (incl blood transfusion), Nutrition and metabolism, Public health, Infectious diseases                                                         |
| <b>Keywords</b> :                  | Anaemia < HAEMATOLOGY, Nutrition < TROPICAL MEDICINE, Epidemiology < TROPICAL MEDICINE, Clinical trials < THERAPEUTICS, PUBLIC HEALTH, Epidemiology < INFECTIOUS DISEASES |
|                                    |                                                                                                                                                                           |

SCHOLARONE™  
Manuscripts

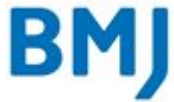

I, the Submitting Author has the right to grant and does grant on behalf of all authors of the Work (as defined in the below author licence), an exclusive licence and/or a non-exclusive licence for contributions from authors who are: i) UK Crown employees; ii) where BMJ has agreed a CC-BY licence shall apply, and/or iii) in accordance with the terms applicable for US Federal Government officers or employees acting as part of their official duties; on a worldwide, perpetual, irrevocable, royalty-free basis to BMJ Publishing Group Ltd ("BMJ") its licensees and where the relevant Journal is co-owned by BMJ to the co-owners of the Journal, to publish the Work in this journal and any other BMJ products and to exploit all rights, as set out in our [licence](#).

The Submitting Author accepts and understands that any supply made under these terms is made by BMJ to the Submitting Author unless you are acting as an employee on behalf of your employer or a postgraduate student of an affiliated institution which is paying any applicable article publishing charge ("APC") for Open Access articles. Where the Submitting Author wishes to make the Work available on an Open Access basis (and intends to pay the relevant APC), the terms of reuse of such Open Access shall be governed by a Creative Commons licence – details of these licences and which [Creative Commons](#) licence will apply to this Work are set out in our licence referred to above.

Other than as permitted in any relevant BMJ Author's Self Archiving Policies, I confirm this Work has not been accepted for publication elsewhere, is not being considered for publication elsewhere and does not duplicate material already published. I confirm all authors consent to publication of this Work and authorise the granting of this licence.

1  
2  
3  
4  
5 **Protocol for a multicentre, parallel-group, open-label randomised controlled trial comparing ferric**  
6 **carboxymaltose with the standard of care in anaemic Malawian pregnant women – The REVAMP**  
7 **trial**  
8  
9  
10  
11  
12  
13  
14

15 **Authors**

16 Martin N Mwangi<sup>1,2</sup>, Glory Mzembe<sup>1,2</sup>, Ernest Moya<sup>1,2</sup>, Sabine Braat<sup>3,4,5</sup>, Rebecca Harding<sup>3</sup>, Bjarne  
17 Robberstad<sup>6</sup>, Julie Simpson<sup>5</sup>, William Stones<sup>2</sup>, Stephen Rogerson<sup>4,7</sup>, Kabeya Biselele<sup>8</sup>, Jobiba  
18 Chinkhumba<sup>9</sup>, Leila Larson<sup>10</sup>, Ricardo Ataíde<sup>3,4</sup>, Kamija S Phiri<sup>1,2</sup>, Sant-Rayn Pasricha<sup>3,11,12</sup>  
19  
20  
21  
22  
23  
24  
25  
26  
27

28 **Institutions**

- 29  
30  
31  
32  
33  
34  
35  
36  
37  
38  
39  
40  
41  
42  
43  
44  
45  
46  
47  
48  
49  
50  
51  
52  
53  
54  
55  
56  
57  
58  
59  
60
1. Training and Research Unit of Excellence (TRUE), Mandala, No. 1 Kufa Road, Chichiri, BT3, Blantyre, Malawi.
  2. School of Public Health and Family Medicine, Department of Public Health, Kamuzu University of Health Sciences (KUHeS), Chichiri, BT3, Blantyre, Malawi.
  3. Population Health and Immunity Division, The Walter and Eliza Hall Institute of Medical Research, 1G Royal Parade, Parkville, Melbourne 3052, Australia.
  4. Department of Infectious Diseases, Melbourne Medical School, The University of Melbourne, Melbourne, Australia.
  5. Centre for Epidemiology and Biostatistics, Melbourne School of Population and Global Health, The University of Melbourne, Melbourne, Australia.
  6. Department of Global Public Health and Primary Care, University of Bergen, Bergen, Norway.
  7. Department of Medicine at the Peter Doherty Institute for Infection and Immunity, University of Melbourne, Melbourne, Australia.
  8. Zomba Central Hospital, Department of Obstetrics and Gynecology, Zomba, Malawi.

- 1
- 2
- 3 9. Malaria Alert Centre, Kamuzu University of Health Sciences (KUHeS), Chichiri, BT3, Blantyre,
- 4
- 5 Malawi.
- 6
- 7
- 8 10. Department of Health Promotion, Education, and Behaviour, Arnold School of Public Health,
- 9
- 10 University of South Carolina, Columbia, South Carolina, USA.
- 11
- 12 11. Diagnostic Haematology, The Royal Melbourne Hospital; and Clinical Haematology, The Peter
- 13
- 14 MacCallum Cancer Centre and The Royal Melbourne Hospital, Parkville VIC 3050 Australia.
- 15
- 16 12. Department of Medical Biology, Faculty of Medicine, Dentistry and Health Sciences, The
- 17
- 18 University of Melbourne, Melbourne, Australia.
- 19
- 20
- 21
- 22

23 **Protocol registry number:** ACTRN12618001268235

24

25

26

27

28 **Corresponding author:**

29

30 Martin N. Mwangi, P.O. Box 30538, Chichiri, BT3, Blantyre, Malawi. Email: [mmwangi@true.mw](mailto:mmwangi@true.mw)

31

32

33

34 Word count: 4,962 words. (Abstract) 299 words. (*excluding title page, abstract, references, figures*

35

36 *and tables*)

37

38

39

40

41

42

43

44

45

46

47

48

49

50

51

52

53

54

55

56

57

58

59

60

**ABSTRACT**

**Introduction:** Anaemia in pregnancy remains a critical global health problem, affecting 46% of pregnant women in Africa and 49% in Asia. Oral iron therapy requires extended adherence to achieve correction of anaemia and replenishment of iron stores. Ferric carboxymaltose (FCM) is a recently established intravenous iron formulation associated with substantial advantages in safety, speed of delivery and total dose deliverable in a single infusion. We aim to determine whether FCM given once during the second trimester of pregnancy compared to standard oral iron distributed through routine antenatal services is effective and safe for treatment of moderate to severe maternal anaemia in sub-Saharan Africa.

**Methods and analysis:** REVAMP is a two-arm confirmatory individually-randomised controlled trial set in Blantyre and Zomba districts in Malawi. The trial will randomise 862 women in the second trimester of pregnancy with a capillary haemoglobin concentration below 10.0g/dL. The study comprises two arms: (a) intravenous ferric carboxymaltose (20mg/kg up to 1000mg) given once at randomisation, and (b) standard of care oral iron (65mg elemental iron twice daily) for 90 days (or the duration of pregnancy, whichever is shorter) provided according to local health care practices. Both arms receive sulfadoxine-pyrimethamine (SP) as Intermittent Preventive Treatment in pregnancy (IPTp). The primary outcome is the prevalence of anaemia (Hb<11.0g/dL) at 36 weeks' gestation. Secondary outcomes include birth weight, gestation duration, and safety outcomes, including clinical malaria, serious perinatal events and postpartum haematologic and health-related outcomes in the mother and child.

**Ethics and dissemination:** Ethical approval was granted by the Research Ethics Committee (COMREC P.02/18/2357) in Malawi and the Human Research Ethics Committee (WEHI: 18/02), Melbourne, Australia. The protocol is registered with the Australian and New Zealand Clinical Trials Registry

1  
2  
3 ([ACTRN12618001268235](#)). The results will be shared with the local community that enabled the  
4  
5 research, and also to the international fora.

6  
7 **Keywords:** Anaemia, Iron Deficiency, Intravenous Iron, ferric carboxymaltose (FCM), Pregnancy,  
8  
9 Malawi, randomised controlled trial

#### 10 11 12 **Data Statement**

13  
14 All relevant data are within the paper and its supporting information files.

#### 15 16 17 18 19 **Protocol version**

20  
21 REVAMP Trial protocol version 5.0 dated 21 November 2020

#### 22 23 24 **Ethics approval**

25  
26 College of Medicine Research Ethics Committee (COMREC P.02/18/2357) in Malawi and the Walter  
27  
28 and Eliza Hall Institute of Medical Research Human Research Ethics Committee (WEHI: 18/02),  
29  
30 Melbourne, Australia.

#### 31 32 33 **Trial Sponsor**

34  
35 Director - Research Support Centre.

36  
37 College of Medicine, Kamuzu University of Health Sciences (KUHeS), Private Bag 360, Chichiri,  
38  
39 Blantyre 3, Malawi.

40  
41 Email: [rsdirector@medcol.mw](mailto:rsdirector@medcol.mw)

#### 42 43 44 45 46 **Roles and responsibilities of sponsor and funder:**

47  
48 The sponsor and funder had no role in study design. They will have no role nor ultimate authority in  
49  
50 the collection, management, analysis, and interpretation of data; writing of the report; and the  
51  
52 decision to submit the report for publication.  
53  
54  
55  
56  
57  
58  
59  
60

## ARTICLE SUMMARY

### Strengths and limitations of this study

1. Trial setting: The trial is conducted in a low-income sub-Saharan African setting where there is a high prevalence of anaemia in pregnancy, low birth weight and *P. falciparum* malaria. The trial will provide critical new data on the effectiveness and safety of intravenous iron in a context where a) anaemia and iron deficiency rates are high, b) malaria is prevalent and causes anaemia, and c) iron interventions may increase malaria infection rates. In these settings, needs for anaemia control are critical.
2. Participant screening: Eligibility for inclusion is determined by moderate or severe anaemia detected via capillary haemoglobin estimation, which at present is a convenient and available method for assessing anaemia status that could be deployed in the high-throughput health centre setting; our results will thus provide direct information on the impact of this highly feasible screening and treatment approach for antenatal anaemia.
3. Use of ferric carboxymaltose: this is the first trial in a low-income field setting to use a recently established intravenous iron formulation for the treatment of anaemia in pregnancy; previous trials in low-income settings have used older formulations such as iron sucrose and iron dextrans, which may have a higher risk of adverse events and take longer to infuse, and thus are suboptimal for routine deployment in the health centre setting.
4. Outcomes: our trial includes a critical primary outcome of anaemia before delivery, as well as key secondary outcomes to assess the benefit of the trial intervention for mother and neonate, and detailed safety assessments using active and passive data collection.
5. Sample size: this is the largest trial of ferric carboxymaltose in pregnancy. It is also among the largest trials of ferric carboxymaltose (and intravenous iron) ever conducted. The study will thus provide critical effectiveness and safety information on this drug's role in pregnancy globally.



## INTRODUCTION

Anaemia during pregnancy remains a critical global health problem. Almost 40% of pregnant women worldwide are anaemic, including 46% of pregnant women in Africa and 49% in Asia.<sup>1</sup> Anaemia in pregnancy is very common and mostly results from iron deficiency and is associated with critical risks for both mother (e.g. life-threatening complications of postpartum haemorrhage) and child (especially prematurity and low birth weight,<sup>2</sup> which are associated with increased risk of neonatal and infant mortality,<sup>3</sup> and reduced iron stores in infancy with increased risk of subsequent anaemia and impaired development).<sup>4</sup> Severe anaemia in pregnancy is associated with a significantly increased risk of maternal mortality.<sup>5</sup> Worldwide, 15%-20% of births (>20 million annually, including 13% in sub-Saharan Africa) are low birthweight. At the same time, each year, over 1 million children die from preterm birth complications, making prevention and treatment of antenatal anaemia a crucial component of efforts to reduce low birth weight.

Systematic reviews confirm likely benefits from iron on maternal outcomes, including anaemia (70% reduction) and trends towards favourable infant outcomes, including increased birth weight and extended gestation duration.<sup>6</sup> A trial of oral iron compared with placebo in Kenyan pregnant women confirmed a benefit from iron on birth weight and gestation duration.<sup>7</sup> Global recommendations for managing anaemia in pregnancy in lower and middle income countries (LMICs) currently advise that women be treated with high-dose daily oral iron (120 mg of elemental iron) supplementation for three months.<sup>8-9</sup> However, oral iron is often poorly tolerated due to gastrointestinal adverse effects,<sup>10</sup> limiting adherence; lower doses with intermitted dosing have been used in non-pregnant women.<sup>11</sup> Delivery of iron during pregnancy requires high-quality performance of the primary health system. In Malawi, 10.6% of women were reported to take no iron during pregnancy, and 37.1% take less than 60 doses, with only 33.4% taking the recommended 90 or more doses.<sup>12</sup> Even when delivered, oral iron frequently fails to correct anaemia. For example, 61% of Gambian pregnant women who received iron at week 20 of gestation – when their Hb was lower than 10.0g/dL – still had a Hb<10.0g/dL at 30

1  
2  
3 weeks' gestation.<sup>13</sup> Finally, women may only present for their first antenatal visit late in the second  
4  
5 trimester, curtailing the time available to optimise iron stores with oral iron to improve foetal  
6  
7 development and risks associated with delivery; for example, in Malawi, fewer than 30% of pregnant  
8  
9 women attend before the sixteenth week of gestation.<sup>14</sup>  
10  
11  
12  
13  
14

15 Over the past decade, there have been dramatic improvements in parenteral (intravenous) iron  
16  
17 therapeutics. Ferric carboxymaltose (FCM) is a widely used formulation that can be administered in a  
18  
19 short period (15 min) and at large doses (up to 1000 mg) in a single infusion.<sup>15 16</sup> FCM has  
20  
21 revolutionised the treatment of iron-deficiency anaemia in high-income country settings and is widely  
22  
23 used in outpatient settings, emergency departments, and primary care.<sup>17</sup> In pregnancy, intravenous  
24  
25 iron has been reported to be superior to oral iron in improving haemoglobin concentrations and may  
26  
27 even increase birth weight.<sup>18</sup> Intravenous iron is increasingly recommended as a suitable first-line  
28  
29 option for women with moderate or severe iron-deficiency anaemia beyond the first trimester of  
30  
31 pregnancy.<sup>19</sup> Studies have evaluated the role of older forms of intravenous iron in pregnancy in low-  
32  
33 income settings such as India,<sup>20 21</sup> whilst other studies have demonstrated the feasibility of using FCM  
34  
35 in the post-partum period in sub-Saharan Africa<sup>22</sup> but modern formulations capable of delivering a  
36  
37 rapid total-dose infusion have not yet been studied in women in pregnancy in low income countries.  
38  
39  
40  
41  
42  
43

44 It remains challenging to directly measure iron status in the field, as biomarkers generally require  
45  
46 analysis using centralised laboratory infrastructure. In contrast, point-of-care measurement of  
47  
48 capillary haemoglobin is a feasible field-friendly testing strategy that can be deployed with existing  
49  
50 technology, of which HemoCue point-of-care devices are a good example. Screen-and-treat  
51  
52 approaches for anaemia in pregnancy must rely on haemoglobin measurement until point-of-care  
53  
54 assays for iron status become more widely available.  
55  
56  
57  
58  
59

60 FCM presents a practical opportunity for rapid correction of moderate and severe antenatal anaemia

1  
2  
3 in a single dose, potentially improving maternal and neonatal clinical outcomes for pregnant women.  
4  
5 It is, therefore, urgent to test this therapy in a low-income field setting where the burden of anaemia-  
6  
7 related disease is heaviest. In Malawian pregnant women with moderate or severe anaemia during  
8  
9 the second trimester of pregnancy, we aim to evaluate whether a single dose of intravenous ferric  
10  
11 carboxymaltose is superior to oral iron provided via standard-of-care approaches.  
12  
13  
14  
15  
16  
17

## 18 **METHODS AND ANALYSIS**

### 19 **Patient and Public Involvement**

20  
21  
22  
23  
24 We held discussions with national policy stakeholders during the study planning stage, including the  
25  
26 Ministry of Health. We discussed how the research might align with national research and health  
27  
28 service priorities. Local community engagement was done via public meetings; the potential  
29  
30 participants were first involved in the study's design during these meetings. We discussed the study  
31  
32 with the traditional leaders, including traditional authorities (TAs), group village headmen (GVH),  
33  
34 the village development committee (VDC), and ward councillors (political figures). The GVH were  
35  
36 requested to cascade the information to the village chiefs who took the information to the  
37  
38 community. Health workers were accessed via the District Health Offices in Blantyre and Zomba  
39  
40 districts. Health workers from the participating health facilities, including the health surveillance  
41  
42 assistants (HSAs) who directly work with the community, were informed about the proposed  
43  
44 research and discussions on priorities beneficial to the community were discussed. The public,  
45  
46 potential participants, and health workers identified malaria and anaemia as major public health  
47  
48 issues in the community. Women outlined their experiences with iron supplements during their past  
49  
50 pregnancies and identified the development of tolerable iron formulations as a research priority.  
51  
52  
53  
54  
55  
56  
57  
58  
59  
60  
61  
62  
63  
64  
65  
66  
67  
68  
69  
70  
71  
72  
73  
74  
75  
76  
77  
78  
79  
80  
81  
82  
83  
84  
85  
86  
87  
88  
89  
90  
91  
92  
93  
94  
95  
96  
97  
98  
99  
100  
101  
102  
103  
104  
105  
106  
107  
108  
109  
110  
111  
112  
113  
114  
115  
116  
117  
118  
119  
120  
121  
122  
123  
124  
125  
126  
127  
128  
129  
130  
131  
132  
133  
134  
135  
136  
137  
138  
139  
140  
141  
142  
143  
144  
145  
146  
147  
148  
149  
150  
151  
152  
153  
154  
155  
156  
157  
158  
159  
160  
161  
162  
163  
164  
165  
166  
167  
168  
169  
170  
171  
172  
173  
174  
175  
176  
177  
178  
179  
180  
181  
182  
183  
184  
185  
186  
187  
188  
189  
190  
191  
192  
193  
194  
195  
196  
197  
198  
199  
200  
201  
202  
203  
204  
205  
206  
207  
208  
209  
210  
211  
212  
213  
214  
215  
216  
217  
218  
219  
220  
221  
222  
223  
224  
225  
226  
227  
228  
229  
230  
231  
232  
233  
234  
235  
236  
237  
238  
239  
240  
241  
242  
243  
244  
245  
246  
247  
248  
249  
250  
251  
252  
253  
254  
255  
256  
257  
258  
259  
260  
261  
262  
263  
264  
265  
266  
267  
268  
269  
270  
271  
272  
273  
274  
275  
276  
277  
278  
279  
280  
281  
282  
283  
284  
285  
286  
287  
288  
289  
290  
291  
292  
293  
294  
295  
296  
297  
298  
299  
300  
301  
302  
303  
304  
305  
306  
307  
308  
309  
310  
311  
312  
313  
314  
315  
316  
317  
318  
319  
320  
321  
322  
323  
324  
325  
326  
327  
328  
329  
330  
331  
332  
333  
334  
335  
336  
337  
338  
339  
340  
341  
342  
343  
344  
345  
346  
347  
348  
349  
350  
351  
352  
353  
354  
355  
356  
357  
358  
359  
360  
361  
362  
363  
364  
365  
366  
367  
368  
369  
370  
371  
372  
373  
374  
375  
376  
377  
378  
379  
380  
381  
382  
383  
384  
385  
386  
387  
388  
389  
390  
391  
392  
393  
394  
395  
396  
397  
398  
399  
400  
401  
402  
403  
404  
405  
406  
407  
408  
409  
410  
411  
412  
413  
414  
415  
416  
417  
418  
419  
420  
421  
422  
423  
424  
425  
426  
427  
428  
429  
430  
431  
432  
433  
434  
435  
436  
437  
438  
439  
440  
441  
442  
443  
444  
445  
446  
447  
448  
449  
450  
451  
452  
453  
454  
455  
456  
457  
458  
459  
460  
461  
462  
463  
464  
465  
466  
467  
468  
469  
470  
471  
472  
473  
474  
475  
476  
477  
478  
479  
480  
481  
482  
483  
484  
485  
486  
487  
488  
489  
490  
491  
492  
493  
494  
495  
496  
497  
498  
499  
500  
501  
502  
503  
504  
505  
506  
507  
508  
509  
510  
511  
512  
513  
514  
515  
516  
517  
518  
519  
520  
521  
522  
523  
524  
525  
526  
527  
528  
529  
530  
531  
532  
533  
534  
535  
536  
537  
538  
539  
540  
541  
542  
543  
544  
545  
546  
547  
548  
549  
550  
551  
552  
553  
554  
555  
556  
557  
558  
559  
560  
561  
562  
563  
564  
565  
566  
567  
568  
569  
570  
571  
572  
573  
574  
575  
576  
577  
578  
579  
580  
581  
582  
583  
584  
585  
586  
587  
588  
589  
590  
591  
592  
593  
594  
595  
596  
597  
598  
599  
600  
601  
602  
603  
604  
605  
606  
607  
608  
609  
610  
611  
612  
613  
614  
615  
616  
617  
618  
619  
620  
621  
622  
623  
624  
625  
626  
627  
628  
629  
630  
631  
632  
633  
634  
635  
636  
637  
638  
639  
640  
641  
642  
643  
644  
645  
646  
647  
648  
649  
650  
651  
652  
653  
654  
655  
656  
657  
658  
659  
660  
661  
662  
663  
664  
665  
666  
667  
668  
669  
670  
671  
672  
673  
674  
675  
676  
677  
678  
679  
680  
681  
682  
683  
684  
685  
686  
687  
688  
689  
690  
691  
692  
693  
694  
695  
696  
697  
698  
699  
700  
701  
702  
703  
704  
705  
706  
707  
708  
709  
710  
711  
712  
713  
714  
715  
716  
717  
718  
719  
720  
721  
722  
723  
724  
725  
726  
727  
728  
729  
730  
731  
732  
733  
734  
735  
736  
737  
738  
739  
740  
741  
742  
743  
744  
745  
746  
747  
748  
749  
750  
751  
752  
753  
754  
755  
756  
757  
758  
759  
760  
761  
762  
763  
764  
765  
766  
767  
768  
769  
770  
771  
772  
773  
774  
775  
776  
777  
778  
779  
780  
781  
782  
783  
784  
785  
786  
787  
788  
789  
790  
791  
792  
793  
794  
795  
796  
797  
798  
799  
800  
801  
802  
803  
804  
805  
806  
807  
808  
809  
810  
811  
812  
813  
814  
815  
816  
817  
818  
819  
820  
821  
822  
823  
824  
825  
826  
827  
828  
829  
830  
831  
832  
833  
834  
835  
836  
837  
838  
839  
840  
841  
842  
843  
844  
845  
846  
847  
848  
849  
850  
851  
852  
853  
854  
855  
856  
857  
858  
859  
860  
861  
862  
863  
864  
865  
866  
867  
868  
869  
870  
871  
872  
873  
874  
875  
876  
877  
878  
879  
880  
881  
882  
883  
884  
885  
886  
887  
888  
889  
890  
891  
892  
893  
894  
895  
896  
897  
898  
899  
900  
901  
902  
903  
904  
905  
906  
907  
908  
909  
910  
911  
912  
913  
914  
915  
916  
917  
918  
919  
920  
921  
922  
923  
924  
925  
926  
927  
928  
929  
930  
931  
932  
933  
934  
935  
936  
937  
938  
939  
940  
941  
942  
943  
944  
945  
946  
947  
948  
949  
950  
951  
952  
953  
954  
955  
956  
957  
958  
959  
960  
961  
962  
963  
964  
965  
966  
967  
968  
969  
970  
971  
972  
973  
974  
975  
976  
977  
978  
979  
980  
981  
982  
983  
984  
985  
986  
987  
988  
989  
990  
991  
992  
993  
994  
995  
996  
997  
998  
999  
1000

## Trial objectives

The primary objective of the trial is to determine whether, in Malawian women in the second trimester of pregnancy with moderate or severe anaemia, a single dose of FCM up to 1000mg is superior to standard-of-care (i.e. oral iron provided through local health services), in reducing maternal anaemia before delivery (at 36 weeks' gestation).

The secondary objectives are:

During pregnancy and up to one month postpartum, to determine the effects of FCM (compared with standard-of-care) on:

Effectiveness:

- Maternal haemoglobin concentration and iron status (measured through iron biomarkers), and
- Critical neonatal outcomes including birth weight (low birth weight), gestation duration (prematurity), small for gestational age and other perinatal outcomes.

Safety:

- Maternal and neonatal adverse events, including infection episodes, serious maternal complications, and hypophosphatemia.

Exploratory objectives up to one month postpartum for subsequent hypothesis generation are related to maternal cognition, depression, and fatigue, as well as costs of health care.

## Study design

REVAMP is a multicentre, open-label, two-arm, parallel-group individually randomised controlled trial (RCT). An open-label (rather than blinded) design was selected as it was considered unfeasible to deliver the placebo intravenous infusions to Malawian pregnant women in this field-trial context (the

1  
2  
3 drug is dark-coloured). The trial recruited pregnant women in their second trimester and is following  
4 them until one month postpartum, after which we will report on the primary and secondary  
5 objectives. Extended follow-up of mothers and infants to 12-months postpartum is planned, as is a  
6 range of exploratory economic, biological and clinical outcomes. These analyses are beyond the scope  
7 of this protocol, as are the exploratory outcomes collected up to one month postpartum, and they will  
8 be reported separately. The trial design is summarised in **Figure 1**.  
9  
10  
11  
12  
13  
14  
15  
16  
17  
18

### 19 **Study settings and participants**

20  
21 In Malawi, the average gestation age at the first antenatal clinic (ANC) visit is 22 weeks, with 61%  
22 presenting before 24 weeks. The 2015-16 DHS survey estimated a prevalence of anaemia (Hb <  
23 11.0g/dL) in pregnant women in Malawi at 45.1%, including 22.4% of women with moderate or severe  
24 anaemia.<sup>12</sup> The prevalence of low birth weight in Malawi was around 14% in 2015.<sup>23</sup> Malawi is endemic  
25 for malaria and the prevalence of *Plasmodium spp.* parasitaemia at the first ANC visit in the study site  
26 exceeds 15%.<sup>24</sup> About 87% of women consume at least one dose of intermittent preventive treatment  
27 during pregnancy (IPTp), but this falls to 30% for women taking three or more doses.<sup>12</sup>  
28  
29  
30  
31  
32  
33  
34  
35  
36  
37  
38  
39

40 The REVAMP study has two major research sites namely Limbe Health Centre and Zomba Central  
41 Hospital located in Blantyre and Zomba districts respectively, in Southern Malawi. The two major sites  
42 act as the study coordination centres in the respective districts. The Blantyre site serves as the base  
43 for five urban health centres/antenatal clinics, whilst the Zomba site serves as the base for nine (four  
44 urban and five rural) health centres/antenatal clinics. Women are screened at the antenatal clinics  
45 and referred to the coordinating research site for enrolment, treatment and follow-up visits. Deliveries  
46 occur in government-operated birth suites attached to the study site with referral to a district hospital  
47 where required for obstetric indications.  
48  
49  
50  
51  
52  
53  
54  
55  
56  
57  
58  
59  
60

### Eligibility criteria

Women are only randomised if they fulfil all inclusion criteria and none of the exclusion criteria.

#### *Inclusion criteria:*

1. Confirmed singleton pregnancy at 13-26 weeks' gestation
2. Moderate to severe anaemia (capillary haemoglobin <10.0g/dL measured by HemoCue 301+) not clinically deemed to require an immediate blood transfusion. We excluded women with mild anaemia as thresholds to distinguish mild anaemia from health are indistinct, and because moderate and severe anaemia have an increased link to adverse maternal and child health outcomes.<sup>25</sup>
3. Negative malaria parasitaemia at screening and no positive malaria rapid diagnostic test within the previous seven days
4. Resident in the study catchment area of Blantyre and Zomba district
5. Plan to deliver at a health facility
6. Written informed consent, including assent if <18 years old (consent of a parent or guardian plus the participant's assent).

#### *Exclusion criteria:*

1. Hypersensitivity to any of the study drugs
2. Clinical symptoms of malaria or positive malaria rapid diagnostic test within the previous seven days, or symptoms of bacterial infection, at screening
3. Any condition requiring hospitalisation or serious concomitant illness
4. Chronic illness that may adversely affect foetal growth and viability
5. Severe anaemia clinically judged as requiring a blood transfusion (usually Hb <5.0g/dL)
6. Pre-eclampsia at screening (new onset of hypertension, proteinuria and swelling in the legs, feet, and hands).

## Trial Interventions

Participants are randomly assigned to receive one of the following interventions:

1. **Intravenous iron:** ferric carboxymaltose 20mg/kg up to 1000mg, diluted in normal saline and given over 15 minutes, once after randomisation. The study clinician administers the drug, and women remain under observation for 45 minutes after drug administration. Women receiving FCM are treated in rooms equipped with a trolley containing adrenaline, hydrocortisone, intravenous fluids and antihistamines, airway equipment and an oxygen concentrator. Staff are trained in the management of allergic reactions. Ferric carboxymaltose, manufactured by Vifor Pharma, was purchased at full-price from Aspen Pharma in Australia and shipped to Malawi.
2. **Standard-of-care - Oral iron treatment course:** oral iron- 200mg ferrous sulphate (approx. 65mg elemental iron) twice daily for 90 days or the remaining duration of pregnancy, whichever is shorter. Oral iron is provided by health workers using the same education messaging and similar packaging as provided by the routine health system to reflect real-life health service conditions.

Following national guidelines, both groups receive IPTp with 1500 mg Sulfadoxine and 75 mg Pyrimethamine (SP), as three tablets of SP of fixed dose (500mg/25mg) at least three times during pregnancy, at least four weeks apart. The IPTp-SP course at four weeks' post-randomisation is directly observed by study staff. HIV positive women in Malawi are not offered SP because they are already on Cotrimoxazole prophylaxis. The baseline dose is also directly administered by study staff if the participant did not receive it through the health service. All participants also receive an insecticide-treated bed net.

## Randomisation, allocation concealment, and blinding

Participants are randomly allocated to one of the two treatments arms with 1:1 allocation via a computer-generated randomisation schedule of randomly permuted blocks stratified by research site

1  
2  
3 (Blantyre, Zomba) to achieve a balance between the arms within each site. The randomisation list was  
4  
5 generated by an independent statistician at the University of Melbourne (Australia).  
6  
7  
8  
9

10 Individual participant codes were pre-packed in sealed envelopes by an independent researcher not  
11 associated with the study and held securely at the research sites. Eligible participants who meet all  
12 inclusion/exclusion criteria are sequentially allocated participant identification numbers within the  
13 research site, and their allocation to study group is revealed after opening the corresponding sealed  
14 envelope. Although the trial is open-label, laboratory scientists measuring haemoglobin  
15 concentration, midwives collecting birth outcome data, and investigators and researchers in Australia  
16 (including data managers and statisticians in Melbourne) are blinded to the treatment allocation  
17 during the conduct of the trial until the database is locked and ready for unblinding.  
18  
19  
20  
21  
22  
23  
24  
25  
26  
27  
28  
29  
30  
31

### 32 **Recruitment and Visits**

33  
34 **Table 1** shows the schedule of activities per visit for the mother, and **Table 2** shows the schedule of  
35 activities per visit for the neonate.  
36  
37  
38  
39  
40  
41  
42  
43  
44  
45  
46  
47  
48  
49  
50  
51  
52  
53  
54  
55  
56  
57  
58  
59  
60



**Table 1: Planned activities per visit for mothers**

|                          | Visit 0     | Visit 1 | Visit 2           | Visit 3 <sup>i</sup>            | Visit 4                         | Visit 5 –<br>6 <sup>j</sup>            | Visit 7             | Visit 8                         |
|--------------------------|-------------|---------|-------------------|---------------------------------|---------------------------------|----------------------------------------|---------------------|---------------------------------|
| <b>Protocol activity</b> | Day -7 to 0 | Day 0   | Day 28 ±2<br>days | 34 wks.<br>gestation<br>±2 days | 36 wks.<br>gestation<br>±2 days | 38-40<br>wks.<br>gestation<br>± 2 days | Delivery<br>+ 1 day | Day 28<br>postpartum<br>±2 days |

For peer review only

| <i>Location of visit</i>                       | <i>Antenatal<br/>Clinic</i> | <i>Research<br/>Site<sup>a</sup></i> | <i>Research<br/>Site<sup>a</sup></i> | <i>Home<sup>b</sup></i> | <i>Research<br/>Site<sup>a</sup></i> | <i>Home<sup>b</sup></i> | <i>Research<br/>Site<sup>a</sup></i> | <i>Research Site<sup>a</sup></i> |
|------------------------------------------------|-----------------------------|--------------------------------------|--------------------------------------|-------------------------|--------------------------------------|-------------------------|--------------------------------------|----------------------------------|
| Informed consent process for pre-screening     | X                           |                                      |                                      |                         |                                      |                         |                                      |                                  |
| Pre-screening                                  | X                           |                                      |                                      |                         |                                      |                         |                                      |                                  |
| Detailed Informed consent process              | X                           | X                                    |                                      |                         |                                      |                         |                                      |                                  |
| Screening                                      |                             | X                                    |                                      |                         |                                      |                         |                                      |                                  |
| Medical & obstetric history                    |                             | X                                    |                                      |                         |                                      |                         |                                      |                                  |
| Demographics                                   |                             | X                                    |                                      |                         |                                      |                         |                                      |                                  |
| Maternal physical examination <sup>d</sup>     |                             | X <sup>h</sup>                       | X <sup>i</sup>                       |                         | X <sup>i</sup>                       |                         | X <sup>h</sup>                       | X <sup>i</sup>                   |
| Ultrasound scan (Fetal Biometry) <sup>d</sup>  |                             | X                                    | X                                    |                         | X                                    |                         |                                      |                                  |
| Randomise participant                          |                             | X                                    |                                      |                         |                                      |                         |                                      |                                  |
| Administer treatment                           |                             | X                                    |                                      |                         |                                      |                         |                                      |                                  |
| Intermittent preventive treatment <sup>c</sup> |                             | X                                    | X                                    |                         | X                                    |                         |                                      |                                  |
| <b>Laboratory procedures</b>                   |                             |                                      |                                      |                         |                                      |                         |                                      |                                  |
| Capillary haemoglobin <sup>d</sup>             | X                           | X                                    | X                                    | X                       | X                                    | X                       | X                                    | X                                |
| Full blood count <sup>d</sup>                  |                             | X                                    | X                                    |                         | X                                    |                         | X                                    | X                                |
| Malaria diagnostics <sup>d,e</sup>             | X                           | X                                    | X                                    |                         | X                                    |                         | X                                    | X                                |
| Serum for iron markers tests <sup>f</sup>      |                             | X                                    | X                                    |                         | X                                    |                         | X                                    | X                                |

|                                                   |  |   |   |   |   |   |   |   |
|---------------------------------------------------|--|---|---|---|---|---|---|---|
| Serum for inflammatory markers tests <sup>g</sup> |  | X | X |   | X |   | X | X |
| Phosphate                                         |  | X | X |   | X |   | X | X |
| Adverse events <sup>d</sup>                       |  | X | X |   | X |   | X | X |
| Morbidities                                       |  |   |   |   |   |   |   | X |
| Missed visits <sup>d</sup>                        |  |   | X | X | X | X | X | X |
| End of study                                      |  |   | X | X | X | X | X | X |

<sup>a</sup> Visit conducted at the research site/health facility; <sup>b</sup> Visit conducted at the participant's home; <sup>c</sup> Assessing if intermittent preventive treatments sulphadoxine pyrimethamine and albendazole were given; <sup>d</sup> Protocol activities are also collected at any unscheduled visits; <sup>e</sup> Malaria diagnostics include malaria rapid diagnostic test, malaria microscopy; <sup>f</sup> Serum for iron markers tests include serum ferritin; <sup>g</sup> Serum for inflammatory markers tests include C-reactive protein and alpha-1 glycoprotein; <sup>h</sup> Complete maternal physical examination includes general appearance, throat, neck, thyroid, musculoskeletal, skin, lymph nodes, extremities, pulses, pulmonary, cardiac, abdominal, and neurological examination; <sup>i</sup> Limited maternal physical examination includes general appearance, brief pulmonary, cardiac, abdominal and neurological examination. <sup>j</sup> Since the opening of the trial, visits 3, 5 and 6 have been suspended since April 2020 due to the risk of exposing communities to COVID-19 during home visits.

**Table 2: Details of planned activities per visit for neonates**

| Protocol activity                                      | Visit 7                          | Visit 8                          |
|--------------------------------------------------------|----------------------------------|----------------------------------|
|                                                        | Delivery +1 day                  | Day 28 Postpartum ±2 days        |
| <i>Location of visit</i>                               | <i>Research Site<sup>a</sup></i> | <i>Research Site<sup>a</sup></i> |
| Pregnancy outcome                                      | X                                |                                  |
| Physical examination and anthropometry <sup>b, c</sup> | X <sup>f</sup>                   | X <sup>g</sup>                   |
| <b>Laboratory procedures</b>                           |                                  |                                  |
| Capillary haemoglobin                                  | X <sup>h</sup>                   |                                  |
| Full blood count <sup>b</sup>                          | X <sup>h</sup>                   | X                                |
| Malaria diagnostics <sup>d</sup>                       | X <sup>h</sup>                   | X                                |
| Serum for iron markers tests <sup>e</sup>              | X <sup>h</sup>                   | X                                |
| Vaccination and Vit A supplementation status           |                                  | X                                |
| Adverse events <sup>b</sup>                            | X                                | X                                |
| Morbidities                                            |                                  | X                                |
| Missed visits <sup>b</sup>                             |                                  | X                                |
| End of study                                           | X                                | X                                |

<sup>a</sup> Visit done at the research site/ health facility; <sup>b</sup> Protocol activities are also collected at any unscheduled visits; <sup>c</sup> Anthropometry includes assess the infant's weight, length, and head circumference; <sup>d</sup> Malaria diagnostics include malaria rapid diagnostic test, malaria microscopy, malaria filter paper for polymerase chain reaction and histology at delivery; <sup>e</sup> Serum for iron markers tests include serum ferritin; <sup>f</sup> The complete physical examination includes general appearance, throat, neck, thyroid, musculoskeletal, skin, lymph nodes, extremities, pulses, pulmonary, cardiac, abdominal, and neurological examination <sup>g</sup> The limited examination includes general appearance, brief pulmonary, cardiac, abdominal and neurological examination; <sup>h</sup> These assessments are collected via cord blood.

## Screening and enrolment of participants

Study recruitment opened on November 12, 2018; the final participant was recruited on March 02, 2021. Study activities are detailed in Tables 1 and 2.

### *Pre-screening and screening, visit 0 (day -7 to 0)*

Women attending their first antenatal visit at ANCs are given general information (aims and procedures) about the study by a trained research nurse and invited to consent to pre-screening procedures. As the ANC nurse cares for attendees, the research nurse pre-screens potential participants by noting apparent gestation age based on clinical examination and last menstrual period and then tests for anaemia with capillary Hb (HemoCue 301+, Angelholm Sweden) and *Plasmodium* parasitaemia by rapid diagnostic test (SD Bioline Malaria AG P.F/PAN, Standard Diagnostics, Inc.). Potentially eligible participants receive further information about the study. Willing participants are referred to the research site for additional evaluation, full consenting procedure and recruitment.

### *Enrolment, visit 1 (day 0)*

As presented in Table 1, at the health facility, potentially eligible participants undergo ultrasound scanning (within two days from the initial pre-screening visit) to confirm singleton pregnancy and determine gestation age (i.e. crown-rump length for less than or equal to 16 weeks, femur length and head and abdominal circumference for more than 16 weeks). Written informed consent is then obtained for participation in the trial. For consenting participants, a physical examination is conducted, and baseline data are collected, comprising demographic information and medical and obstetric history. Following the collection of baseline clinical data, samples of both capillary and venous blood are collected and then participants are randomised. For women randomised to the ferric carboxymaltose arm of the trial, an intravenous cannula is inserted under aseptic precautions, and a trained nurse administers the study drug according to standard procedures and under the supervision of the study clinician. Women randomised to the standard-of-care arm of the trial are provided with

1  
2  
3 a full course of iron tablets, together with information delivered according to a standardised script  
4  
5 reflecting ANC practice.  
6  
7

### 8 **Subsequent study visits**

9  
10  
11 *Visit 2 (28 ( $\pm$ 2) days after enrolment into the study):* Participants receive a physical examination and  
12  
13 an ultrasound scan before being asked for a venous blood sample (Table 1). A capillary sample is  
14  
15 collected for assessment of *Plasmodium* parasitaemia. The participants are asked to continue their  
16  
17 regular ongoing ANC visits through their local health centre.  
18  
19

20  
21 *Visit 3; visits 5-6 (34 weeks' gestation  $\pm$ 2 days; 38-40 weeks' gestation  $\pm$ 2 days):* Participants are visited  
22  
23 in their home at 34 weeks' gestation, and every two weeks from 38 weeks' gestation until delivery. A  
24  
25 research nurse measures capillary Hb. Where the participant belongs to the standard-of-care trial-  
26  
27 arm, the research nurse attempts to assess adherence. Notably, since the opening of the trial,  
28  
29 fieldwork has been affected by the COVID-19 pandemic. Because of the risks of study workers  
30  
31 introducing COVID-19 into remote villages, home visits were removed from the trial protocol after  
32  
33 April 2020.  
34  
35

36  
37  
38 *Visit 4 (36 weeks' gestation/pre-delivery  $\pm$ 2 days):* Procedures are similar to those for Visit 2 (28-days  
39  
40 post-treatment). This visit includes the assessment of venous haemoglobin for the primary outcome.  
41  
42

43 *Visit 7 (Delivery +1 day):* The study provides 24-hour cover of the study research sites' delivery suites.  
44  
45 All participants are asked to return to the research site for delivery (unless a high-risk pregnancy  
46  
47 requires delivery at the tertiary referral hospital). Standardised delayed cord clamping procedures are  
48  
49 instituted. Participants delivering at home or at other health facilities are encouraged to attend the  
50  
51 research site for assessment within 24 hours. Venous blood samples are collected during labour. Apgar  
52  
53 scores are recorded immediately after delivery, and the newborn undergoes a full physical  
54  
55 examination, including measurement of birth weight, length, head circumference, and assessment for  
56  
57 congenital malformations. The type of birth and occurrence of perinatal complications (including  
58  
59  
60

1  
2  
3 haemorrhage or need for blood transfusion) are recorded. Placental blood is drawn, and a sample of  
4 placental tissue is collected and stored in buffered formalin for subsequent histological evaluation.  
5  
6  
7

8 *Visit 8 (28 days postpartum  $\pm$ 2 days):* Participants return to the research site together with their  
9 infants for a detailed medical examination of both mother and infant and collection of blood samples.  
10  
11  
12

13 *Unscheduled visit:* Participants are asked to attend the research site when symptomatically unwell.  
14 They are managed according to national standard treatment guidelines by a trained health care  
15 provider. Blood samples for malaria RDT (and microscopy if RDT positive) and blood culture are taken  
16 if clinically indicated. The clinical diagnosis of the unscheduled visit is recorded in the participant's  
17 record. Where a participant attends another health facility or antenatal clinic, the research team  
18 extracts the missed unscheduled visit notes from the participants health book commonly known as a  
19 health "passport" in Malawi. Usually, clinical investigations and medications are indicated in the  
20 health book and can be extracted by the research team during the next scheduled visit.  
21  
22  
23  
24  
25  
26  
27  
28  
29  
30  
31

### 32 **Laboratory Procedures**

33 Venous blood is measured for haemoglobin concentration using an automated analyser (Sysmex, XP  
34 300 series, Sysmex Corporation, Kobe, Japan), for which daily two level controls are run and  
35 recorded. Serum is separated by centrifugation and stored at -80 degrees Celsius. Samples will be  
36 batched and assayed for ferritin, C-reactive protein, and phosphate in Meander Medical Centre  
37 laboratory, accreditation number M040, EN ISO 15189:2012 (Amersfoort, The Netherlands).  
38  
39  
40  
41  
42  
43  
44  
45  
46  
47

### 48 **Data Monitoring Committee (DMC)**

49 An independent DMC has been set up to review on a regular basis, safety and efficacy data of the  
50 ongoing trial. The DMC is comprised of international experts in clinical trials, obstetrics,  
51 epidemiology and statistics. In the advent of clear evidence of effectiveness or harm, the DMC will  
52 recommend to the sponsor and investigators whether to continue, modify, or terminate the trial on  
53 ethical grounds.  
54  
55  
56  
57  
58  
59  
60

## Outcomes

The primary outcome is the prevalence of maternal anaemia before delivery, defined as a venous haemoglobin concentration less than 11.0g/dL at 36 weeks' gestation. This outcome evaluates the performance of the study intervention in helping women reach labour with optimal tissue oxygenation and resilience.

Secondary outcomes assessing effectiveness in the mother are anaemia at four weeks' post-randomisation and one month postpartum, moderate/severe anaemia, haemoglobin concentration, iron deficiency (ferritin < 15mg/L adjusted for C-reactive protein), iron deficiency anaemia, and serum ferritin concentration all at four weeks post-randomisation, 36 weeks' gestation, and one month postpartum.

Effectiveness in the neonate is assessed using the outcome of mean birthweight (measured in grams within 24 hours of birth) and the secondary outcomes low birth weight (birth weight less than 2500g), gestation duration (weeks), birth length, small for gestation age, fetal loss (pregnancy loss before 28 completed weeks' gestation), stillbirth (birth of a child showing no signs of life after 28 weeks' gestation), preterm births (neonate born before 37 completed weeks of gestation), haemoglobin concentration at 1-month postpartum and infant growth (weight for age, length for age, weight for length) at one month postpartum.

Outcomes assessing safety in the mother are (serious) adverse events related to administration of FCM (events occurring during the enrolment visit), (serious) adverse events (within 14 days of randomisation, antenatal and postpartum reported separately), all-cause sick visits to the clinic (antenatal and postpartum reported separately), clinical malaria-specific visits to the clinic (antenatal and postpartum reported separately) *P. falciparum* parasitaemia (at four weeks' post-randomisation and 36 weeks' gestation), hypophosphatemia (biochemical) (at four weeks' post-randomisation and 36 weeks' gestation), inflammation (elevated C-reactive protein) (at four weeks' post-randomisation



1  
2  
3 and 36 weeks' gestation), and severe medical events including haemorrhage, receipt of blood  
4  
5 transfusion, ICU admission, or mortality.  
6  
7

8 Clinical infections will be reported during unplanned visits. Clinical malaria will be defined clinically,  
9  
10 in women who present with fever and a positive malaria test. Diarrhoea will be defined in women  
11  
12 with more than three loose stools per day. Other clinical diagnoses will be made according to local  
13  
14 health manuals.  
15  
16

17  
18 Safety in the infant is assessed using (serious) adverse events, all-cause visits to the clinic, infection-  
19  
20 related visits to the clinic, diarrhoea-related visits to the clinic, and clinical malaria-specific visits to  
21  
22 the clinic.  
23  
24

25  
26 In addition to the primary and secondary clinical outcomes listed above, which will support the  
27  
28 reporting of the confirmatory RCT, data for many exploratory outcomes are being collected between  
29  
30 enrolment and 12-months postpartum. These include assessing maternal cognition, mother-infant  
31  
32 bonding, maternal depression and fatigue, infant neurodevelopment, infant diet and health economic  
33  
34 data, including direct and indirect costs of health care. Also, women have given their consent for the  
35  
36 collection of samples for future translational studies, including evaluation of the vaginal and faecal  
37  
38 microbiome, maternal immune profiles, and effects of interventions directed towards *P. falciparum*  
39  
40 biology.  
41  
42  
43  
44  
45  
46  
47

#### 48 **Detection and reporting of Adverse Events and Serious Adverse Events**

49 Non-serious Adverse Events (AEs) and serious adverse events (SAEs) are collected from the time  
50  
51 consent is given until the participant completes the study (the final visit or withdrawal). These are  
52  
53 detected either through spontaneous reports by the participant, unplanned visits to the research site  
54  
55 or any of the participating health centres, observation by the study staff, and through standard  
56  
57  
58  
59  
60

1  
2  
3 questioning at each visit. All SAEs are reported to the sponsor and the appropriate ethics committee,  
4  
5 whether or not considered causally related to the study drugs.  
6  
7  
8  
9

## 10 11 **Sample size**

12  
13  
14 The sample size calculation is based on the primary maternal outcome of the proportion of women  
15 with pre-delivery anaemia (defined as venous Hb<11.0g/dL at 36 weeks' gestation). A systematic  
16 review and meta-analysis identified a 50% reduction in anaemia prevalence in women receiving oral  
17 iron.<sup>2</sup> In a cohort of pregnant women in the Gambia, we observed that 60% of pregnant women with  
18 Hb<10.0g/dL at 20 weeks' gestation who then receive iron interventions continue to have  
19 Hb<10.0g/dL by 30 weeks.<sup>13</sup> The pivotal Fer-ASAP trial (which compared FCM to oral iron in women  
20 with iron deficiency anaemia in high-income settings) demonstrated a 14% reduction in absolute  
21 anaemia prevalence compared with oral iron.<sup>26</sup> We hypothesise that routine iron supplementation  
22 will reduce anaemia prevalence from 100% to 60% (as seen in the Gambia,<sup>13</sup> and similar to data from  
23 Haider and colleagues<sup>2</sup>). We hypothesise that ferric carboxymaltose will result in a 10% absolute  
24 improvement in anaemia cure (to a prevalence of 50%). A total sample size of 862 pregnant women  
25 or 431 per group will provide 80% power to detect this difference, allowing for a 10% loss to follow-  
26 up and assuming a two-sided alpha of 5%. The sample size also has at least 80% power to detect an  
27 absolute difference between standard-of-care oral iron and ferric carboxymaltose of 100g in the  
28 neonatal outcome of birth weight (assuming a standard deviation of 450g and a two-sided alpha of  
29 5%), similar to the effect size seen in a trial of Kenyan women receiving oral iron when compared to  
30 placebo.<sup>7</sup>  
31  
32  
33  
34  
35  
36  
37  
38  
39  
40  
41  
42  
43  
44  
45  
46  
47  
48  
49  
50  
51

## 52 53 54 **STATISTICAL ANALYSIS PLAN**

55  
56  
57 A detailed statistical analysis plan will be finalised before unblinding of the database. Analyses will be  
58 performed where participants are classified according to their randomised intervention arm (i.e.  
59  
60

1  
2  
3 intention to treat principle). An available case analysis will be performed for repeated time point  
4  
5 outcomes (e.g. anaemia) and a complete-case analysis for single time point outcomes (e.g. birth  
6  
7 weight). Anaemia will be analysed using a log-binomial regression model, including study participants  
8  
9 as a random intercept to account for the multiple time points. The model will include the standard-  
10  
11 of-care (oral iron) group as the reference group. The primary maternal hypothesis will be evaluated  
12  
13 by obtaining the estimate of the prevalence ratio of IV iron versus standard-of-care (oral iron), 95%  
14  
15 confidence interval extracted at 36 weeks' gestation, and p-value. Birthweight will be analysed by  
16  
17 fitting a linear regression model. The primary neonatal hypothesis will be evaluated by estimating the  
18  
19 absolute difference in mean birth weight between IV iron and standard-of-care (oral iron) along with  
20  
21 a corresponding 95% confidence interval and p-value. Secondary repeated time point binary  
22  
23 outcomes will be analysed similarly to anaemia, and secondary single time point continuous outcomes  
24  
25 will be analysed similarly to birthweight. Secondary, single time point binary outcomes (e.g., sub-  
26  
27 optimal pregnancy outcomes) will be analysed using a log-binomial regression model and secondary,  
28  
29 multiple time point continuous outcomes (e.g., maternal haemoglobin concentration) will be analysed  
30  
31 using a likelihood-based longitudinal data analysis model.<sup>27</sup> Appropriate transformations may be  
32  
33 applied to the variables before fitting the model if considered skewed (e.g. ferritin). Additional  
34  
35 analyses using multiple imputation will be performed to handle missing data. Results will be compared  
36  
37 with the main analysis to investigate the findings' robustness to the missing data assumptions. Safety,  
38  
39 including adverse events, infections and clinic visits, will be presented for the mothers and neonates,  
40  
41 respectively. The proportion of study participants with at least one safety outcome will be compared  
42  
43 between groups using a log-binomial regression model. A Poisson model with robust standard errors  
44  
45 will be fitted if there is a non-convergence of the log-binomial model for efficacy or safety outcomes.  
46  
47 Exploratory subgroup analyses (e.g., by parity, site, iron deficiency) will be performed for maternal  
48  
49 and neonatal outcomes, irrespective of their findings. The analyses models for all study outcomes will  
50  
51 adjust for the randomisation stratification variable of the site as a main effect.  
52  
53  
54  
55  
56  
57  
58  
59  
60

## Data Management

Data collected from the subjects are recorded in digital Case Report Forms (CRFs) using tablets. Relevant hard copy patient hospital files are scanned for reference and stored digitally, securely. An independent Data and Safety Monitoring Board has been established to regularly review the trial's progress and blinded and unblinded results. The Research Support Centre at the College of Medicine performs independent monitoring of the study on behalf of the sponsor. No interim analysis is planned.

## ETHICS AND DISSEMINATION

The College of Medicine Research Ethics Committee (COMREC), Blantyre, Malawi, and the Walter and Eliza Hall Institute of Medical Research Human Research Ethics Committee, Melbourne, Australia, approved this study. In addition, an evaluation was done by the Regional Ethics Committee West of Norway. They advised that the study was not subject to the Norwegian Health Research Act and that ethical review from this committee was not required. The trial is approved by the Malawian Pharmacy and Medicines Regulatory Authority (PMRA/CTRC/III/25052018100). Important protocol modifications such as changes to eligibility criteria or outcomes are reported to the ethics committees, regulatory authorities in Malawi, investigators, trial participants, trial registries. Witnessed informed written consent in English or Chichewa language is obtained from each participant before conducting any study-related procedure. The study is conducted under The International Conference on Harmonisation of Technical Requirements for Registration of Pharmaceuticals for Human Use (ICH) guidelines for "good clinical practice" (GCP) and the Declaration of Helsinki. The results will be presented to and shared with the local community that hosted and enabled the research, and also to

1  
2  
3 the international fora. We will publish in peer-reviewed scientific journals and report to relevant  
4  
5 policymaking bodies such as the Malawi Ministry of Health.  
6  
7  
8  
9  
10

## 11 **DISCUSSION**

12  
13  
14 Maternal anaemia prevalence is highest in sub-Saharan Africa and South Asia, and current approaches  
15  
16 to control it are failing. This trial will provide high quality, African-based evidence for clinicians,  
17  
18 policymakers and donors on a role for modern IV iron for antenatal anaemia in low-income settings.  
19  
20 This is the largest RCT program assessing new IV iron formulations in pregnancy and is of major  
21  
22 international significance in developing new global guidelines for anaemia in pregnancy. The results  
23  
24 of this study will be disseminated to local and national medical authorities, policymakers, and be  
25  
26 disseminated to the global research community, technical agencies, and international government  
27  
28 bodies via peer-reviewed journals and at international scientific fora.  
29  
30  
31  
32  
33  
34

### 35 **Author Contributions:**

36  
37 KSP, and S-RP were involved in conception and trial design. MNM wrote the first draft of the paper.  
38  
39 MNM, GM, EM, SB, RH and RA were involved in drafting of the article. SB and RH provided statistical  
40  
41 expertise. MNM, GM, EM, and KB were involved in study implementation and data acquisition. BR,  
42  
43 JS, WS, SR, JC and LL were involved in critical revision of the article for important intellectual  
44  
45 content. All the authors were involved in final approval of the article. Preparing study design,  
46  
47 collection, management, analysis and interpretation of data; writing of the report; and the decision  
48  
49 to submit the report for publication is the responsibility of the study sponsor. The study funder, the  
50  
51 Bill and Melinda Gates Foundation, had no role in the decision to publish.  
52  
53  
54  
55  
56  
57

58 **Funding statement:** This study is funded by the Bill & Melinda Gates Foundation OPP1169939.  
59  
60

**Acknowledgements:**

We acknowledge all the study participants for their willingness to participate in this study. We appreciate the dedication of the research staff in Blantyre, Zomba and Melbourne. We are grateful for the support we continue to receive from the District Health Offices in Blantyre and Zomba districts of Malawi. We acknowledge the collaboration with the Zomba Central Hospital, especially the office of the Hospital Director. We thank Dr Alinune Kabaghe and Dr Josephine Banda, who independently packed the trial drugs and delivered them to research sites. We also acknowledge the Dr Kamiza Histopathology Laboratory for analysing the placental samples.

**Competing interests statement.**

None to declare.

**Word Count:** 4,962

## References

1. World Health Organization. The global prevalence of anaemia in 2011. . In: World Health Organization, ed. Geneva, 2015.
2. Haider BA, Olofin I, Wang M, et al. Anaemia, prenatal iron use, and risk of adverse pregnancy outcomes: Systematic review and meta-analysis. *BMJ (Online)* 2013;347(7916) doi: 10.1136/bmj.f3443
3. Premru-Srsen T, Verdenik I, Ponikvar BM, et al. Infant mortality and causes of death by birth weight for gestational age in non-malformed singleton infants: a 2002-2012 population-based study. *J Perinat Med* 2018;46(5):547-53. doi: 10.1515/jpm-2017-0103 [published Online First: 2017/06/11]
4. World Health Organization, United Nations Children's Fund, United Nations University. Iron Deficiency Anaemia: Assessment, Prevention, and Control. A guide for programme managers. In: Organization. WH, ed. Geneva, 2001.
5. Daru J, Zamora J, Fernández-Félix BM, et al. Risk of maternal mortality in women with severe anaemia during pregnancy and post partum: a multilevel analysis. *Lancet Glob Health* 2018;6(5):e548-e54. doi: 10.1016/s2214-109x(18)30078-0 [published Online First: 2018/03/25]
6. Peña-Rosas JP, De-Regil LM, Garcia-Casal MN, et al. Daily oral iron supplementation during pregnancy. *Cochrane Database of Systematic Reviews* 2015;2015(7):1-527. doi: 10.1002/14651858.CD004736.pub5
7. Mwangi MN, Roth JM, Smit MR, et al. Effect of daily antenatal iron supplementation on plasmodium infection in kenyan women: A randomized clinical trial. *JAMA - Journal of the American Medical Association* 2015;314(10):1009-20. doi: 10.1001/jama.2015.9496
8. World Health Organization. Iron and folate supplementation. Integrated management of pregnancy and childbirth (IMPAC). . In: Organization WH, ed. Geneva, 2006.
9. World Health Organization. Essential Nutrition Actions: Improving maternal, newborn, infant and young child health and nutrition. . In: Organization. WH, ed. Geneva, 2013.
10. Low MSY, Speedy J, Styles CE, et al. Daily iron supplementation for improving anaemia, iron status and health in menstruating women. *Cochrane Database of Systematic Reviews* 2016;2016(4) doi: 10.1002/14651858.CD009747.pub2
11. Stoffel NU, Cercamondi CI, Brittenham G, et al. Iron absorption from oral iron supplements given on consecutive versus alternate days and as single morning doses versus twice-daily split dosing in iron-depleted women: two open-label, randomised controlled trials. *Lancet Haematol* 2017;4(11):e524-e33. doi: 10.1016/s2352-3026(17)30182-5 [published Online First: 2017/10/17]
12. National Statistical Office (NSO) [Malawi], ICF International. Malawi Demographic and Health Survey 2015-16: Key Indicators Report. In: NSO and ICF International, ed. Zomba, Malawi, and Rockville, Maryland, USA, 2016.
13. Bah A, Pasricha SR, Jallow MW, et al. Serum hepcidin concentrations decline during pregnancy and may identify iron deficiency: Analysis of a longitudinal pregnancy cohort in the Gambia. *Journal of Nutrition* 2017;147(6):1131-37. doi: 10.3945/jn.116.245373

14. Mkandawire P. Gestational Age at First Antenatal Care Visit in Malawi. *Matern Child Health J* 2015;19(11):2366-74. doi: 10.1007/s10995-015-1754-6 [published Online First: 2015/07/15]
15. Friedrisch JR, Caçado RD. Intravenous ferric carboxymaltose for the treatment of iron deficiency anemia. *Revista Brasileira de Hematologia e Hemoterapia* 2015;37(6):400-05. doi: 10.1016/j.bjhh.2015.08.012
16. Pasricha SR, Tye-Din J, Muckenthaler MU, et al. Iron deficiency. *Lancet* 2021;397(10270):233-48. doi: 10.1016/s0140-6736(20)32594-0 [published Online First: 2020/12/08]
17. Shand AW, Bell J, Henry A, et al. Rapid increase in intravenous iron therapy for women of reproductive age in Australia. *Med J Aust* 2020;213(2):85-86. doi: 10.5694/mja2.50618 [published Online First: 2020/05/27]
18. Qassim A, Grivell RM, Henry A, et al. Intravenous or oral iron for treating iron deficiency anaemia during pregnancy: systematic review and meta-analysis. *Med J Aust* 2019;211(8):367-73. doi: 10.5694/mja2.50308 [published Online First: 2019/08/24]
19. Achebe MM, Gafter-Gvili A. How I treat anemia in pregnancy: Iron, cobalamin, and folate. *Blood* 2017;129(8):940-49. doi: 10.1182/blood-2016-08-672246
20. Neogi SB, Devasenapathy N, Singh R, et al. Safety and effectiveness of intravenous iron sucrose versus standard oral iron therapy in pregnant women with moderate-to-severe anaemia in India: a multicentre, open-label, phase 3, randomised, controlled trial. *Lancet Glob Health* 2019;7(12):e1706-e16. doi: 10.1016/s2214-109x(19)30427-9 [published Online First: 2019/11/12]
21. Ortiz R, Toblli JE, Romero JD, et al. Efficacy and safety of oral iron(III) polymaltose complex versus ferrous sulfate in pregnant women with iron-deficiency anemia: a multicenter, randomized, controlled study. *J Matern Fetal Neonatal Med* 2011;24(11):1347-52. doi: 10.3109/14767058.2011.599080 [published Online First: 2011/08/24]
22. Vanobberghen F, Lweno O, Kuemmerle A, et al. Efficacy and safety of intravenous ferric carboxymaltose compared with oral iron for the treatment of iron deficiency anaemia in women after childbirth in Tanzania: a parallel-group, open-label, randomised controlled phase 3 trial. *Lancet Glob Health* 2021;9(2):e189-e98. doi: 10.1016/s2214-109x(20)30448-4 [published Online First: 2020/11/28]
23. World Bank. Prevalence of low birthweight babies (% of births) - Malawi Washington DC, USA2021 [21 August 2021]. Available from: <https://data.worldbank.org/indicator/SH.STA.BRTW.ZS?locations=MW>.
24. Boudová S, Divala T, Mawindo P, et al. The prevalence of malaria at first antenatal visit in Blantyre, Malawi declined following a universal bed net campaign. *Malar J* 2015;14:422. doi: 10.1186/s12936-015-0945-3 [published Online First: 2015/10/30]
25. Young MF, Oaks BM, Tandon S, et al. Maternal hemoglobin concentrations across pregnancy and maternal and child health: a systematic review and meta-analysis. *Ann N Y Acad Sci* 2019;1450(1):47-68. doi: 10.1111/nyas.14093 [published Online First: 2019/04/18]
26. Breyman C, Milman N, Mezzacasa A, et al. Ferric carboxymaltose vs. oral iron in the treatment of pregnant women with iron deficiency anemia: An international, open-label, randomized controlled trial (FER-ASAP). *Journal of Perinatal Medicine* 2017;45(4):443-53. doi: 10.1515/jpm-2016-0050



- 1  
2  
3 27. Liang K-Y, Zeger SL. Longitudinal data analysis of continuous and discrete responses for  
4 pre-post designs *Sankhyā: The Indian Journal of Statistics* 2000;Series B:134-48. doi:  
5 doi: <https://www.jstor.org/stable/25053123>  
6  
7  
8  
9  
10  
11  
12  
13  
14  
15  
16  
17  
18  
19  
20  
21  
22  
23  
24  
25  
26  
27  
28  
29  
30  
31  
32  
33  
34  
35  
36  
37  
38  
39  
40  
41  
42  
43  
44  
45  
46  
47  
48  
49  
50  
51  
52  
53  
54  
55  
56  
57  
58  
59  
60

For peer review only

1  
2  
3 **Figure heading, caption and legend**  
4

5  
6 **Figure 1**  
7

8 **Figure caption and legend:** REVAMP Trial schema. V0 – visit 0; V1 – Visit 1; V2 – Visit 2; V4 – Visit 4; V7 – Visit 7;  
9  
10 V8 – Visit 8; Abbreviations: iv – Intravenous; wks – weeks.  
11  
12  
13  
14  
15  
16  
17  
18  
19  
20  
21  
22  
23  
24  
25  
26  
27  
28  
29  
30  
31  
32  
33  
34  
35  
36  
37  
38  
39  
40  
41  
42  
43  
44  
45  
46  
47  
48  
49  
50  
51  
52  
53  
54  
55  
56  
57  
58  
59  
60

For peer review only



REVAMP Trial schema. V0 – visit 0; V1 – Visit 1; V2 – Visit 2; V4 – Visit 4; V7 – Visit 7; V8 – Visit 8; Abbreviations: iv – Intravenous; wks – weeks.

# Reporting checklist for protocol of a clinical trial.

Based on the SPIRIT guidelines.

## Instructions to authors

Complete this checklist by entering the page numbers from your manuscript where readers will find each of the items listed below.

Your article may not currently address all the items on the checklist. Please modify your text to include the missing information. If you are certain that an item does not apply, please write "n/a" and provide a short explanation.

Upload your completed checklist as an extra file when you submit to a journal.

In your methods section, say that you used the SPIRIT reporting guidelines, and cite them as:

Chan A-W, Tetzlaff JM, Gøtzsche PC, Altman DG, Mann H, Berlin J, Dickersin K, Hróbjartsson A, Schulz KF, Parulekar WR, Krleža-Jerić K, Laupacis A, Moher D. SPIRIT 2013 Explanation and Elaboration: Guidance for protocols of clinical trials. *BMJ*. 2013;346:e7586

|                                                         | Reporting Item                                                                                                                                | Page Number |
|---------------------------------------------------------|-----------------------------------------------------------------------------------------------------------------------------------------------|-------------|
| <b>Administrative information</b>                       |                                                                                                                                               |             |
| Title                                                   | <a href="#">#1</a> Descriptive title identifying the study design, population, interventions, and, if applicable, trial acronym               | 1           |
| Trial registration                                      | <a href="#">#2a</a> Trial identifier and registry name. If not yet registered, name of intended registry                                      | 2 & 4       |
| Trial registration: data set                            | <a href="#">#2b</a> All items from the World Health Organization Trial Registration Data Set                                                  | 4           |
| Protocol version                                        | <a href="#">#3</a> Date and version identifier                                                                                                | 4           |
| Funding                                                 | <a href="#">#4</a> Sources and types of financial, material, and other support                                                                | 26          |
| Roles and responsibilities: contributorship             | <a href="#">#5a</a> Names, affiliations, and roles of protocol contributors                                                                   | 1 & 2       |
| Roles and responsibilities: sponsor contact information | <a href="#">#5b</a> Name and contact information for the trial sponsor                                                                        | 4           |
| Roles and responsibilities:                             | <a href="#">#5c</a> Role of study sponsor and funders, if any, in study design; collection, management, analysis, and interpretation of data; | 4           |

|    |                                                           |                      |                                                                    |       |
|----|-----------------------------------------------------------|----------------------|--------------------------------------------------------------------|-------|
| 1  | sponsor and funder                                        |                      | writing of the report; and the decision to submit the report for   |       |
| 2  |                                                           |                      | publication, including whether they will have ultimate authority   |       |
| 3  |                                                           |                      | over any of these activities                                       |       |
| 4  |                                                           |                      |                                                                    |       |
| 5  | Roles and                                                 | <a href="#">#5d</a>  | Composition, roles, and responsibilities of the coordinating       | 19    |
| 6  | responsibilities:                                         |                      | centre, steering committee, endpoint adjudication committee,       |       |
| 7  | committees                                                |                      | data management team, and other individuals or groups              |       |
| 8  |                                                           |                      | overseeing the trial, if applicable (see Item 21a for data         |       |
| 9  |                                                           |                      | monitoring committee)                                              |       |
| 10 |                                                           |                      |                                                                    |       |
| 11 |                                                           |                      |                                                                    |       |
| 12 |                                                           |                      |                                                                    |       |
| 13 | <b>Introduction</b>                                       |                      |                                                                    |       |
| 14 |                                                           |                      |                                                                    |       |
| 15 | Background and                                            | <a href="#">#6a</a>  | Description of research question and justification for undertaking | 7     |
| 16 | rationale                                                 |                      | the trial, including summary of relevant studies (published and    |       |
| 17 |                                                           |                      | unpublished) examining benefits and harms for each intervention    |       |
| 18 |                                                           |                      |                                                                    |       |
| 19 |                                                           |                      |                                                                    |       |
| 20 | Background and                                            | <a href="#">#6b</a>  | Explanation for choice of comparators                              | 20    |
| 21 | rationale: choice of                                      |                      |                                                                    |       |
| 22 | comparators                                               |                      |                                                                    |       |
| 23 |                                                           |                      |                                                                    |       |
| 24 |                                                           |                      |                                                                    |       |
| 25 | Objectives                                                | <a href="#">#7</a>   | Specific objectives or hypotheses                                  | 9,10  |
| 26 |                                                           |                      |                                                                    |       |
| 27 | Trial design                                              | <a href="#">#8</a>   | Description of trial design including type of trial (eg, parallel  | 10    |
| 28 |                                                           |                      | group, crossover, factorial, single group), allocation ratio, and  |       |
| 29 |                                                           |                      | framework (eg, superiority, equivalence, non-inferiority,          |       |
| 30 |                                                           |                      | exploratory)                                                       |       |
| 31 |                                                           |                      |                                                                    |       |
| 32 |                                                           |                      |                                                                    |       |
| 33 | <b>Methods: Participants, interventions, and outcomes</b> |                      |                                                                    |       |
| 34 |                                                           |                      |                                                                    |       |
| 35 | Study setting                                             | <a href="#">#9</a>   | Description of study settings (eg, community clinic, academic      | 10,11 |
| 36 |                                                           |                      | hospital) and list of countries where data will be collected.      |       |
| 37 |                                                           |                      | Reference to where list of study sites can be obtained             |       |
| 38 |                                                           |                      |                                                                    |       |
| 39 |                                                           |                      |                                                                    |       |
| 40 | Eligibility criteria                                      | <a href="#">#10</a>  | Inclusion and exclusion criteria for participants. If applicable,  | 11,12 |
| 41 |                                                           |                      | eligibility criteria for study centres and individuals who will    |       |
| 42 |                                                           |                      | perform the interventions (eg, surgeons, psychotherapists)         |       |
| 43 |                                                           |                      |                                                                    |       |
| 44 |                                                           |                      |                                                                    |       |
| 45 | Interventions:                                            | <a href="#">#11a</a> | Interventions for each group with sufficient detail to allow       | 12,13 |
| 46 | description                                               |                      | replication, including how and when they will be administered      |       |
| 47 |                                                           |                      |                                                                    |       |
| 48 |                                                           |                      |                                                                    |       |
| 49 | Interventions:                                            | <a href="#">#11b</a> | Criteria for discontinuing or modifying allocated interventions    | 13    |
| 50 | modifications                                             |                      | for a given trial participant (eg, drug dose change in response to |       |
| 51 |                                                           |                      | harms, participant request, or improving / worsening disease)      |       |
| 52 |                                                           |                      |                                                                    |       |
| 53 |                                                           |                      |                                                                    |       |
| 54 | Interventions:                                            | <a href="#">#11c</a> | Strategies to improve adherence to intervention protocols, and     | 13    |
| 55 | adherence                                                 |                      | any procedures for monitoring adherence (eg, drug tablet return;   |       |
| 56 |                                                           |                      | laboratory tests)                                                  |       |
| 57 |                                                           |                      |                                                                    |       |
| 58 |                                                           |                      |                                                                    |       |
| 59 |                                                           |                      |                                                                    |       |
| 60 |                                                           |                      |                                                                    |       |

|    |                  |                      |                                                                  |        |
|----|------------------|----------------------|------------------------------------------------------------------|--------|
| 1  | Interventions:   | <a href="#">#11d</a> | Relevant concomitant care and interventions that are permitted   | 13     |
| 2  | concomitant care |                      | or prohibited during the trial                                   |        |
| 3  |                  |                      |                                                                  |        |
| 4  | Outcomes         | <a href="#">#12</a>  | Primary, secondary, and other outcomes, including the specific   | 21     |
| 5  |                  |                      | measurement variable (eg, systolic blood pressure), analysis     |        |
| 6  |                  |                      | metric (eg, change from baseline, final value, time to event),   |        |
| 7  |                  |                      | method of aggregation (eg, median, proportion), and time point   |        |
| 8  |                  |                      | for each outcome. Explanation of the clinical relevance of       |        |
| 9  |                  |                      | chosen efficacy and harm outcomes is strongly recommended        |        |
| 10 |                  |                      |                                                                  |        |
| 11 |                  |                      |                                                                  |        |
| 12 |                  |                      |                                                                  |        |
| 13 | Participant      | <a href="#">#13</a>  | Time schedule of enrolment, interventions (including any run-ins | 10,18, |
| 14 | timeline         |                      | and washouts), assessments, and visits for participants. A       |        |
| 15 |                  |                      | schematic diagram is highly recommended (see Figure)             | 19,20  |
| 16 |                  |                      |                                                                  |        |
| 17 |                  |                      |                                                                  |        |
| 18 | Sample size      | <a href="#">#14</a>  | Estimated number of participants needed to achieve study         | 22, 23 |
| 19 |                  |                      | objectives and how it was determined, including clinical and     |        |
| 20 |                  |                      | statistical assumptions supporting any sample size calculations  |        |
| 21 |                  |                      |                                                                  |        |
| 22 |                  |                      |                                                                  |        |
| 23 | Recruitment      | <a href="#">#15</a>  | Strategies for achieving adequate participant enrolment to reach | 18     |
| 24 |                  |                      | target sample size                                               |        |
| 25 |                  |                      |                                                                  |        |
| 26 |                  |                      |                                                                  |        |

### 27 **Methods: Assignment of interventions (for controlled trials)**

|    |                    |                      |                                                                    |       |
|----|--------------------|----------------------|--------------------------------------------------------------------|-------|
| 28 |                    |                      |                                                                    |       |
| 29 | Allocation:        | <a href="#">#16a</a> | Method of generating the allocation sequence (eg, computer-        | 13    |
| 30 | sequence           |                      | generated random numbers), and list of any factors for             |       |
| 31 | generation         |                      | stratification. To reduce predictability of a random sequence,     |       |
| 32 |                    |                      | details of any planned restriction (eg, blocking) should be        |       |
| 33 |                    |                      | provided in a separate document that is unavailable to those who   |       |
| 34 |                    |                      | enrol participants or assign interventions                         |       |
| 35 |                    |                      |                                                                    |       |
| 36 |                    |                      |                                                                    |       |
| 37 |                    |                      |                                                                    |       |
| 38 | Allocation         | <a href="#">#16b</a> | Mechanism of implementing the allocation sequence (eg, central     | 13    |
| 39 | concealment        |                      | telephone; sequentially numbered, opaque, sealed envelopes),       |       |
| 40 | mechanism          |                      | describing any steps to conceal the sequence until interventions   |       |
| 41 |                    |                      | are assigned                                                       |       |
| 42 |                    |                      |                                                                    |       |
| 43 |                    |                      |                                                                    |       |
| 44 | Allocation:        | <a href="#">#16c</a> | Who will generate the allocation sequence, who will enrol          | 13    |
| 45 | implementation     |                      | participants, and who will assign participants to interventions    |       |
| 46 |                    |                      |                                                                    |       |
| 47 |                    |                      |                                                                    |       |
| 48 | Blinding (masking) | <a href="#">#17a</a> | Who will be blinded after assignment to interventions (eg, trial   | 13,14 |
| 49 |                    |                      | participants, care providers, outcome assessors, data analysts),   |       |
| 50 |                    |                      | and how                                                            |       |
| 51 |                    |                      |                                                                    |       |
| 52 |                    |                      |                                                                    |       |
| 53 | Blinding           | <a href="#">#17b</a> | If blinded, circumstances under which unblinding is permissible,   | 13,14 |
| 54 | (masking):         |                      | and procedure for revealing a participant's allocated intervention |       |
| 55 | emergency          |                      | during the trial                                                   |       |
| 56 | unblinding         |                      |                                                                    |       |
| 57 |                    |                      |                                                                    |       |
| 58 |                    |                      |                                                                    |       |
| 59 |                    |                      |                                                                    |       |

## 1 **Methods: Data collection, management, and analysis**

|    |                      |                      |                                                                                 |
|----|----------------------|----------------------|---------------------------------------------------------------------------------|
| 2  |                      |                      |                                                                                 |
| 3  | Data collection      | <a href="#">#18a</a> | Plans for assessment and collection of outcome, baseline, and 20                |
| 4  | plan                 |                      | other trial data, including any related processes to promote data               |
| 5  |                      |                      | quality (eg, duplicate measurements, training of assessors) and a               |
| 6  |                      |                      | description of study instruments (eg, questionnaires, laboratory                |
| 7  |                      |                      | tests) along with their reliability and validity, if known.                     |
| 8  |                      |                      | Reference to where data collection forms can be found, if not in                |
| 9  |                      |                      | the protocol                                                                    |
| 10 |                      |                      |                                                                                 |
| 11 | Data collection      | <a href="#">#18b</a> | Plans to promote participant retention and complete follow-up, 20,21            |
| 12 | plan: retention      |                      | including list of any outcome data to be collected for participants             |
| 13 |                      |                      | who discontinue or deviate from intervention protocols                          |
| 14 |                      |                      |                                                                                 |
| 15 | Data management      | <a href="#">#19</a>  | Plans for data entry, coding, security, and storage, including any 24           |
| 16 |                      |                      | related processes to promote data quality (eg, double data entry;               |
| 17 |                      |                      | range checks for data values). Reference to where details of data               |
| 18 |                      |                      | management procedures can be found, if not in the protocol                      |
| 19 |                      |                      |                                                                                 |
| 20 | Statistics:          | <a href="#">#20a</a> | Statistical methods for analysing primary and secondary 23                      |
| 21 | outcomes             |                      | outcomes. Reference to where other details of the statistical                   |
| 22 |                      |                      | analysis plan can be found, if not in the protocol                              |
| 23 |                      |                      |                                                                                 |
| 24 | Statistics:          | <a href="#">#20b</a> | Methods for any additional analyses (eg, subgroup and adjusted n/a: statistical |
| 25 | additional analyses  |                      | analyses) analysis plan to                                                      |
| 26 |                      |                      | be published                                                                    |
| 27 |                      |                      | separately                                                                      |
| 28 |                      |                      |                                                                                 |
| 29 | Statistics: analysis | <a href="#">#20c</a> | Definition of analysis population relating to protocol non- 23 (SAP to be       |
| 30 | population and       |                      | adherence (eg, as randomised analysis), and any statistical published           |
| 31 | missing data         |                      | methods to handle missing data (eg, multiple imputation) separately)            |
| 32 |                      |                      |                                                                                 |
| 33 |                      |                      |                                                                                 |
| 34 |                      |                      |                                                                                 |
| 35 |                      |                      |                                                                                 |
| 36 |                      |                      |                                                                                 |
| 37 |                      |                      |                                                                                 |
| 38 |                      |                      |                                                                                 |
| 39 |                      |                      |                                                                                 |
| 40 |                      |                      |                                                                                 |

## 41 **Methods:**

## 42 **Monitoring**

|    |                  |                      |                                                                          |
|----|------------------|----------------------|--------------------------------------------------------------------------|
| 43 |                  |                      |                                                                          |
| 44 | Data monitoring: | <a href="#">#21a</a> | Composition of data monitoring committee (DMC); summary of 19            |
| 45 | formal committee |                      | its role and reporting structure; statement of whether it is             |
| 46 |                  |                      | independent from the sponsor and competing interests; and                |
| 47 |                  |                      | reference to where further details about its charter can be found,       |
| 48 |                  |                      | if not in the protocol. Alternatively, an explanation of why a           |
| 49 |                  |                      | DMC is not needed                                                        |
| 50 |                  |                      |                                                                          |
| 51 | Data monitoring: | <a href="#">#21b</a> | Description of any interim analyses and stopping guidelines, 23,24       |
| 52 | interim analysis |                      | including who will have access to these interim results and make         |
| 53 |                  |                      | the final decision to terminate the trial                                |
| 54 |                  |                      |                                                                          |
| 55 | Harms            | <a href="#">#22</a>  | Plans for collecting, assessing, reporting, and managing solicited 21,22 |
| 56 |                  |                      |                                                                          |
| 57 |                  |                      |                                                                          |
| 58 |                  |                      |                                                                          |
| 59 |                  |                      |                                                                          |
| 60 |                  |                      |                                                                          |

|    |                                      |                                                                                                                                                                                                                                                                                                          |                              |
|----|--------------------------------------|----------------------------------------------------------------------------------------------------------------------------------------------------------------------------------------------------------------------------------------------------------------------------------------------------------|------------------------------|
|    |                                      | and spontaneously reported adverse events and other unintended effects of trial interventions or trial conduct                                                                                                                                                                                           |                              |
| 1  |                                      |                                                                                                                                                                                                                                                                                                          |                              |
| 2  |                                      |                                                                                                                                                                                                                                                                                                          |                              |
| 3  |                                      |                                                                                                                                                                                                                                                                                                          |                              |
| 4  | Auditing                             | <a href="#">#23</a> Frequency and procedures for auditing trial conduct, if any, and whether the process will be independent from investigators and the sponsor                                                                                                                                          | 19                           |
| 5  |                                      |                                                                                                                                                                                                                                                                                                          |                              |
| 6  |                                      |                                                                                                                                                                                                                                                                                                          |                              |
| 7  |                                      |                                                                                                                                                                                                                                                                                                          |                              |
| 8  |                                      |                                                                                                                                                                                                                                                                                                          |                              |
| 9  | <b>Ethics and dissemination</b>      |                                                                                                                                                                                                                                                                                                          |                              |
| 10 |                                      |                                                                                                                                                                                                                                                                                                          |                              |
| 11 | Research ethics approval             | <a href="#">#24</a> Plans for seeking research ethics committee / institutional review board (REC / IRB) approval                                                                                                                                                                                        | 4                            |
| 12 |                                      |                                                                                                                                                                                                                                                                                                          |                              |
| 13 |                                      |                                                                                                                                                                                                                                                                                                          |                              |
| 14 | Protocol amendments                  | <a href="#">#25</a> Plans for communicating important protocol modifications (eg, changes to eligibility criteria, outcomes, analyses) to relevant parties (eg, investigators, REC / IRBs, trial participants, trial registries, journals, regulators)                                                   | 4                            |
| 15 |                                      |                                                                                                                                                                                                                                                                                                          |                              |
| 16 |                                      |                                                                                                                                                                                                                                                                                                          |                              |
| 17 |                                      |                                                                                                                                                                                                                                                                                                          |                              |
| 18 |                                      |                                                                                                                                                                                                                                                                                                          |                              |
| 19 |                                      |                                                                                                                                                                                                                                                                                                          |                              |
| 20 | Consent or assent                    | <a href="#">#26a</a> Who will obtain informed consent or assent from potential trial participants or authorised surrogates, and how (see Item 32)                                                                                                                                                        | See supplementary material 1 |
| 21 |                                      |                                                                                                                                                                                                                                                                                                          |                              |
| 22 |                                      |                                                                                                                                                                                                                                                                                                          |                              |
| 23 |                                      |                                                                                                                                                                                                                                                                                                          |                              |
| 24 |                                      |                                                                                                                                                                                                                                                                                                          |                              |
| 25 | Consent or assent: ancillary studies | <a href="#">#26b</a> Additional consent provisions for collection and use of participant data and biological specimens in ancillary studies, if applicable                                                                                                                                               | See supp. Material 1         |
| 26 |                                      |                                                                                                                                                                                                                                                                                                          |                              |
| 27 |                                      |                                                                                                                                                                                                                                                                                                          |                              |
| 28 |                                      |                                                                                                                                                                                                                                                                                                          |                              |
| 29 |                                      |                                                                                                                                                                                                                                                                                                          |                              |
| 30 | Confidentiality                      | <a href="#">#27</a> How personal information about potential and enrolled participants will be collected, shared, and maintained in order to protect confidentiality before, during, and after the trial                                                                                                 | 23,24                        |
| 31 |                                      |                                                                                                                                                                                                                                                                                                          |                              |
| 32 |                                      |                                                                                                                                                                                                                                                                                                          |                              |
| 33 |                                      |                                                                                                                                                                                                                                                                                                          |                              |
| 34 |                                      |                                                                                                                                                                                                                                                                                                          |                              |
| 35 | Declaration of interests             | <a href="#">#28</a> Financial and other competing interests for principal investigators for the overall trial and each study site                                                                                                                                                                        | 25                           |
| 36 |                                      |                                                                                                                                                                                                                                                                                                          |                              |
| 37 |                                      |                                                                                                                                                                                                                                                                                                          |                              |
| 38 |                                      |                                                                                                                                                                                                                                                                                                          |                              |
| 39 | Data access                          | <a href="#">#29</a> Statement of who will have access to the final trial dataset, and disclosure of contractual agreements that limit such access for investigators                                                                                                                                      | 23,24                        |
| 40 |                                      |                                                                                                                                                                                                                                                                                                          |                              |
| 41 |                                      |                                                                                                                                                                                                                                                                                                          |                              |
| 42 |                                      |                                                                                                                                                                                                                                                                                                          |                              |
| 43 |                                      |                                                                                                                                                                                                                                                                                                          |                              |
| 44 | Ancillary and post trial care        | <a href="#">#30</a> Provisions, if any, for ancillary and post-trial care, and for compensation to those who suffer harm from trial participation                                                                                                                                                        | 21                           |
| 45 |                                      |                                                                                                                                                                                                                                                                                                          |                              |
| 46 |                                      |                                                                                                                                                                                                                                                                                                          |                              |
| 47 | Dissemination policy: trial results  | <a href="#">#31a</a> Plans for investigators and sponsor to communicate trial results to participants, healthcare professionals, the public, and other relevant groups (eg, via publication, reporting in results databases, or other data sharing arrangements), including any publication restrictions | 8,24                         |
| 48 |                                      |                                                                                                                                                                                                                                                                                                          |                              |
| 49 |                                      |                                                                                                                                                                                                                                                                                                          |                              |
| 50 |                                      |                                                                                                                                                                                                                                                                                                          |                              |
| 51 |                                      |                                                                                                                                                                                                                                                                                                          |                              |
| 52 |                                      |                                                                                                                                                                                                                                                                                                          |                              |
| 53 |                                      |                                                                                                                                                                                                                                                                                                          |                              |
| 54 |                                      |                                                                                                                                                                                                                                                                                                          |                              |
| 55 | Dissemination policy: authorship     | <a href="#">#31b</a> Authorship eligibility guidelines and any intended use of professional writers                                                                                                                                                                                                      | 24                           |
| 56 |                                      |                                                                                                                                                                                                                                                                                                          |                              |
| 57 |                                      |                                                                                                                                                                                                                                                                                                          |                              |
| 58 |                                      |                                                                                                                                                                                                                                                                                                          |                              |
| 59 |                                      |                                                                                                                                                                                                                                                                                                          |                              |
| 60 |                                      |                                                                                                                                                                                                                                                                                                          |                              |



1 Dissemination [#31c](#) Plans, if any, for granting public access to the full protocol, n/a; statistical  
 2 policy: participant-level dataset, and statistical code analyses plan to  
 3 reproducible be published  
 4 research separately  
 5

## 7 Appendices

9 Informed consent [#32](#) Model consent form and other related documentation given to Supplementary  
 10 materials participants and authorised surrogates material 1

13 Biological [#33](#) Plans for collection, laboratory evaluation, and storage of 14,15, 16  
 14 specimens biological specimens for genetic or molecular analysis in the  
 15 current trial and for future use in ancillary studies, if applicable  
 16

18 None The SPIRIT Explanation and Elaboration paper is distributed under the terms of the Creative Commons Attribution  
 19 License CC-BY-NC. This checklist can be completed online using <https://www.goodreports.org/>, a tool made by the  
 20 [EQUATOR Network](#) in collaboration with [Penelope.ai](#)  
 21

# BMJ Open

## Protocol for a multicentre, parallel-group, open-label randomised controlled trial comparing ferric carboxymaltose with the standard of care in anaemic Malawian pregnant women – The REVAMP trial

|                               |                                                                                                                                                                                                                                                                                                                                                                                                                                                                                                                                                                                                                                                                                                                                                                                                                                                                                                                                                                                                                                                                                                                                                                                                                                                                                                                                                                                                                                                                                                                                                                                                                                                                                                                                                                                                                                                                                                                                                                                                                                                                                                                                                                                                                                                                                                                                                                                                                                                                       |
|-------------------------------|-----------------------------------------------------------------------------------------------------------------------------------------------------------------------------------------------------------------------------------------------------------------------------------------------------------------------------------------------------------------------------------------------------------------------------------------------------------------------------------------------------------------------------------------------------------------------------------------------------------------------------------------------------------------------------------------------------------------------------------------------------------------------------------------------------------------------------------------------------------------------------------------------------------------------------------------------------------------------------------------------------------------------------------------------------------------------------------------------------------------------------------------------------------------------------------------------------------------------------------------------------------------------------------------------------------------------------------------------------------------------------------------------------------------------------------------------------------------------------------------------------------------------------------------------------------------------------------------------------------------------------------------------------------------------------------------------------------------------------------------------------------------------------------------------------------------------------------------------------------------------------------------------------------------------------------------------------------------------------------------------------------------------------------------------------------------------------------------------------------------------------------------------------------------------------------------------------------------------------------------------------------------------------------------------------------------------------------------------------------------------------------------------------------------------------------------------------------------------|
| Journal:                      | <i>BMJ Open</i>                                                                                                                                                                                                                                                                                                                                                                                                                                                                                                                                                                                                                                                                                                                                                                                                                                                                                                                                                                                                                                                                                                                                                                                                                                                                                                                                                                                                                                                                                                                                                                                                                                                                                                                                                                                                                                                                                                                                                                                                                                                                                                                                                                                                                                                                                                                                                                                                                                                       |
| Manuscript ID                 | bmjopen-2021-053288.R2                                                                                                                                                                                                                                                                                                                                                                                                                                                                                                                                                                                                                                                                                                                                                                                                                                                                                                                                                                                                                                                                                                                                                                                                                                                                                                                                                                                                                                                                                                                                                                                                                                                                                                                                                                                                                                                                                                                                                                                                                                                                                                                                                                                                                                                                                                                                                                                                                                                |
| Article Type:                 | Protocol                                                                                                                                                                                                                                                                                                                                                                                                                                                                                                                                                                                                                                                                                                                                                                                                                                                                                                                                                                                                                                                                                                                                                                                                                                                                                                                                                                                                                                                                                                                                                                                                                                                                                                                                                                                                                                                                                                                                                                                                                                                                                                                                                                                                                                                                                                                                                                                                                                                              |
| Date Submitted by the Author: | 14-Oct-2021                                                                                                                                                                                                                                                                                                                                                                                                                                                                                                                                                                                                                                                                                                                                                                                                                                                                                                                                                                                                                                                                                                                                                                                                                                                                                                                                                                                                                                                                                                                                                                                                                                                                                                                                                                                                                                                                                                                                                                                                                                                                                                                                                                                                                                                                                                                                                                                                                                                           |
| Complete List of Authors:     | <p>Mwangi, Martin; University of Malawi College of Medicine; Training and Research Unit of Excellence (TRUE), Nutrition and Infectious Diseases Mzembe, Glory; University of Malawi College of Medicine, Training and Research Unit of Excellence (TRUE); University of Malawi College of Medicine, School of Public Health and Family Medicine, Department of Public Health</p> <p>Moya, Ernest; University of Malawi College of Medicine, Training and Research Unit of Excellence (TRUE); University of Malawi College of Medicine, School of Public Health and Family Medicine, Department of Public Health</p> <p>Braat, Sabine ; University of Melbourne School of Population and Global Health, Centre for Epidemiology and Biostatistics; The University of Melbourne Melbourne Medical School, Department of Infectious Diseases</p> <p>Harding, Rebecca; The Walter and Eliza Hall Institute of Medical Research, Population Health and Immunity Division,</p> <p>Robberstad, Bjarne; University of Bergen, Department of Global Public Health and Primary Care</p> <p>Simpson, Julie; University of Melbourne School of Population and Global Health, Centre for Epidemiology and Biostatistics</p> <p>Stones, William; University of Malawi, Obstetrics &amp; Gynaecology</p> <p>Rogerson, Stephen; University of Melbourne, Department of Medicine at the Peter Doherty Institute for Infection and Immunity; The University of Melbourne Melbourne Medical School, Department of Infectious Diseases</p> <p>Biselele, Kabeya; Zomba Central Hospital</p> <p>Chinkhumba, Jobiba; University of Malawi College of Medicine, Malaria Alert Centre</p> <p>Larson, Leila; University of South Carolina Arnold School of Public Health, Department of Health Promotion, Education, and Behavior</p> <p>Ataide, Ricardo; The Walter and Eliza Hall Institute of Medical Research, Population Health and Immunity Division; The University of Melbourne, Department of Infectious Diseases</p> <p>Phiri, Kamija; University of Malawi College of Medicine, Training and Research Unit of Excellence (TRUE); University of Malawi College of Medicine, School of Public Health and Family Medicine, Department of Public Health</p> <p>Pasricha, Sant-Rayn; Walter and Eliza Hall Institute of Medical Research, Population Health and Immunity Division; The Royal Melbourne Hospital, Diagnostic Haematology and Clinical Haematology, The Peter MacCallum</p> |

1  
2  
3  
4  
5  
6  
7  
8  
9  
10  
11  
12  
13  
14  
15  
16  
17  
18  
19  
20  
21  
22  
23  
24  
25  
26  
27  
28  
29  
30  
31  
32  
33  
34  
35  
36  
37  
38  
39  
40  
41  
42  
43  
44  
45  
46  
47  
48  
49  
50  
51  
52  
53  
54  
55  
56  
57  
58  
59  
60

|                                   |                                                                                                                                                                           |
|-----------------------------------|---------------------------------------------------------------------------------------------------------------------------------------------------------------------------|
|                                   | Cancer Centre                                                                                                                                                             |
| <b>Primary Subject Heading:</b>   | Haematology (incl blood transfusion)                                                                                                                                      |
| <b>Secondary Subject Heading:</b> | Global health, Nutrition and metabolism, Public health, Infectious diseases, Epidemiology                                                                                 |
| <b>Keywords:</b>                  | Anaemia < HAEMATOLOGY, Nutrition < TROPICAL MEDICINE, Epidemiology < TROPICAL MEDICINE, Clinical trials < THERAPEUTICS, PUBLIC HEALTH, Epidemiology < INFECTIOUS DISEASES |
|                                   |                                                                                                                                                                           |

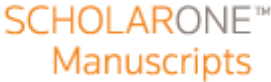



I, the Submitting Author has the right to grant and does grant on behalf of all authors of the Work (as defined in the below author licence), an exclusive licence and/or a non-exclusive licence for contributions from authors who are: i) UK Crown employees; ii) where BMJ has agreed a CC-BY licence shall apply, and/or iii) in accordance with the terms applicable for US Federal Government officers or employees acting as part of their official duties; on a worldwide, perpetual, irrevocable, royalty-free basis to BMJ Publishing Group Ltd ("BMJ") its licensees and where the relevant Journal is co-owned by BMJ to the co-owners of the Journal, to publish the Work in this journal and any other BMJ products and to exploit all rights, as set out in our [licence](#).

The Submitting Author accepts and understands that any supply made under these terms is made by BMJ to the Submitting Author unless you are acting as an employee on behalf of your employer or a postgraduate student of an affiliated institution which is paying any applicable article publishing charge ("APC") for Open Access articles. Where the Submitting Author wishes to make the Work available on an Open Access basis (and intends to pay the relevant APC), the terms of reuse of such Open Access shall be governed by a Creative Commons licence – details of these licences and which [Creative Commons](#) licence will apply to this Work are set out in our licence referred to above.

Other than as permitted in any relevant BMJ Author's Self Archiving Policies, I confirm this Work has not been accepted for publication elsewhere, is not being considered for publication elsewhere and does not duplicate material already published. I confirm all authors consent to publication of this Work and authorise the granting of this licence.

1  
2  
3  
4  
5 **Protocol for a multicentre, parallel-group, open-label randomised controlled trial comparing ferric**  
6 **carboxymaltose with the standard of care in anaemic Malawian pregnant women – The REVAMP**  
7 **trial**  
8  
9  
10  
11  
12  
13  
14

15 **Authors**

16 Martin N Mwangi<sup>1,2</sup>, Glory Mzembe<sup>1,2</sup>, Ernest Moya<sup>1,2</sup>, Sabine Braat<sup>3,4,5</sup>, Rebecca Harding<sup>3</sup>, Bjarne  
17 Robberstad<sup>6</sup>, Julie Simpson<sup>5</sup>, William Stones<sup>2</sup>, Stephen Rogerson<sup>4,7</sup>, Kabeya Biselele<sup>8</sup>, Jobiba  
18 Chinkhumba<sup>9</sup>, Leila Larson<sup>10</sup>, Ricardo Ataíde<sup>3,4</sup>, Kamija S Phiri<sup>1,2</sup>, Sant-Rayn Pasricha<sup>3,11,12</sup>  
19  
20  
21  
22  
23  
24  
25  
26  
27

28 **Institutions**

- 29  
30  
31  
32  
33  
34  
35  
36  
37  
38  
39  
40  
41  
42  
43  
44  
45  
46  
47  
48  
49  
50  
51  
52  
53  
54  
55  
56  
57  
58  
59  
60
1. Training and Research Unit of Excellence (TRUE), Mandala, No. 1 Kufa Road, Chichiri, BT3, Blantyre, Malawi.
  2. School of Public Health and Family Medicine, Department of Public Health, Kamuzu University of Health Sciences (KUHeS), Chichiri, BT3, Blantyre, Malawi.
  3. Population Health and Immunity Division, The Walter and Eliza Hall Institute of Medical Research, 1G Royal Parade, Parkville, Melbourne 3052, Australia.
  4. Department of Infectious Diseases, Melbourne Medical School, The University of Melbourne, Melbourne, Australia.
  5. Centre for Epidemiology and Biostatistics, Melbourne School of Population and Global Health, The University of Melbourne, Melbourne, Australia.
  6. Department of Global Public Health and Primary Care, University of Bergen, Bergen, Norway.
  7. Department of Medicine at the Peter Doherty Institute for Infection and Immunity, University of Melbourne, Melbourne, Australia.
  8. Zomba Central Hospital, Department of Obstetrics and Gynecology, Zomba, Malawi.

- 1
- 2
- 3 9. Malaria Alert Centre, Kamuzu University of Health Sciences (KUHeS), Chichiri, BT3, Blantyre,
- 4
- 5 Malawi.
- 6
- 7
- 8 10. Department of Health Promotion, Education, and Behaviour, Arnold School of Public Health,
- 9
- 10 University of South Carolina, Columbia, South Carolina, USA.
- 11
- 12 11. Diagnostic Haematology, The Royal Melbourne Hospital; and Clinical Haematology, The Peter
- 13
- 14 MacCallum Cancer Centre and The Royal Melbourne Hospital, Parkville VIC 3050 Australia.
- 15
- 16 12. Department of Medical Biology, Faculty of Medicine, Dentistry and Health Sciences, The
- 17
- 18 University of Melbourne, Melbourne, Australia.
- 19
- 20
- 21
- 22

23 **Protocol registry number:** ACTRN12618001268235

24

25

26

27

28 **Corresponding author:**

29

30 Martin N. Mwangi, P.O. Box 30538, Chichiri, BT3, Blantyre, Malawi. Email: [mmwangi@medcol.mw](mailto:mmwangi@medcol.mw)

31

32

33

34 Word count: 4,962 words. (Abstract) 299 words. (*excluding title page, abstract, references, figures*

35

36 *and tables*)

37

38

39

40

41

42

43

44

45

46

47

48

49

50

51

52

53

54

55

56

57

58

59

60

**ABSTRACT**

**Introduction:** Anaemia in pregnancy remains a critical global health problem, affecting 46% of pregnant women in Africa and 49% in Asia. Oral iron therapy requires extended adherence to achieve correction of anaemia and replenishment of iron stores. Ferric carboxymaltose (FCM) is a recently established intravenous iron formulation associated with substantial advantages in safety, speed of delivery and total dose deliverable in a single infusion. We aim to determine whether FCM given once during the second trimester of pregnancy compared to standard oral iron distributed through routine antenatal services is effective and safe for treatment of moderate to severe maternal anaemia in sub-Saharan Africa.

**Methods and analysis:** REVAMP is a two-arm confirmatory individually-randomised controlled trial set in Blantyre and Zomba districts in Malawi. The trial will randomise 862 women in the second trimester of pregnancy with a capillary haemoglobin concentration below 10.0g/dL. The study comprises two arms: (a) intravenous ferric carboxymaltose (20mg/kg up to 1000mg) given once at randomisation, and (b) standard of care oral iron (65mg elemental iron twice daily) for 90 days (or the duration of pregnancy, whichever is shorter) provided according to local health care practices. Both arms receive sulfadoxine-pyrimethamine (SP) as Intermittent Preventive Treatment in pregnancy (IPTp). The primary outcome is the prevalence of anaemia (Hb<11.0g/dL) at 36 weeks' gestation. Secondary outcomes include birth weight, gestation duration, and safety outcomes, including clinical malaria, serious perinatal events and postpartum haematologic and health-related outcomes in the mother and child.

**Ethics and dissemination:** Ethical approval was granted by the Research Ethics Committee (COMREC P.02/18/2357) in Malawi and the Human Research Ethics Committee (WEHI: 18/02), Melbourne, Australia. The protocol is registered with the Australian and New Zealand Clinical Trials Registry

1  
2  
3 ([ACTRN12618001268235](#)). The results will be shared with the local community that enabled the  
4  
5 research, and also to the international fora.

6  
7 **Keywords:** Anaemia, Iron Deficiency, Intravenous Iron, ferric carboxymaltose (FCM), Pregnancy,  
8  
9 Malawi, randomised controlled trial

#### 10 11 12 **Data Statement**

13  
14 All relevant data are within the paper and its supporting information files.

#### 15 16 17 18 19 **Protocol version**

20  
21 REVAMP Trial protocol version 5.0 dated 21 November 2020

#### 22 23 24 **Ethics approval**

25  
26 College of Medicine Research Ethics Committee (COMREC P.02/18/2357) in Malawi and the Walter  
27  
28 and Eliza Hall Institute of Medical Research Human Research Ethics Committee (WEHI: 18/02),  
29  
30 Melbourne, Australia.

#### 31 32 33 **Trial Sponsor**

34  
35 Director - Research Support Centre.

36  
37 College of Medicine, Kamuzu University of Health Sciences (KUHeS), Private Bag 360, Chichiri,  
38  
39 Blantyre 3, Malawi.

40  
41 Email: [rscdirector@medcol.mw](mailto:rscdirector@medcol.mw)

#### 42 43 44 45 46 **Roles and responsibilities of sponsor and funder:**

47  
48 The sponsor and funder had no role in study design. They will have no role nor ultimate authority in  
49  
50 the collection, management, analysis, and interpretation of data; writing of the report; and the  
51  
52 decision to submit the report for publication.  
53  
54  
55  
56  
57  
58  
59  
60



**ARTICLE SUMMARY****Strengths and limitations of this study****Strengths**

1. Eligibility for inclusion - moderate or severe anaemia - is assessed by capillary haemoglobin estimation, a method that could be deployed at the local health centre level.
2. The trial follows pregnant women and their babies through delivery and into the postpartum period enabling the assessment of antenatal and postnatal effects of the intervention.
3. This trial uses a modern intravenous iron formulation for the treatment of anaemia in pregnancy which enables a high dose iron infusion (up to 1000mg) to be infused in a single dose.
4. The trial will measure a broad range of hematologic, safety and clinical-efficacy outcomes.

**Limitations**

5. This trial is open-label, and participants will know the trial intervention to which they have been randomised.

view only

## INTRODUCTION

Anaemia during pregnancy remains a critical global health problem. Almost 40% of pregnant women worldwide are anaemic, including 46% of pregnant women in Africa and 49% in Asia.<sup>1</sup> Anaemia in pregnancy is very common and mostly results from iron deficiency and is associated with critical risks for both mother (e.g. life-threatening complications of postpartum haemorrhage) and child (especially prematurity and low birth weight,<sup>2</sup> which are associated with increased risk of neonatal and infant mortality,<sup>3</sup> and reduced iron stores in infancy with increased risk of subsequent anaemia and impaired development).<sup>4</sup> Severe anaemia in pregnancy is associated with a significantly increased risk of maternal mortality.<sup>5</sup> Worldwide, 15%-20% of births (>20 million annually, including 13% in sub-Saharan Africa) are low birthweight. At the same time, each year, over 1 million children die from preterm birth complications, making prevention and treatment of antenatal anaemia a crucial component of efforts to reduce low birth weight.

Systematic reviews confirm likely benefits from iron on maternal outcomes, including anaemia (70% reduction) and trends towards favourable infant outcomes, including increased birth weight and extended gestation duration.<sup>6</sup> A trial of oral iron compared with placebo in Kenyan pregnant women confirmed a benefit from iron on birth weight and gestation duration.<sup>7</sup> Global recommendations for managing anaemia in pregnancy in lower and middle income countries (LMICs) currently advise that women be treated with high-dose daily oral iron (120 mg of elemental iron) supplementation for three months.<sup>8-9</sup> However, oral iron is often poorly tolerated due to gastrointestinal adverse effects,<sup>10</sup> limiting adherence; lower doses with intermitted dosing have been used in non-pregnant women.<sup>11</sup> Delivery of iron during pregnancy requires high-quality performance of the primary health system. In Malawi, 10.6% of women were reported to take no iron during pregnancy, and 37.1% take less than 60 doses, with only 33.4% taking the recommended 90 or more doses.<sup>12</sup> Even when delivered, oral iron frequently fails to correct anaemia. For example, 61% of Gambian pregnant women who received iron at week 20 of gestation – when their Hb was lower than 10.0g/dL – still had a Hb<10.0g/dL at 30

1  
2  
3 weeks' gestation.<sup>13</sup> Finally, women may only present for their first antenatal visit late in the second  
4  
5 trimester, curtailing the time available to optimise iron stores with oral iron to improve foetal  
6  
7 development and risks associated with delivery; for example, in Malawi, fewer than 30% of pregnant  
8  
9 women attend before the sixteenth week of gestation.<sup>14</sup>  
10  
11  
12  
13

14  
15 Over the past decade, there have been dramatic improvements in parenteral (intravenous) iron  
16  
17 therapeutics. Ferric carboxymaltose (FCM) is a widely used formulation that can be administered in a  
18  
19 short period (15 min) and at large doses (up to 1000 mg) in a single infusion.<sup>15 16</sup> FCM has  
20  
21 revolutionised the treatment of iron-deficiency anaemia in high-income country settings and is widely  
22  
23 used in outpatient settings, emergency departments, and primary care.<sup>17</sup> In pregnancy, intravenous  
24  
25 iron has been reported to be superior to oral iron in improving haemoglobin concentrations and may  
26  
27 even increase birth weight.<sup>18</sup> Intravenous iron is increasingly recommended as a suitable first-line  
28  
29 option for women with moderate or severe iron-deficiency anaemia beyond the first trimester of  
30  
31 pregnancy.<sup>19</sup> Studies have evaluated the role of older forms of intravenous iron in pregnancy in low-  
32  
33 income settings such as India,<sup>20 21</sup> whilst other studies have demonstrated the feasibility of using FCM  
34  
35 in the post-partum period in sub-Saharan Africa<sup>22</sup> but modern formulations capable of delivering a  
36  
37 rapid total-dose infusion have not yet been studied in women in pregnancy in low income countries.  
38  
39  
40  
41  
42  
43

44 It remains challenging to directly measure iron status in the field, as biomarkers generally require  
45  
46 analysis using centralised laboratory infrastructure. In contrast, point-of-care measurement of  
47  
48 capillary haemoglobin is a feasible field-friendly testing strategy that can be deployed with existing  
49  
50 technology, of which HemoCue point-of-care devices are a good example. Screen-and-treat  
51  
52 approaches for anaemia in pregnancy must rely on haemoglobin measurement until point-of-care  
53  
54 assays for iron status become more widely available.  
55  
56  
57  
58  
59

60 FCM presents a practical opportunity for rapid correction of moderate and severe antenatal anaemia

1  
2  
3 in a single dose, potentially improving maternal and neonatal clinical outcomes for pregnant women.  
4  
5 It is, therefore, urgent to test this therapy in a low-income field setting where the burden of anaemia-  
6  
7 related disease is heaviest. In Malawian pregnant women with moderate or severe anaemia during  
8  
9 the second trimester of pregnancy, we aim to evaluate whether a single dose of intravenous ferric  
10  
11 carboxymaltose is superior to oral iron provided via standard-of-care approaches.  
12  
13  
14  
15  
16  
17

## 18 **METHODS AND ANALYSIS**

### 19 **Patient and Public Involvement**

20  
21  
22  
23  
24 We held discussions with national policy stakeholders during the study planning stage, including the  
25  
26 Ministry of Health. We discussed how the research might align with national research and health  
27  
28 service priorities. Local community engagement was done via public meetings; the potential  
29  
30 participants were first involved in the study's design during these meetings. We discussed the study  
31  
32 with the traditional leaders, including traditional authorities (TAs), group village headmen (GVH),  
33  
34 the village development committee (VDC), and ward councillors (political figures). The GVH were  
35  
36 requested to cascade the information to the village chiefs who took the information to the  
37  
38 community. Health workers were accessed via the District Health Offices in Blantyre and Zomba  
39  
40 districts. Health workers from the participating health facilities, including the health surveillance  
41  
42 assistants (HSAs) who directly work with the community, were informed about the proposed  
43  
44 research and discussions on priorities beneficial to the community were discussed. The public,  
45  
46 potential participants, and health workers identified malaria and anaemia as major public health  
47  
48 issues in the community. Women outlined their experiences with iron supplements during their past  
49  
50 pregnancies and identified the development of tolerable iron formulations as a research priority.  
51  
52  
53  
54  
55  
56  
57  
58  
59  
60  
61  
62  
63  
64  
65  
66  
67  
68  
69  
70  
71  
72  
73  
74  
75  
76  
77  
78  
79  
80  
81  
82  
83  
84  
85  
86  
87  
88  
89  
90  
91  
92  
93  
94  
95  
96  
97  
98  
99  
100  
101  
102  
103  
104  
105  
106  
107  
108  
109  
110  
111  
112  
113  
114  
115  
116  
117  
118  
119  
120  
121  
122  
123  
124  
125  
126  
127  
128  
129  
130  
131  
132  
133  
134  
135  
136  
137  
138  
139  
140  
141  
142  
143  
144  
145  
146  
147  
148  
149  
150  
151  
152  
153  
154  
155  
156  
157  
158  
159  
160  
161  
162  
163  
164  
165  
166  
167  
168  
169  
170  
171  
172  
173  
174  
175  
176  
177  
178  
179  
180  
181  
182  
183  
184  
185  
186  
187  
188  
189  
190  
191  
192  
193  
194  
195  
196  
197  
198  
199  
200  
201  
202  
203  
204  
205  
206  
207  
208  
209  
210  
211  
212  
213  
214  
215  
216  
217  
218  
219  
220  
221  
222  
223  
224  
225  
226  
227  
228  
229  
230  
231  
232  
233  
234  
235  
236  
237  
238  
239  
240  
241  
242  
243  
244  
245  
246  
247  
248  
249  
250  
251  
252  
253  
254  
255  
256  
257  
258  
259  
260  
261  
262  
263  
264  
265  
266  
267  
268  
269  
270  
271  
272  
273  
274  
275  
276  
277  
278  
279  
280  
281  
282  
283  
284  
285  
286  
287  
288  
289  
290  
291  
292  
293  
294  
295  
296  
297  
298  
299  
300  
301  
302  
303  
304  
305  
306  
307  
308  
309  
310  
311  
312  
313  
314  
315  
316  
317  
318  
319  
320  
321  
322  
323  
324  
325  
326  
327  
328  
329  
330  
331  
332  
333  
334  
335  
336  
337  
338  
339  
340  
341  
342  
343  
344  
345  
346  
347  
348  
349  
350  
351  
352  
353  
354  
355  
356  
357  
358  
359  
360  
361  
362  
363  
364  
365  
366  
367  
368  
369  
370  
371  
372  
373  
374  
375  
376  
377  
378  
379  
380  
381  
382  
383  
384  
385  
386  
387  
388  
389  
390  
391  
392  
393  
394  
395  
396  
397  
398  
399  
400  
401  
402  
403  
404  
405  
406  
407  
408  
409  
410  
411  
412  
413  
414  
415  
416  
417  
418  
419  
420  
421  
422  
423  
424  
425  
426  
427  
428  
429  
430  
431  
432  
433  
434  
435  
436  
437  
438  
439  
440  
441  
442  
443  
444  
445  
446  
447  
448  
449  
450  
451  
452  
453  
454  
455  
456  
457  
458  
459  
460  
461  
462  
463  
464  
465  
466  
467  
468  
469  
470  
471  
472  
473  
474  
475  
476  
477  
478  
479  
480  
481  
482  
483  
484  
485  
486  
487  
488  
489  
490  
491  
492  
493  
494  
495  
496  
497  
498  
499  
500  
501  
502  
503  
504  
505  
506  
507  
508  
509  
510  
511  
512  
513  
514  
515  
516  
517  
518  
519  
520  
521  
522  
523  
524  
525  
526  
527  
528  
529  
530  
531  
532  
533  
534  
535  
536  
537  
538  
539  
540  
541  
542  
543  
544  
545  
546  
547  
548  
549  
550  
551  
552  
553  
554  
555  
556  
557  
558  
559  
560  
561  
562  
563  
564  
565  
566  
567  
568  
569  
570  
571  
572  
573  
574  
575  
576  
577  
578  
579  
580  
581  
582  
583  
584  
585  
586  
587  
588  
589  
590  
591  
592  
593  
594  
595  
596  
597  
598  
599  
600  
601  
602  
603  
604  
605  
606  
607  
608  
609  
610  
611  
612  
613  
614  
615  
616  
617  
618  
619  
620  
621  
622  
623  
624  
625  
626  
627  
628  
629  
630  
631  
632  
633  
634  
635  
636  
637  
638  
639  
640  
641  
642  
643  
644  
645  
646  
647  
648  
649  
650  
651  
652  
653  
654  
655  
656  
657  
658  
659  
660  
661  
662  
663  
664  
665  
666  
667  
668  
669  
670  
671  
672  
673  
674  
675  
676  
677  
678  
679  
680  
681  
682  
683  
684  
685  
686  
687  
688  
689  
690  
691  
692  
693  
694  
695  
696  
697  
698  
699  
700  
701  
702  
703  
704  
705  
706  
707  
708  
709  
710  
711  
712  
713  
714  
715  
716  
717  
718  
719  
720  
721  
722  
723  
724  
725  
726  
727  
728  
729  
730  
731  
732  
733  
734  
735  
736  
737  
738  
739  
740  
741  
742  
743  
744  
745  
746  
747  
748  
749  
750  
751  
752  
753  
754  
755  
756  
757  
758  
759  
760  
761  
762  
763  
764  
765  
766  
767  
768  
769  
770  
771  
772  
773  
774  
775  
776  
777  
778  
779  
780  
781  
782  
783  
784  
785  
786  
787  
788  
789  
790  
791  
792  
793  
794  
795  
796  
797  
798  
799  
800  
801  
802  
803  
804  
805  
806  
807  
808  
809  
810  
811  
812  
813  
814  
815  
816  
817  
818  
819  
820  
821  
822  
823  
824  
825  
826  
827  
828  
829  
830  
831  
832  
833  
834  
835  
836  
837  
838  
839  
840  
841  
842  
843  
844  
845  
846  
847  
848  
849  
850  
851  
852  
853  
854  
855  
856  
857  
858  
859  
860  
861  
862  
863  
864  
865  
866  
867  
868  
869  
870  
871  
872  
873  
874  
875  
876  
877  
878  
879  
880  
881  
882  
883  
884  
885  
886  
887  
888  
889  
890  
891  
892  
893  
894  
895  
896  
897  
898  
899  
900  
901  
902  
903  
904  
905  
906  
907  
908  
909  
910  
911  
912  
913  
914  
915  
916  
917  
918  
919  
920  
921  
922  
923  
924  
925  
926  
927  
928  
929  
930  
931  
932  
933  
934  
935  
936  
937  
938  
939  
940  
941  
942  
943  
944  
945  
946  
947  
948  
949  
950  
951  
952  
953  
954  
955  
956  
957  
958  
959  
960  
961  
962  
963  
964  
965  
966  
967  
968  
969  
970  
971  
972  
973  
974  
975  
976  
977  
978  
979  
980  
981  
982  
983  
984  
985  
986  
987  
988  
989  
990  
991  
992  
993  
994  
995  
996  
997  
998  
999  
1000

## Trial objectives

The primary objective of the trial is to determine whether, in Malawian women in the second trimester of pregnancy with moderate or severe anaemia, a single dose of FCM up to 1000mg is superior to standard-of-care (i.e. oral iron provided through local health services), in reducing maternal anaemia before delivery (at 36 weeks' gestation).

The secondary objectives are:

During pregnancy and up to one month postpartum, to determine the effects of FCM (compared with standard-of-care) on:

Effectiveness:

- Maternal haemoglobin concentration and iron status (measured through iron biomarkers), and
- Critical neonatal outcomes including birth weight (low birth weight), gestation duration (prematurity), small for gestational age and other perinatal outcomes.

Safety:

- Maternal and neonatal adverse events, including infection episodes, serious maternal complications, and hypophosphatemia.

Exploratory objectives up to one month postpartum for subsequent hypothesis generation are related to maternal cognition, depression, and fatigue, as well as costs of health care.

## Study design

REVAMP is a multicentre, open-label, two-arm, parallel-group individually randomised controlled trial (RCT). An open-label (rather than blinded) design was selected as it was considered unfeasible to deliver the placebo intravenous infusions to Malawian pregnant women in this field-trial context (the

1  
2  
3 drug is dark-coloured). The trial recruited pregnant women in their second trimester and is following  
4 them until one month postpartum, after which we will report on the primary and secondary  
5 objectives. Extended follow-up of mothers and infants to 12-months postpartum is planned, as is a  
6 range of exploratory economic, biological and clinical outcomes. These analyses are beyond the scope  
7 of this protocol, as are the exploratory outcomes collected up to one month postpartum, and they will  
8 be reported separately. The trial design is summarised in **Figure 1**.  
9  
10  
11  
12  
13  
14  
15  
16  
17  
18

### 19 **Study settings and participants**

20  
21 In Malawi, the average gestation age at the first antenatal clinic (ANC) visit is 22 weeks, with 61%  
22 presenting before 24 weeks. The 2015-16 DHS survey estimated a prevalence of anaemia (Hb <  
23 11.0g/dL) in pregnant women in Malawi at 45.1%, including 22.4% of women with moderate or severe  
24 anaemia.<sup>12</sup> The prevalence of low birth weight in Malawi was around 14% in 2015.<sup>23</sup> Malawi is endemic  
25 for malaria and the prevalence of *Plasmodium spp.* parasitaemia at the first ANC visit in the study site  
26 exceeds 15%.<sup>24</sup> About 87% of women consume at least one dose of intermittent preventive treatment  
27 during pregnancy (IPTp), but this falls to 30% for women taking three or more doses.<sup>12</sup>  
28  
29  
30  
31  
32  
33  
34  
35  
36  
37  
38  
39

40 The REVAMP study has two major research sites namely Limbe Health Centre and Zomba Central  
41 Hospital located in Blantyre and Zomba districts respectively, in Southern Malawi. The two major sites  
42 act as the study coordination centres in the respective districts. The Blantyre site serves as the base  
43 for five urban health centres/antenatal clinics, whilst the Zomba site serves as the base for nine (four  
44 urban and five rural) health centres/antenatal clinics. Women are screened at the antenatal clinics  
45 and referred to the coordinating research site for enrolment, treatment and follow-up visits. Deliveries  
46 occur in government-operated birth suites attached to the study site with referral to a district hospital  
47 where required for obstetric indications.  
48  
49  
50  
51  
52  
53  
54  
55  
56  
57  
58  
59  
60

### Eligibility criteria

Women are only randomised if they fulfil all inclusion criteria and none of the exclusion criteria.

#### *Inclusion criteria:*

1. Confirmed singleton pregnancy at 13-26 weeks' gestation
2. Moderate to severe anaemia (capillary haemoglobin <10.0g/dL measured by HemoCue 301+) not clinically deemed to require an immediate blood transfusion. We excluded women with mild anaemia as thresholds to distinguish mild anaemia from health are indistinct, and because moderate and severe anaemia have an increased link to adverse maternal and child health outcomes.<sup>25</sup>
3. Negative malaria parasitaemia at screening and no positive malaria rapid diagnostic test within the previous seven days
4. Resident in the study catchment area of Blantyre and Zomba district
5. Plan to deliver at a health facility
6. Written informed consent, including assent if <18 years old (consent of a parent or guardian plus the participant's assent).

#### *Exclusion criteria:*

1. Hypersensitivity to any of the study drugs
2. Clinical symptoms of malaria or positive malaria rapid diagnostic test within the previous seven days, or symptoms of bacterial infection, at screening
3. Any condition requiring hospitalisation or serious concomitant illness
4. Chronic illness that may adversely affect foetal growth and viability
5. Severe anaemia clinically judged as requiring a blood transfusion (usually Hb <5.0g/dL)
6. Pre-eclampsia at screening (new onset of hypertension, proteinuria and swelling in the legs, feet, and hands).

## Trial Interventions

Participants are randomly assigned to receive one of the following interventions:

1. **Intravenous iron:** ferric carboxymaltose 20mg/kg up to 1000mg, diluted in normal saline and given over 15 minutes, once after randomisation. The study clinician administers the drug, and women remain under observation for 45 minutes after drug administration. Women receiving FCM are treated in rooms equipped with a trolley containing adrenaline, hydrocortisone, intravenous fluids and antihistamines, airway equipment and an oxygen concentrator. Staff are trained in the management of allergic reactions. Ferric carboxymaltose, manufactured by Vifor Pharma, was purchased at full-price from Aspen Pharma in Australia and shipped to Malawi.
2. **Standard-of-care - Oral iron treatment course:** oral iron- 200mg ferrous sulphate (approx. 65mg elemental iron) twice daily for 90 days or the remaining duration of pregnancy, whichever is shorter. Oral iron is provided by health workers using the same education messaging and similar packaging as provided by the routine health system to reflect real-life health service conditions.

Following national guidelines, both groups receive IPTp with 1500 mg Sulfadoxine and 75 mg Pyrimethamine (SP), as three tablets of SP of fixed dose (500mg/25mg) at least three times during pregnancy, at least four weeks apart. The IPTp-SP course at four weeks' post-randomisation is directly observed by study staff. HIV positive women in Malawi are not offered SP because they are already on Cotrimoxazole prophylaxis. The baseline dose is also directly administered by study staff if the participant did not receive it through the health service. All participants also receive an insecticide-treated bed net.

## Randomisation, allocation concealment, and blinding

Participants are randomly allocated to one of the two treatments arms with 1:1 allocation via a computer-generated randomisation schedule of randomly permuted blocks stratified by research site



1  
2  
3 (Blantyre, Zomba) to achieve a balance between the arms within each site. The randomisation list was  
4  
5 generated by an independent statistician at the University of Melbourne (Australia).  
6  
7  
8  
9

10 Individual participant codes were pre-packed in sealed envelopes by an independent researcher not  
11 associated with the study and held securely at the research sites. Eligible participants who meet all  
12 inclusion/exclusion criteria are sequentially allocated participant identification numbers within the  
13 research site, and their allocation to study group is revealed after opening the corresponding sealed  
14 envelope. Although the trial is open-label, laboratory scientists measuring haemoglobin  
15 concentration, midwives collecting birth outcome data, and investigators and researchers in Australia  
16 (including data managers and statisticians in Melbourne) are blinded to the treatment allocation  
17 during the conduct of the trial until the database is locked and ready for unblinding.  
18  
19  
20  
21  
22  
23  
24  
25  
26  
27  
28  
29  
30  
31

### 32 **Recruitment and Visits**

33  
34 **Table 1** shows the schedule of activities per visit for the mother, and **Table 2** shows the schedule of  
35 activities per visit for the neonate.  
36  
37  
38  
39  
40  
41  
42  
43  
44  
45  
46  
47  
48  
49  
50  
51  
52  
53  
54  
55  
56  
57  
58  
59  
60

**Table 1: Planned activities per visit for mothers**

|                          | Visit 0     | Visit 1 | Visit 2           | Visit 3 <sup>i</sup>            | Visit 4                         | Visit 5 –<br>6 <sup>j</sup>            | Visit 7             | Visit 8                         |
|--------------------------|-------------|---------|-------------------|---------------------------------|---------------------------------|----------------------------------------|---------------------|---------------------------------|
| <b>Protocol activity</b> | Day -7 to 0 | Day 0   | Day 28 ±2<br>days | 34 wks.<br>gestation<br>±2 days | 36 wks.<br>gestation<br>±2 days | 38-40<br>wks.<br>gestation<br>± 2 days | Delivery<br>+ 1 day | Day 28<br>postpartum<br>±2 days |

For peer review only

| <i>Location of visit</i>                       | <i>Antenatal<br/>Clinic</i> | <i>Research<br/>Site<sup>a</sup></i> | <i>Research<br/>Site<sup>a</sup></i> | <i>Home<sup>b</sup></i> | <i>Research<br/>Site<sup>a</sup></i> | <i>Home<sup>b</sup></i> | <i>Research<br/>Site<sup>a</sup></i> | <i>Research Site<sup>a</sup></i> |
|------------------------------------------------|-----------------------------|--------------------------------------|--------------------------------------|-------------------------|--------------------------------------|-------------------------|--------------------------------------|----------------------------------|
| Informed consent process for pre-screening     | X                           |                                      |                                      |                         |                                      |                         |                                      |                                  |
| Pre-screening                                  | X                           |                                      |                                      |                         |                                      |                         |                                      |                                  |
| Detailed Informed consent process              | X                           | X                                    |                                      |                         |                                      |                         |                                      |                                  |
| Screening                                      |                             | X                                    |                                      |                         |                                      |                         |                                      |                                  |
| Medical & obstetric history                    |                             | X                                    |                                      |                         |                                      |                         |                                      |                                  |
| Demographics                                   |                             | X                                    |                                      |                         |                                      |                         |                                      |                                  |
| Maternal physical examination <sup>d</sup>     |                             | X <sup>h</sup>                       | X <sup>i</sup>                       |                         | X <sup>i</sup>                       |                         | X <sup>h</sup>                       | X <sup>i</sup>                   |
| Ultrasound scan (Fetal Biometry) <sup>d</sup>  |                             | X                                    | X                                    |                         | X                                    |                         |                                      |                                  |
| Randomise participant                          |                             | X                                    |                                      |                         |                                      |                         |                                      |                                  |
| Administer treatment                           |                             | X                                    |                                      |                         |                                      |                         |                                      |                                  |
| Intermittent preventive treatment <sup>c</sup> |                             | X                                    | X                                    |                         | X                                    |                         |                                      |                                  |
| <b>Laboratory procedures</b>                   |                             |                                      |                                      |                         |                                      |                         |                                      |                                  |
| Capillary haemoglobin <sup>d</sup>             | X                           | X                                    | X                                    | X                       | X                                    | X                       | X                                    | X                                |
| Full blood count <sup>d</sup>                  |                             | X                                    | X                                    |                         | X                                    |                         | X                                    | X                                |
| Malaria diagnostics <sup>d,e</sup>             | X                           | X                                    | X                                    |                         | X                                    |                         | X                                    | X                                |
| Serum for iron markers tests <sup>f</sup>      |                             | X                                    | X                                    |                         | X                                    |                         | X                                    | X                                |

|                                                   |  |   |   |   |   |   |   |   |
|---------------------------------------------------|--|---|---|---|---|---|---|---|
| Serum for inflammatory markers tests <sup>g</sup> |  | X | X |   | X |   | X | X |
| Phosphate                                         |  | X | X |   | X |   | X | X |
| Adverse events <sup>d</sup>                       |  | X | X |   | X |   | X | X |
| Morbidities                                       |  |   |   |   |   |   |   | X |
| Missed visits <sup>d</sup>                        |  |   | X | X | X | X | X | X |
| End of study                                      |  |   | X | X | X | X | X | X |

<sup>a</sup> Visit conducted at the research site/health facility; <sup>b</sup> Visit conducted at the participant's home; <sup>c</sup> Assessing if intermittent preventive treatments sulphadoxine pyrimethamine and albendazole were given; <sup>d</sup> Protocol activities are also collected at any unscheduled visits; <sup>e</sup> Malaria diagnostics include malaria rapid diagnostic test, malaria microscopy; <sup>f</sup> Serum for iron markers tests include serum ferritin; <sup>g</sup> Serum for inflammatory markers tests include C-reactive protein and alpha-1 glycoprotein; <sup>h</sup> Complete maternal physical examination includes general appearance, throat, neck, thyroid, musculoskeletal, skin, lymph nodes, extremities, pulses, pulmonary, cardiac, abdominal, and neurological examination; <sup>i</sup> Limited maternal physical examination includes general appearance, brief pulmonary, cardiac, abdominal and neurological examination. <sup>j</sup> Since the opening of the trial, visits 3, 5 and 6 have been suspended since April 2020 due to the risk of exposing communities to COVID-19 during home visits.

**Table 2: Details of planned activities per visit for neonates**

| Protocol activity                                      | Visit 7                          | Visit 8                          |
|--------------------------------------------------------|----------------------------------|----------------------------------|
|                                                        | Delivery +1 day                  | Day 28 Postpartum ±2 days        |
| <i>Location of visit</i>                               | <i>Research Site<sup>a</sup></i> | <i>Research Site<sup>a</sup></i> |
| Pregnancy outcome                                      | X                                |                                  |
| Physical examination and anthropometry <sup>b, c</sup> | X <sup>f</sup>                   | X <sup>g</sup>                   |
| <b>Laboratory procedures</b>                           |                                  |                                  |
| Capillary haemoglobin                                  | X <sup>h</sup>                   |                                  |
| Full blood count <sup>b</sup>                          | X <sup>h</sup>                   | X                                |
| Malaria diagnostics <sup>d</sup>                       | X <sup>h</sup>                   | X                                |
| Serum for iron markers tests <sup>e</sup>              | X <sup>h</sup>                   | X                                |
| Vaccination and Vit A supplementation status           |                                  | X                                |
| Adverse events <sup>b</sup>                            | X                                | X                                |
| Morbidities                                            |                                  | X                                |
| Missed visits <sup>b</sup>                             |                                  | X                                |
| End of study                                           | X                                | X                                |

<sup>a</sup> Visit done at the research site/ health facility; <sup>b</sup> Protocol activities are also collected at any unscheduled visits; <sup>c</sup> Anthropometry includes assess the infant's weight, length, and head circumference; <sup>d</sup> Malaria diagnostics include malaria rapid diagnostic test, malaria microscopy, malaria filter paper for polymerase chain reaction and histology at delivery; <sup>e</sup> Serum for iron markers tests include serum ferritin; <sup>f</sup> The complete physical examination includes general appearance, throat, neck, thyroid, musculoskeletal, skin, lymph nodes, extremities, pulses, pulmonary, cardiac, abdominal, and neurological examination <sup>g</sup> The limited examination includes general appearance, brief pulmonary, cardiac, abdominal and neurological examination; <sup>h</sup> These assessments are collected via cord blood.

## Screening and enrolment of participants

Study recruitment opened on November 12, 2018; the final participant was recruited on March 02, 2021. Study activities are detailed in Tables 1 and 2.

### *Pre-screening and screening, visit 0 (day -7 to 0)*

Women attending their first antenatal visit at ANCs are given general information (aims and procedures) about the study by a trained research nurse and invited to consent to pre-screening procedures. As the ANC nurse cares for attendees, the research nurse pre-screens potential participants by noting apparent gestation age based on clinical examination and last menstrual period and then tests for anaemia with capillary Hb (HemoCue 301+, Angelholm Sweden) and *Plasmodium* parasitaemia by rapid diagnostic test (SD Bioline Malaria AG P.F/PAN, Standard Diagnostics, Inc.). Potentially eligible participants receive further information about the study. Willing participants are referred to the research site for additional evaluation, full consenting procedure and recruitment.

### *Enrolment, visit 1 (day 0)*

As presented in Table 1, at the health facility, potentially eligible participants undergo ultrasound scanning (within two days from the initial pre-screening visit) to confirm singleton pregnancy and determine gestation age (i.e. crown-rump length for less than or equal to 16 weeks, femur length and head and abdominal circumference for more than 16 weeks). Written informed consent is then obtained for participation in the trial. For consenting participants, a physical examination is conducted, and baseline data are collected, comprising demographic information and medical and obstetric history. Following the collection of baseline clinical data, samples of both capillary and venous blood are collected and then participants are randomised. For women randomised to the ferric carboxymaltose arm of the trial, an intravenous cannula is inserted under aseptic precautions, and a trained nurse administers the study drug according to standard procedures and under the supervision of the study clinician. Women randomised to the standard-of-care arm of the trial are provided with

1  
2  
3 a full course of iron tablets, together with information delivered according to a standardised script  
4  
5 reflecting ANC practice.  
6  
7

### 8 **Subsequent study visits**

9  
10  
11 *Visit 2 (28 ( $\pm$ 2) days after enrolment into the study):* Participants receive a physical examination and  
12  
13 an ultrasound scan before being asked for a venous blood sample (Table 1). A capillary sample is  
14  
15 collected for assessment of *Plasmodium* parasitaemia. The participants are asked to continue their  
16  
17 regular ongoing ANC visits through their local health centre.  
18  
19

20  
21 *Visit 3; visits 5-6 (34 weeks' gestation  $\pm$ 2 days; 38-40 weeks' gestation  $\pm$ 2 days):* Participants are visited  
22  
23 in their home at 34 weeks' gestation, and every two weeks from 38 weeks' gestation until delivery. A  
24  
25 research nurse measures capillary Hb. Where the participant belongs to the standard-of-care trial-  
26  
27 arm, the research nurse attempts to assess adherence. Notably, since the opening of the trial,  
28  
29 fieldwork has been affected by the COVID-19 pandemic. Because of the risks of study workers  
30  
31 introducing COVID-19 into remote villages, home visits were removed from the trial protocol after  
32  
33 April 2020.  
34  
35

36  
37  
38 *Visit 4 (36 weeks' gestation/pre-delivery  $\pm$ 2 days):* Procedures are similar to those for Visit 2 (28-days  
39  
40 post-treatment). This visit includes the assessment of venous haemoglobin for the primary outcome.  
41  
42

43 *Visit 7 (Delivery +1 day):* The study provides 24-hour cover of the study research sites' delivery suites.  
44  
45 All participants are asked to return to the research site for delivery (unless a high-risk pregnancy  
46  
47 requires delivery at the tertiary referral hospital). Standardised delayed cord clamping procedures are  
48  
49 instituted. Participants delivering at home or at other health facilities are encouraged to attend the  
50  
51 research site for assessment within 24 hours. Venous blood samples are collected during labour. Apgar  
52  
53 scores are recorded immediately after delivery, and the newborn undergoes a full physical  
54  
55 examination, including measurement of birth weight, length, head circumference, and assessment for  
56  
57 congenital malformations. The type of birth and occurrence of perinatal complications (including  
58  
59  
60

1  
2  
3 haemorrhage or need for blood transfusion) are recorded. Placental blood is drawn, and a sample of  
4  
5 placental tissue is collected and stored in buffered formalin for subsequent histological evaluation.  
6  
7

8 *Visit 8 (28 days postpartum  $\pm$ 2 days):* Participants return to the research site together with their  
9  
10 infants for a detailed medical examination of both mother and infant and collection of blood samples.  
11  
12

13 *Unscheduled visit:* Participants are asked to attend the research site when symptomatically unwell.  
14  
15 They are managed according to national standard treatment guidelines by a trained health care  
16  
17 provider. Blood samples for malaria RDT (and microscopy if RDT positive) and blood culture are taken  
18  
19 if clinically indicated. The clinical diagnosis of the unscheduled visit is recorded in the participant's  
20  
21 record. Where a participant attends another health facility or antenatal clinic, the research team  
22  
23 extracts the missed unscheduled visit notes from the participants health book commonly known as a  
24  
25 health "passport" in Malawi. Usually, clinical investigations and medications are indicated in the  
26  
27 health book and can be extracted by the research team during the next scheduled visit.  
28  
29  
30

### 31 32 **Laboratory Procedures**

33  
34 Venous blood is measured for haemoglobin concentration using an automated analyser (Sysmex, XP  
35  
36 300 series, Sysmex Corporation, Kobe, Japan), for which daily two level controls are run and  
37  
38 recorded. Serum is separated by centrifugation and stored at -80 degrees Celsius. Samples will be  
39  
40 batched and assayed for ferritin, C-reactive protein, and phosphate in Meander Medical Centre  
41  
42 laboratory, accreditation number M040, EN ISO 15189:2012 (Amersfoort, The Netherlands).  
43  
44  
45  
46  
47

### 48 **Data Monitoring Committee (DMC)**

49  
50 An independent DMC has been set up to review on a regular basis, safety and efficacy data of the  
51  
52 ongoing trial. The DMC is comprised of international experts in clinical trials, obstetrics,  
53  
54 epidemiology and statistics. In the advent of clear evidence of effectiveness or harm, the DMC will  
55  
56 recommend to the sponsor and investigators whether to continue, modify, or terminate the trial on  
57  
58 ethical grounds.  
59  
60



## Outcomes

The primary outcome is the prevalence of maternal anaemia before delivery, defined as a venous haemoglobin concentration less than 11.0g/dL at 36 weeks' gestation. This outcome evaluates the performance of the study intervention in helping women reach labour with optimal tissue oxygenation and resilience.

Secondary outcomes assessing effectiveness in the mother are anaemia at four weeks' post-randomisation and one month postpartum, moderate/severe anaemia, haemoglobin concentration, iron deficiency (ferritin<15mg/L adjusted for C-reactive protein), iron deficiency anaemia, and serum ferritin concentration all at four weeks post-randomisation, 36 weeks' gestation, and one month postpartum.

Effectiveness in the neonate is assessed using the outcome of mean birthweight (measured in grams within 24 hours of birth) and the secondary outcomes low birth weight (birth weight less than 2500g), gestation duration (weeks), birth length, small for gestation age, fetal loss (pregnancy loss before 28 completed weeks' gestation), stillbirth (birth of a child showing no signs of life after 28 weeks' gestation), preterm births (neonate born before 37 completed weeks of gestation), haemoglobin concentration at 1-month postpartum and infant growth (weight for age, length for age, weight for length) at one month postpartum.

Outcomes assessing safety in the mother are (serious) adverse events related to administration of FCM (events occurring during the enrolment visit), (serious) adverse events (within 14 days of randomisation, antenatal and postpartum reported separately), all-cause sick visits to the clinic (antenatal and postpartum reported separately), clinical malaria-specific visits to the clinic (antenatal and postpartum reported separately), *P. falciparum* parasitaemia (at four weeks' post-randomisation and 36 weeks' gestation), hypophosphatemia (biochemical) (at four weeks' post-randomisation and 36 weeks' gestation), inflammation (elevated C-reactive protein) (at four weeks'

1  
2  
3 post-randomisation and 36 weeks' gestation), and severe medical events including haemorrhage,  
4 receipt of blood transfusion, ICU admission, or mortality.  
5  
6  
7

8 Clinical infections will be reported during unplanned visits. Clinical malaria will be defined clinically,  
9 in women who present with fever and a positive malaria test. Diarrhoea will be defined in women  
10 with more than three loose stools per day. Other clinical diagnoses will be made according to local  
11 health manuals.  
12  
13  
14  
15  
16

17  
18 Safety in the infant is assessed using (serious) adverse events, all-cause visits to the clinic, infection-  
19 related visits to the clinic, diarrhoea-related visits to the clinic, and clinical malaria-specific visits to  
20 the clinic.  
21  
22  
23  
24  
25

26 In addition to the primary and secondary clinical outcomes listed above, which will support the  
27 reporting of the confirmatory RCT, data for many exploratory outcomes are being collected between  
28 enrolment and 12-months postpartum. These include assessing maternal cognition, mother-infant  
29 bonding, maternal depression and fatigue, infant neurodevelopment, infant diet and health economic  
30 data, including direct and indirect costs of health care. Also, women have given their consent for the  
31 collection of samples for future translational studies, including evaluation of the vaginal and faecal  
32 microbiome, maternal immune profiles, and effects of interventions directed towards *P. falciparum*  
33 biology. Details of primary, secondary and exploratory outcomes included in the trial registration are  
34 shown in Supplementary Table 1.  
35  
36  
37  
38  
39  
40  
41  
42  
43  
44  
45  
46  
47  
48  
49

#### 50 **Detection and reporting of Adverse Events and Serious Adverse Events**

51  
52 Non-serious Adverse Events (AEs) and serious adverse events (SAEs) are collected from the time  
53 consent is given until the participant completes the study (the final visit or withdrawal). These are  
54 detected either through spontaneous reports by the participant, unplanned visits to the research site  
55 or any of the participating health centres, observation by the study staff, and through standard  
56  
57  
58  
59  
60

1  
2  
3 questioning at each visit. All SAEs are reported to the sponsor and the appropriate ethics committee,  
4  
5 whether or not considered causally related to the study drugs.  
6  
7  
8  
9

## 10 11 **Sample size**

12  
13  
14 The sample size calculation is based on the primary maternal outcome of the proportion of women  
15 with pre-delivery anaemia (defined as venous Hb<11.0g/dL at 36 weeks' gestation). A systematic  
16 review and meta-analysis identified a 50% reduction in anaemia prevalence in women receiving oral  
17 iron.<sup>2</sup> In a cohort of pregnant women in the Gambia, we observed that 60% of pregnant women with  
18 Hb<10.0g/dL at 20 weeks' gestation who then receive iron interventions continue to have  
19 Hb<10.0g/dL by 30 weeks.<sup>13</sup> The pivotal Fer-ASAP trial (which compared FCM to oral iron in women  
20 with iron deficiency anaemia in high-income settings) demonstrated a 14% reduction in absolute  
21 anaemia prevalence compared with oral iron.<sup>26</sup> We hypothesise that routine iron supplementation  
22 will reduce anaemia prevalence from 100% to 60% (as seen in the Gambia,<sup>13</sup> and similar to data from  
23 Haider and colleagues<sup>2</sup>). We hypothesise that ferric carboxymaltose will result in a 10% absolute  
24 improvement in anaemia cure (to a prevalence of 50%). A total sample size of 862 pregnant women  
25 or 431 per group will provide 80% power to detect this difference, allowing for a 10% loss to follow-  
26 up and assuming a two-sided alpha of 5%. The sample size also has at least 80% power to detect an  
27 absolute difference between standard-of-care oral iron and ferric carboxymaltose of 100g in the  
28 neonatal outcome of birth weight (assuming a standard deviation of 450g and a two-sided alpha of  
29 5%), similar to the effect size seen in a trial of Kenyan women receiving oral iron when compared to  
30 placebo.<sup>7</sup>  
31  
32  
33  
34  
35  
36  
37  
38  
39  
40  
41  
42  
43  
44  
45  
46  
47  
48  
49  
50  
51

## 52 53 54 55 **STATISTICAL ANALYSIS PLAN**

56  
57  
58 A detailed statistical analysis plan will be finalised before unblinding of the database. Analyses will be  
59 performed where participants are classified according to their randomised intervention arm (i.e.  
60

1  
2  
3 intention to treat principle). An available case analysis will be performed for repeated time point  
4  
5 outcomes (e.g. anaemia) and a complete-case analysis for single time point outcomes (e.g. birth  
6  
7 weight). Anaemia will be analysed using a log-binomial regression model, including study participants  
8  
9 as a random intercept to account for the multiple time points. The model will include the standard-  
10  
11 of-care (oral iron) group as the reference group. The primary maternal hypothesis will be evaluated  
12  
13 by obtaining the estimate of the prevalence ratio of IV iron versus standard-of-care (oral iron), 95%  
14  
15 confidence interval extracted at 36 weeks' gestation, and p-value. Birthweight will be analysed by  
16  
17 fitting a linear regression model. The primary neonatal hypothesis will be evaluated by estimating the  
18  
19 absolute difference in mean birth weight between IV iron and standard-of-care (oral iron) along with  
20  
21 a corresponding 95% confidence interval and p-value. Secondary repeated time point binary  
22  
23 outcomes will be analysed similarly to anaemia, and secondary single time point continuous outcomes  
24  
25 will be analysed similarly to birthweight. Secondary, single time point binary outcomes (e.g., sub-  
26  
27 optimal pregnancy outcomes) will be analysed using a log-binomial regression model and secondary,  
28  
29 multiple time point continuous outcomes (e.g., maternal haemoglobin concentration) will be analysed  
30  
31 using a likelihood-based longitudinal data analysis model.<sup>27</sup> Appropriate transformations may be  
32  
33 applied to the variables before fitting the model if considered skewed (e.g. ferritin). Additional  
34  
35 analyses using multiple imputation will be performed to handle missing data. Results will be compared  
36  
37 with the main analysis to investigate the findings' robustness to the missing data assumptions. Safety,  
38  
39 including adverse events, infections and clinic visits, will be presented for the mothers and neonates,  
40  
41 respectively. The proportion of study participants with at least one safety outcome will be compared  
42  
43 between groups using a log-binomial regression model. A Poisson model with robust standard errors  
44  
45 will be fitted if there is a non-convergence of the log-binomial model for efficacy or safety outcomes.  
46  
47 Exploratory subgroup analyses (e.g., by parity, site, iron deficiency) will be performed for maternal  
48  
49 and neonatal outcomes, irrespective of their findings. The analyses models for all study outcomes will  
50  
51 adjust for the randomisation stratification variable of the site as a main effect.  
52  
53  
54  
55  
56  
57  
58  
59  
60

## Data Management

Data collected from the subjects are recorded in digital Case Report Forms (CRFs) using tablets. Relevant hard copy patient hospital files are scanned for reference and stored digitally, securely. An independent Data and Safety Monitoring Board has been established to regularly review the trial's progress and blinded and unblinded results. The Research Support Centre at the College of Medicine performs independent monitoring of the study on behalf of the sponsor. No interim analysis is planned.

## ETHICS AND DISSEMINATION

The College of Medicine Research Ethics Committee (COMREC), Blantyre, Malawi, and the Walter and Eliza Hall Institute of Medical Research Human Research Ethics Committee, Melbourne, Australia, approved this study. In addition, an evaluation was done by the Regional Ethics Committee West of Norway. They advised that the study was not subject to the Norwegian Health Research Act and that ethical review from this committee was not required. The trial is approved by the Malawian Pharmacy and Medicines Regulatory Authority (PMRA/CTRC/III/25052018100). Important protocol modifications such as changes to eligibility criteria or outcomes are reported to the ethics committees, regulatory authorities in Malawi, investigators, trial participants, trial registries. Witnessed informed written consent in English or Chichewa language is obtained from each participant before conducting any study-related procedure. The study is conducted under The International Conference on Harmonisation of Technical Requirements for Registration of Pharmaceuticals for Human Use (ICH) guidelines for "good clinical practice" (GCP) and the Declaration of Helsinki. The results will be presented to and shared with the local community that hosted and enabled the research, and also to

1  
2  
3 the international fora. We will publish in peer-reviewed scientific journals and report to relevant  
4  
5 policymaking bodies such as the Malawi Ministry of Health.  
6  
7  
8  
9  
10

## 11 **DISCUSSION**

12  
13  
14 Maternal anaemia prevalence is highest in sub-Saharan Africa and South Asia, and current approaches  
15  
16 to control it are failing. This trial will provide high quality, African-based evidence for clinicians,  
17  
18 policymakers and donors on a role for modern IV iron for antenatal anaemia in low-income settings.  
19  
20 This is the largest RCT program assessing new IV iron formulations in pregnancy and is of major  
21  
22 international significance in developing new global guidelines for anaemia in pregnancy. The results  
23  
24 of this study will be disseminated to local and national medical authorities, policymakers, and be  
25  
26 disseminated to the global research community, technical agencies, and international government  
27  
28 bodies via peer-reviewed journals and at international scientific fora.  
29  
30  
31  
32  
33  
34

### 35 **Author Contributions:**

36  
37 KSP, and S-RP were involved in conception and trial design. MNM wrote the first draft of the paper.  
38  
39 MNM, GM, EM, SB, RH and RA were involved in drafting of the article. SB and RH provided statistical  
40  
41 expertise. MNM, GM, EM, and KB were involved in study implementation and data acquisition. BR,  
42  
43 JS, WS, SR, JC and LL were involved in critical revision of the article for important intellectual  
44  
45 content. All the authors were involved in final approval of the article. Preparing study design,  
46  
47 collection, management, analysis and interpretation of data; writing of the report; and the decision  
48  
49 to submit the report for publication is the responsibility of the study sponsor. The study funder, the  
50  
51 Bill and Melinda Gates Foundation, had no role in the decision to publish.  
52  
53  
54  
55  
56  
57

58 **Funding statement:** This study is funded by the Bill & Melinda Gates Foundation OPP1169939.  
59  
60

**Acknowledgements:**

We acknowledge all the study participants for their willingness to participate in this study. We appreciate the dedication of the research staff in Blantyre, Zomba and Melbourne. We are grateful for the support we continue to receive from the District Health Offices in Blantyre and Zomba districts of Malawi. We acknowledge the collaboration with the Zomba Central Hospital, especially the office of the Hospital Director. We thank Dr Alinune Kabaghe and Dr Josephine Banda, who independently packed the trial drugs and delivered them to research sites. We also acknowledge the Dr Kamiza Histopathology Laboratory for analysing the placental samples.

**Competing interests statement.**

None to declare.

**Word Count:** 4,962

## References

1. World Health Organization. The global prevalence of anaemia in 2011. . In: World Health Organization, ed. Geneva, 2015.
2. Haider BA, Olofin I, Wang M, et al. Anaemia, prenatal iron use, and risk of adverse pregnancy outcomes: Systematic review and meta-analysis. *BMJ (Online)* 2013;347(7916) doi: 10.1136/bmj.f3443
3. Premru-Srsen T, Verdenik I, Ponikvar BM, et al. Infant mortality and causes of death by birth weight for gestational age in non-malformed singleton infants: a 2002-2012 population-based study. *J Perinat Med* 2018;46(5):547-53. doi: 10.1515/jpm-2017-0103 [published Online First: 2017/06/11]
4. World Health Organization, United Nations Children's Fund, United Nations University. Iron Deficiency Anaemia: Assessment, Prevention, and Control. A guide for programme managers. In: Organization. WH, ed. Geneva, 2001.
5. Daru J, Zamora J, Fernández-Félix BM, et al. Risk of maternal mortality in women with severe anaemia during pregnancy and post partum: a multilevel analysis. *Lancet Glob Health* 2018;6(5):e548-e54. doi: 10.1016/s2214-109x(18)30078-0 [published Online First: 2018/03/25]
6. Peña-Rosas JP, De-Regil LM, Garcia-Casal MN, et al. Daily oral iron supplementation during pregnancy. *Cochrane Database of Systematic Reviews* 2015;2015(7):1-527. doi: 10.1002/14651858.CD004736.pub5
7. Mwangi MN, Roth JM, Smit MR, et al. Effect of daily antenatal iron supplementation on plasmodium infection in kenyan women: A randomized clinical trial. *JAMA - Journal of the American Medical Association* 2015;314(10):1009-20. doi: 10.1001/jama.2015.9496
8. World Health Organization. Iron and folate supplementation. Integrated management of pregnancy and childbirth (IMPAC). . In: Organization WH, ed. Geneva, 2006.
9. World Health Organization. Essential Nutrition Actions: Improving maternal, newborn, infant and young child health and nutrition. . In: Organization. WH, ed. Geneva, 2013.
10. Low MSY, Speedy J, Styles CE, et al. Daily iron supplementation for improving anaemia, iron status and health in menstruating women. *Cochrane Database of Systematic Reviews* 2016;2016(4) doi: 10.1002/14651858.CD009747.pub2
11. Stoffel NU, Cercamondi CI, Brittenham G, et al. Iron absorption from oral iron supplements given on consecutive versus alternate days and as single morning doses versus twice-daily split dosing in iron-depleted women: two open-label, randomised controlled trials. *Lancet Haematol* 2017;4(11):e524-e33. doi: 10.1016/s2352-3026(17)30182-5 [published Online First: 2017/10/17]
12. National Statistical Office (NSO) [Malawi], ICF International. Malawi Demographic and Health Survey 2015-16: Key Indicators Report. In: NSO and ICF International, ed. Zomba, Malawi, and Rockville, Maryland, USA, 2016.
13. Bah A, Pasricha SR, Jallow MW, et al. Serum hepcidin concentrations decline during pregnancy and may identify iron deficiency: Analysis of a longitudinal pregnancy cohort in the Gambia. *Journal of Nutrition* 2017;147(6):1131-37. doi: 10.3945/jn.116.245373



14. Mkandawire P. Gestational Age at First Antenatal Care Visit in Malawi. *Matern Child Health J* 2015;19(11):2366-74. doi: 10.1007/s10995-015-1754-6 [published Online First: 2015/07/15]
15. Friedrisch JR, Cañado RD. Intravenous ferric carboxymaltose for the treatment of iron deficiency anemia. *Revista Brasileira de Hematologia e Hemoterapia* 2015;37(6):400-05. doi: 10.1016/j.bjhh.2015.08.012
16. Pasricha SR, Tye-Din J, Muckenthaler MU, et al. Iron deficiency. *Lancet* 2021;397(10270):233-48. doi: 10.1016/s0140-6736(20)32594-0 [published Online First: 2020/12/08]
17. Shand AW, Bell J, Henry A, et al. Rapid increase in intravenous iron therapy for women of reproductive age in Australia. *Med J Aust* 2020;213(2):85-86. doi: 10.5694/mja2.50618 [published Online First: 2020/05/27]
18. Qassim A, Grivell RM, Henry A, et al. Intravenous or oral iron for treating iron deficiency anaemia during pregnancy: systematic review and meta-analysis. *Med J Aust* 2019;211(8):367-73. doi: 10.5694/mja2.50308 [published Online First: 2019/08/24]
19. Achebe MM, Gafter-Gvili A. How I treat anemia in pregnancy: Iron, cobalamin, and folate. *Blood* 2017;129(8):940-49. doi: 10.1182/blood-2016-08-672246
20. Neogi SB, Devasenapathy N, Singh R, et al. Safety and effectiveness of intravenous iron sucrose versus standard oral iron therapy in pregnant women with moderate-to-severe anaemia in India: a multicentre, open-label, phase 3, randomised, controlled trial. *Lancet Glob Health* 2019;7(12):e1706-e16. doi: 10.1016/s2214-109x(19)30427-9 [published Online First: 2019/11/12]
21. Ortiz R, Toblli JE, Romero JD, et al. Efficacy and safety of oral iron(III) polymaltose complex versus ferrous sulfate in pregnant women with iron-deficiency anemia: a multicenter, randomized, controlled study. *J Matern Fetal Neonatal Med* 2011;24(11):1347-52. doi: 10.3109/14767058.2011.599080 [published Online First: 2011/08/24]
22. Vanobberghen F, Lweno O, Kuemmerle A, et al. Efficacy and safety of intravenous ferric carboxymaltose compared with oral iron for the treatment of iron deficiency anaemia in women after childbirth in Tanzania: a parallel-group, open-label, randomised controlled phase 3 trial. *Lancet Glob Health* 2021;9(2):e189-e98. doi: 10.1016/s2214-109x(20)30448-4 [published Online First: 2020/11/28]
23. World Bank. Prevalence of low birthweight babies (% of births) - Malawi Washington DC, USA2021 [21 August 2021]. Available from: <https://data.worldbank.org/indicator/SH.STA.BRTW.ZS?locations=MW>.
24. Boudová S, Divala T, Mawindo P, et al. The prevalence of malaria at first antenatal visit in Blantyre, Malawi declined following a universal bed net campaign. *Malar J* 2015;14:422. doi: 10.1186/s12936-015-0945-3 [published Online First: 2015/10/30]
25. Young MF, Oaks BM, Tandon S, et al. Maternal hemoglobin concentrations across pregnancy and maternal and child health: a systematic review and meta-analysis. *Ann N Y Acad Sci* 2019;1450(1):47-68. doi: 10.1111/nyas.14093 [published Online First: 2019/04/18]
26. Breyman C, Milman N, Mezzacasa A, et al. Ferric carboxymaltose vs. oral iron in the treatment of pregnant women with iron deficiency anemia: An international, open-label, randomized controlled trial (FER-ASAP). *Journal of Perinatal Medicine* 2017;45(4):443-53. doi: 10.1515/jpm-2016-0050

- 1  
2  
3 27. Liang K-Y, Zeger SL. Longitudinal data analysis of continuous and discrete responses for  
4 pre-post designs *Sankhyā: The Indian Journal of Statistics* 2000;Series B:134-48. doi:  
5 doi: <https://www.jstor.org/stable/25053123>  
6  
7  
8  
9  
10  
11  
12  
13  
14  
15  
16  
17  
18  
19  
20  
21  
22  
23  
24  
25  
26  
27  
28  
29  
30  
31  
32  
33  
34  
35  
36  
37  
38  
39  
40  
41  
42  
43  
44  
45  
46  
47  
48  
49  
50  
51  
52  
53  
54  
55  
56  
57  
58  
59  
60

For peer review only

1  
2  
3 **Figure heading, caption and legend**  
4

5  
6 **Figure 1**  
7

8 **Figure caption and legend:** REVAMP Trial schema. V0 – visit 0; V1 – Visit 1; V2 – Visit 2; V4 – Visit 4; V7 – Visit 7;  
9  
10 V8 – Visit 8; Abbreviations: iv – Intravenous; wks – weeks.  
11  
12  
13  
14  
15  
16  
17  
18  
19  
20  
21  
22  
23  
24  
25  
26  
27  
28  
29  
30  
31  
32  
33  
34  
35  
36  
37  
38  
39  
40  
41  
42  
43  
44  
45  
46  
47  
48  
49  
50  
51  
52  
53  
54  
55  
56  
57  
58  
59  
60

For peer review only



Figure 1: REVAMP Trial schema. V0 – visit 0; V1 – Visit 1; V2 – Visit 2; V4 – Visit 4; V7 – Visit 7; V8 – Visit 8; Abbreviations: iv – Intravenous; wks – weeks.

Supplementary Table 1: Primary, secondary and exploratory outcomes included in the trial registration for mothers and neonates.

|        | Protocol activity     | Outcome type                                                          | Outcome                                                                                      | Timepoint                                                                                                             |
|--------|-----------------------|-----------------------------------------------------------------------|----------------------------------------------------------------------------------------------|-----------------------------------------------------------------------------------------------------------------------|
| Mother | Laboratory procedures | Primary/secondary                                                     | Anaemia (Hb<11g/dL) as measured on venous blood via automated analyser                       | 4 weeks post-intervention (for both IV iron and commencement of oral iron), week 36, at delivery, 4 weeks postpartum  |
|        |                       | Secondary                                                             | Haemoglobin as measured on venous blood via automated analyser                               | 4 weeks post-intervention (for both IV iron and commencement of oral iron), week 36, at delivery, 4 weeks postpartum  |
|        |                       | Secondary                                                             | Ferritin as measured by serum ferritin                                                       | 4 weeks post-intervention (for both IV iron and commencement of oral iron), week 36, at delivery, 4 weeks postpartum  |
|        |                       | Exploratory                                                           | Iron deficiency by sTfR/Ferritin index assay                                                 | 4 weeks post-intervention (for both IV iron and commencement of oral iron), week 36, at delivery, 4 weeks postpartum  |
|        |                       | Secondary                                                             | Iron deficiency (ferritin < 15µg/L)                                                          | 4 weeks post-intervention (for both IV iron and commencement of oral iron), week 36, at delivery, 4 weeks postpartum  |
|        |                       | Exploratory                                                           | Incidence of placental malaria at delivery based on placental histologic examination         | Delivery                                                                                                              |
|        |                       | Exploratory                                                           | Incidence of peripheral parasitaemia by 36 weeks of gestation based on blood film microscopy | Randomisation to 36 weeks' gestation                                                                                  |
|        |                       | Exploratory                                                           | Prevalence of malaria parasitaemia based on blood film microscopy at each scheduled visit    | 4 weeks post-intervention (for both IV iron and commencement of oral iron), 36 weeks, at delivery, 4 weeks postpartum |
|        | Safety                | Hypophosphatemia based on biochemical measurement of serum Phosphate. | 4 weeks post-intervention (for both Iv iron and commencement of oral iron), 36 weeks         |                                                                                                                       |

|  |                     |             |                                                                                                                                                                                                                                        |                                                                                                                                                                                          |
|--|---------------------|-------------|----------------------------------------------------------------------------------------------------------------------------------------------------------------------------------------------------------------------------------------|------------------------------------------------------------------------------------------------------------------------------------------------------------------------------------------|
|  |                     | Safety      | Inflammation (elevated C-reactive protein by serum assay)                                                                                                                                                                              | 4 weeks post-intervention (for both IV iron and commencement of oral iron), 36 weeks' gestation                                                                                          |
|  |                     | Exploratory | Health systems costs of providing the treatments and follow-up for the intervention and comparator based on measurement of resource use and costing of relevant resources, with direct measurement of health care resource utilisation | Each planned visit that coincides with a pregnancy visit (baseline (second trimester), week 36, delivery), unplanned visits (e.g., during any episode of infection requiring management) |
|  | Household economics | Exploratory | Direct and indirect patient costs including patient out-of-pocket costs for both health care and other costs, e.g., transport/ food, and lost income for receiving the intervention and the comparator                                 | Each planned visit that coincides with a pregnancy visit (baseline (second trimester), week 36, delivery), unplanned visits (e.g., during any episode of infection requiring management) |
|  |                     | Exploratory | Fatigue measured by the Piper Fatigue Scale                                                                                                                                                                                            | 4 weeks post-intervention (for both IV iron and commencement of oral iron), week 36, 4 weeks postpartum                                                                                  |
|  | Maternal cognition  | Exploratory | Cognitive function using digit span forward and backward test, and mental rotation tests                                                                                                                                               | 4 weeks post-intervention (for both IV iron and commencement of oral iron), 4 weeks postpartum                                                                                           |
|  |                     | Safety      | Severe anaemia requiring blood transfusion as defined by clinical notes                                                                                                                                                                | From randomisation (receipt of oral or intravenous iron depending on allocation) to 4 weeks postpartum                                                                                   |
|  | Adverse events      | Safety      | Severe medical events: shock (systolic blood pressure <90mmHg), need for blood transfusion, ICU admission, or mortality: individually and as a composite outcome, based on direct clinical observation by study staff                  | From randomisation (receipt of oral or intravenous iron depending on allocation) to 4 weeks postpartum                                                                                   |

1  
2  
3  
4  
5  
6  
7  
8  
9  
10  
11  
12  
13  
14  
15  
16  
17  
18  
19  
20  
21  
22  
23  
24  
25  
26  
27  
28  
29  
30  
31  
32  
33  
34  
35  
36  
37  
38  
39  
40  
41  
42  
43  
44  
45  
46

|  |  |             |                                                                                                                                                                                 |                                            |
|--|--|-------------|---------------------------------------------------------------------------------------------------------------------------------------------------------------------------------|--------------------------------------------|
|  |  | Safety      | Adverse events, as recorded by direct questioning of participants during administration visit. Such adverse events may include flushing, rash, allergic reactions, headache etc | Time of administration of the intervention |
|  |  | Safety      | Incidence of all-cause sick visits to the clinic based on visits recorded by study staff at the study clinic                                                                    | Randomisation to delivery                  |
|  |  | Exploratory | Incidence of diarrhoea sick visits to the clinic based on visits recorded by study staff at the study clinic                                                                    | Randomisation to delivery                  |
|  |  | Safety      | Incidence of clinical malaria-specific sick visits to the clinic based on visits recorded by study staff at the study clinic                                                    | Randomisation to delivery                  |
|  |  | Safety      | Haemorrhage - antepartum or postpartum haemorrhage diagnosed by study clinical staff                                                                                            | Randomisation to 4 weeks postpartum        |
|  |  | Safety      | Mortality                                                                                                                                                                       | Randomisation to 1-month postpartum        |
|  |  | Exploratory | Shock defined by systolic blood pressure <90mmHg, as observed by study staff                                                                                                    | Randomisation to 1-month postpartum        |
|  |  | Safety      | Intensive care admission as observed by study staff                                                                                                                             | Recruitment to 1-month postpartum          |
|  |  | Safety      | Need for blood transfusion, as observed by study staff                                                                                                                          | Recruitment to 1-month postpartum          |

|         |                                        |             |                                                                                                                                              |                                                                                                                                             |
|---------|----------------------------------------|-------------|----------------------------------------------------------------------------------------------------------------------------------------------|---------------------------------------------------------------------------------------------------------------------------------------------|
|         |                                        | Safety      | Delayed Adverse Events as detected by open questioning by study staff                                                                        | Each scheduled visit (4 weeks post-intervention (for both IV iron and commencement of oral iron), 36 weeks, at delivery, 4 weeks postpartum |
|         |                                        | Exploratory | Hospitalisation- any unplanned admission to hospital beyond usual postpartum discharge procedures, as observed by study staff                | Following delivery                                                                                                                          |
|         | Morbidity                              | Primary     | Birth weight (as a continuous variable) using infant scales                                                                                  | Within 24 hours of birth                                                                                                                    |
| Neonate | Physical examination and anthropometry | Secondary   | Low birth weight (birth weight <2500g) as a dichotomous variable                                                                             | Within 24 hours of birth                                                                                                                    |
|         |                                        | Exploratory | Gestational age (based on baseline ultrasound dating of pregnancy) adjusted birth weight                                                     | <24 hours following birth                                                                                                                   |
|         |                                        | Secondary   | Small for gestational age as a dichotomous variable (<10th centile)                                                                          | <24 hours following birth                                                                                                                   |
|         |                                        | Secondary   | Gestation duration based on the calculated duration of gestation, using dating at baseline ultrasound examination to date of actual delivery | Delivery visit                                                                                                                              |
|         |                                        | Secondary   | Premature birth – neonate born prior to 37 completed weeks of gestation (including 36 weeks and 6 days), based on gestation duration         | Delivery visit                                                                                                                              |
|         |                                        | Exploratory | Haemoglobin of venous cord blood by an automated analyser                                                                                    | Delivery                                                                                                                                    |
|         | Laboratory procedures                  | Secondary   | Haemoglobin as measured on venous blood via automated analyser                                                                               | 1-month postpartum                                                                                                                          |



1  
2  
3  
4  
5  
6  
7  
8  
9  
10  
11  
12  
13  
14  
15  
16  
17  
18  
19  
20  
21  
22  
23  
24  
25  
26  
27  
28  
29  
30  
31  
32  
33  
34  
35  
36  
37  
38  
39  
40  
41  
42  
43  
44  
45  
46

|  |                |             |                                                                                                                                                                                                    |                                             |
|--|----------------|-------------|----------------------------------------------------------------------------------------------------------------------------------------------------------------------------------------------------|---------------------------------------------|
|  |                | Exploratory | Incidence of cord blood parasitaemia at delivery based on blood film microscopy                                                                                                                    | Delivery                                    |
|  |                | Exploratory | Ferritin by serum ferritin                                                                                                                                                                         | 1 month of age                              |
|  |                | Exploratory | Cord ferritin by serum ferritin                                                                                                                                                                    | Delivery                                    |
|  |                | Secondary   | Abortion - pregnancy loss before 28 completed weeks of gestation, as reported by the patient or based on clinical records, or as observed by study staff                                           | <28 weeks' gestation                        |
|  | Adverse events | Secondary   | Stillbirth – defined as the birth of a baby showing no signs of life after 28 weeks of gestation (>28 weeks), as reported by the patient, based on clinical records, or as observed by study staff | >28 weeks' gestation                        |
|  |                | Safety      | Neonatal mortality, as observed by study staff/ clinical notes                                                                                                                                     | Death of a child in the first month of life |
|  |                | Safety      | Neonatal intensive care admission as observed by study staff                                                                                                                                       | Birth to 1-month postpartum                 |
|  |                | Safety      | Neonatal intensive care admission as observed by study staff                                                                                                                                       | Birth to 1-month postpartum                 |

# Reporting checklist for protocol of a clinical trial.

Based on the SPIRIT guidelines.

## Instructions to authors

Complete this checklist by entering the page numbers from your manuscript where readers will find each of the items listed below.

Your article may not currently address all the items on the checklist. Please modify your text to include the missing information. If you are certain that an item does not apply, please write "n/a" and provide a short explanation.

Upload your completed checklist as an extra file when you submit to a journal.

In your methods section, say that you used the SPIRIT reporting guidelines, and cite them as:

Chan A-W, Tetzlaff JM, Gøtzsche PC, Altman DG, Mann H, Berlin J, Dickersin K, Hróbjartsson A, Schulz KF, Parulekar WR, Krleža-Jerić K, Laupacis A, Moher D. SPIRIT 2013 Explanation and Elaboration: Guidance for protocols of clinical trials. *BMJ*. 2013;346:e7586

|                                                         | Reporting Item                                                                                                                                | Page Number |
|---------------------------------------------------------|-----------------------------------------------------------------------------------------------------------------------------------------------|-------------|
| <b>Administrative information</b>                       |                                                                                                                                               |             |
| Title                                                   | <a href="#">#1</a> Descriptive title identifying the study design, population, interventions, and, if applicable, trial acronym               | 1           |
| Trial registration                                      | <a href="#">#2a</a> Trial identifier and registry name. If not yet registered, name of intended registry                                      | 2 & 4       |
| Trial registration: data set                            | <a href="#">#2b</a> All items from the World Health Organization Trial Registration Data Set                                                  | 4           |
| Protocol version                                        | <a href="#">#3</a> Date and version identifier                                                                                                | 4           |
| Funding                                                 | <a href="#">#4</a> Sources and types of financial, material, and other support                                                                | 26          |
| Roles and responsibilities: contributorship             | <a href="#">#5a</a> Names, affiliations, and roles of protocol contributors                                                                   | 1 & 2       |
| Roles and responsibilities: sponsor contact information | <a href="#">#5b</a> Name and contact information for the trial sponsor                                                                        | 4           |
| Roles and responsibilities:                             | <a href="#">#5c</a> Role of study sponsor and funders, if any, in study design; collection, management, analysis, and interpretation of data; | 4           |

|    |                                                           |                      |                                                                    |       |
|----|-----------------------------------------------------------|----------------------|--------------------------------------------------------------------|-------|
| 1  | sponsor and funder                                        |                      | writing of the report; and the decision to submit the report for   |       |
| 2  |                                                           |                      | publication, including whether they will have ultimate authority   |       |
| 3  |                                                           |                      | over any of these activities                                       |       |
| 4  |                                                           |                      |                                                                    |       |
| 5  | Roles and                                                 | <a href="#">#5d</a>  | Composition, roles, and responsibilities of the coordinating       | 19    |
| 6  | responsibilities:                                         |                      | centre, steering committee, endpoint adjudication committee,       |       |
| 7  | committees                                                |                      | data management team, and other individuals or groups              |       |
| 8  |                                                           |                      | overseeing the trial, if applicable (see Item 21a for data         |       |
| 9  |                                                           |                      | monitoring committee)                                              |       |
| 10 |                                                           |                      |                                                                    |       |
| 11 |                                                           |                      |                                                                    |       |
| 12 |                                                           |                      |                                                                    |       |
| 13 | <b>Introduction</b>                                       |                      |                                                                    |       |
| 14 |                                                           |                      |                                                                    |       |
| 15 | Background and                                            | <a href="#">#6a</a>  | Description of research question and justification for undertaking | 7     |
| 16 | rationale                                                 |                      | the trial, including summary of relevant studies (published and    |       |
| 17 |                                                           |                      | unpublished) examining benefits and harms for each intervention    |       |
| 18 |                                                           |                      |                                                                    |       |
| 19 |                                                           |                      |                                                                    |       |
| 20 | Background and                                            | <a href="#">#6b</a>  | Explanation for choice of comparators                              | 20    |
| 21 | rationale: choice of                                      |                      |                                                                    |       |
| 22 | comparators                                               |                      |                                                                    |       |
| 23 |                                                           |                      |                                                                    |       |
| 24 |                                                           |                      |                                                                    |       |
| 25 | Objectives                                                | <a href="#">#7</a>   | Specific objectives or hypotheses                                  | 9,10  |
| 26 |                                                           |                      |                                                                    |       |
| 27 | Trial design                                              | <a href="#">#8</a>   | Description of trial design including type of trial (eg, parallel  | 10    |
| 28 |                                                           |                      | group, crossover, factorial, single group), allocation ratio, and  |       |
| 29 |                                                           |                      | framework (eg, superiority, equivalence, non-inferiority,          |       |
| 30 |                                                           |                      | exploratory)                                                       |       |
| 31 |                                                           |                      |                                                                    |       |
| 32 |                                                           |                      |                                                                    |       |
| 33 | <b>Methods: Participants, interventions, and outcomes</b> |                      |                                                                    |       |
| 34 |                                                           |                      |                                                                    |       |
| 35 | Study setting                                             | <a href="#">#9</a>   | Description of study settings (eg, community clinic, academic      | 10,11 |
| 36 |                                                           |                      | hospital) and list of countries where data will be collected.      |       |
| 37 |                                                           |                      | Reference to where list of study sites can be obtained             |       |
| 38 |                                                           |                      |                                                                    |       |
| 39 |                                                           |                      |                                                                    |       |
| 40 | Eligibility criteria                                      | <a href="#">#10</a>  | Inclusion and exclusion criteria for participants. If applicable,  | 11,12 |
| 41 |                                                           |                      | eligibility criteria for study centres and individuals who will    |       |
| 42 |                                                           |                      | perform the interventions (eg, surgeons, psychotherapists)         |       |
| 43 |                                                           |                      |                                                                    |       |
| 44 |                                                           |                      |                                                                    |       |
| 45 | Interventions:                                            | <a href="#">#11a</a> | Interventions for each group with sufficient detail to allow       | 12,13 |
| 46 | description                                               |                      | replication, including how and when they will be administered      |       |
| 47 |                                                           |                      |                                                                    |       |
| 48 |                                                           |                      |                                                                    |       |
| 49 | Interventions:                                            | <a href="#">#11b</a> | Criteria for discontinuing or modifying allocated interventions    | 13    |
| 50 | modifications                                             |                      | for a given trial participant (eg, drug dose change in response to |       |
| 51 |                                                           |                      | harms, participant request, or improving / worsening disease)      |       |
| 52 |                                                           |                      |                                                                    |       |
| 53 |                                                           |                      |                                                                    |       |
| 54 | Interventions:                                            | <a href="#">#11c</a> | Strategies to improve adherence to intervention protocols, and     | 13    |
| 55 | adherence                                                 |                      | any procedures for monitoring adherence (eg, drug tablet return;   |       |
| 56 |                                                           |                      | laboratory tests)                                                  |       |
| 57 |                                                           |                      |                                                                    |       |
| 58 |                                                           |                      |                                                                    |       |
| 59 |                                                           |                      |                                                                    |       |
| 60 |                                                           |                      |                                                                    |       |

|    |                  |                      |                                                                  |        |
|----|------------------|----------------------|------------------------------------------------------------------|--------|
| 1  | Interventions:   | <a href="#">#11d</a> | Relevant concomitant care and interventions that are permitted   | 13     |
| 2  | concomitant care |                      | or prohibited during the trial                                   |        |
| 3  |                  |                      |                                                                  |        |
| 4  | Outcomes         | <a href="#">#12</a>  | Primary, secondary, and other outcomes, including the specific   | 21     |
| 5  |                  |                      | measurement variable (eg, systolic blood pressure), analysis     |        |
| 6  |                  |                      | metric (eg, change from baseline, final value, time to event),   |        |
| 7  |                  |                      | method of aggregation (eg, median, proportion), and time point   |        |
| 8  |                  |                      | for each outcome. Explanation of the clinical relevance of       |        |
| 9  |                  |                      | chosen efficacy and harm outcomes is strongly recommended        |        |
| 10 |                  |                      |                                                                  |        |
| 11 | Participant      | <a href="#">#13</a>  | Time schedule of enrolment, interventions (including any run-ins | 10,18, |
| 12 | timeline         |                      | and washouts), assessments, and visits for participants. A       |        |
| 13 |                  |                      | schematic diagram is highly recommended (see Figure)             | 19,20  |
| 14 |                  |                      |                                                                  |        |
| 15 | Sample size      | <a href="#">#14</a>  | Estimated number of participants needed to achieve study         | 22, 23 |
| 16 |                  |                      | objectives and how it was determined, including clinical and     |        |
| 17 |                  |                      | statistical assumptions supporting any sample size calculations  |        |
| 18 |                  |                      |                                                                  |        |
| 19 | Recruitment      | <a href="#">#15</a>  | Strategies for achieving adequate participant enrolment to reach | 18     |
| 20 |                  |                      | target sample size                                               |        |
| 21 |                  |                      |                                                                  |        |
| 22 |                  |                      |                                                                  |        |
| 23 |                  |                      |                                                                  |        |
| 24 |                  |                      |                                                                  |        |
| 25 |                  |                      |                                                                  |        |
| 26 |                  |                      |                                                                  |        |

#### 27 **Methods: Assignment of interventions (for controlled trials)**

|    |                    |                      |                                                                    |       |
|----|--------------------|----------------------|--------------------------------------------------------------------|-------|
| 28 |                    |                      |                                                                    |       |
| 29 | Allocation:        | <a href="#">#16a</a> | Method of generating the allocation sequence (eg, computer-        | 13    |
| 30 | sequence           |                      | generated random numbers), and list of any factors for             |       |
| 31 | generation         |                      | stratification. To reduce predictability of a random sequence,     |       |
| 32 |                    |                      | details of any planned restriction (eg, blocking) should be        |       |
| 33 |                    |                      | provided in a separate document that is unavailable to those who   |       |
| 34 |                    |                      | enrol participants or assign interventions                         |       |
| 35 |                    |                      |                                                                    |       |
| 36 |                    |                      |                                                                    |       |
| 37 |                    |                      |                                                                    |       |
| 38 | Allocation         | <a href="#">#16b</a> | Mechanism of implementing the allocation sequence (eg, central     | 13    |
| 39 | concealment        |                      | telephone; sequentially numbered, opaque, sealed envelopes),       |       |
| 40 | mechanism          |                      | describing any steps to conceal the sequence until interventions   |       |
| 41 |                    |                      | are assigned                                                       |       |
| 42 |                    |                      |                                                                    |       |
| 43 |                    |                      |                                                                    |       |
| 44 | Allocation:        | <a href="#">#16c</a> | Who will generate the allocation sequence, who will enrol          | 13    |
| 45 | implementation     |                      | participants, and who will assign participants to interventions    |       |
| 46 |                    |                      |                                                                    |       |
| 47 |                    |                      |                                                                    |       |
| 48 | Blinding (masking) | <a href="#">#17a</a> | Who will be blinded after assignment to interventions (eg, trial   | 13,14 |
| 49 |                    |                      | participants, care providers, outcome assessors, data analysts),   |       |
| 50 |                    |                      | and how                                                            |       |
| 51 |                    |                      |                                                                    |       |
| 52 |                    |                      |                                                                    |       |
| 53 | Blinding           | <a href="#">#17b</a> | If blinded, circumstances under which unblinding is permissible,   | 13,14 |
| 54 | (masking):         |                      | and procedure for revealing a participant's allocated intervention |       |
| 55 | emergency          |                      | during the trial                                                   |       |
| 56 | unblinding         |                      |                                                                    |       |
| 57 |                    |                      |                                                                    |       |
| 58 |                    |                      |                                                                    |       |
| 59 |                    |                      |                                                                    |       |
| 60 |                    |                      |                                                                    |       |

## 1 **Methods: Data collection, management, and analysis**

|    |                      |                      |                                                                                 |
|----|----------------------|----------------------|---------------------------------------------------------------------------------|
| 2  |                      |                      |                                                                                 |
| 3  | Data collection      | <a href="#">#18a</a> | Plans for assessment and collection of outcome, baseline, and 20                |
| 4  | plan                 |                      | other trial data, including any related processes to promote data               |
| 5  |                      |                      | quality (eg, duplicate measurements, training of assessors) and a               |
| 6  |                      |                      | description of study instruments (eg, questionnaires, laboratory                |
| 7  |                      |                      | tests) along with their reliability and validity, if known.                     |
| 8  |                      |                      | Reference to where data collection forms can be found, if not in                |
| 9  |                      |                      | the protocol                                                                    |
| 10 |                      |                      |                                                                                 |
| 11 | Data collection      | <a href="#">#18b</a> | Plans to promote participant retention and complete follow-up, 20,21            |
| 12 | plan: retention      |                      | including list of any outcome data to be collected for participants             |
| 13 |                      |                      | who discontinue or deviate from intervention protocols                          |
| 14 |                      |                      |                                                                                 |
| 15 | Data management      | <a href="#">#19</a>  | Plans for data entry, coding, security, and storage, including any 24           |
| 16 |                      |                      | related processes to promote data quality (eg, double data entry;               |
| 17 |                      |                      | range checks for data values). Reference to where details of data               |
| 18 |                      |                      | management procedures can be found, if not in the protocol                      |
| 19 |                      |                      |                                                                                 |
| 20 | Statistics:          | <a href="#">#20a</a> | Statistical methods for analysing primary and secondary 23                      |
| 21 | outcomes             |                      | outcomes. Reference to where other details of the statistical                   |
| 22 |                      |                      | analysis plan can be found, if not in the protocol                              |
| 23 |                      |                      |                                                                                 |
| 24 | Statistics:          | <a href="#">#20b</a> | Methods for any additional analyses (eg, subgroup and adjusted n/a: statistical |
| 25 | additional analyses  |                      | analyses) analysis plan to                                                      |
| 26 |                      |                      | be published                                                                    |
| 27 |                      |                      | separately                                                                      |
| 28 |                      |                      |                                                                                 |
| 29 | Statistics: analysis | <a href="#">#20c</a> | Definition of analysis population relating to protocol non- 23 (SAP to be       |
| 30 | population and       |                      | adherence (eg, as randomised analysis), and any statistical published           |
| 31 | missing data         |                      | methods to handle missing data (eg, multiple imputation) separately)            |
| 32 |                      |                      |                                                                                 |
| 33 |                      |                      |                                                                                 |
| 34 |                      |                      |                                                                                 |
| 35 |                      |                      |                                                                                 |
| 36 |                      |                      |                                                                                 |
| 37 |                      |                      |                                                                                 |
| 38 |                      |                      |                                                                                 |
| 39 |                      |                      |                                                                                 |
| 40 |                      |                      |                                                                                 |

## 41 **Methods:**

## 42 **Monitoring**

|    |                  |                      |                                                                          |
|----|------------------|----------------------|--------------------------------------------------------------------------|
| 43 |                  |                      |                                                                          |
| 44 | Data monitoring: | <a href="#">#21a</a> | Composition of data monitoring committee (DMC); summary of 19            |
| 45 | formal committee |                      | its role and reporting structure; statement of whether it is             |
| 46 |                  |                      | independent from the sponsor and competing interests; and                |
| 47 |                  |                      | reference to where further details about its charter can be found,       |
| 48 |                  |                      | if not in the protocol. Alternatively, an explanation of why a           |
| 49 |                  |                      | DMC is not needed                                                        |
| 50 |                  |                      |                                                                          |
| 51 | Data monitoring: | <a href="#">#21b</a> | Description of any interim analyses and stopping guidelines, 23,24       |
| 52 | interim analysis |                      | including who will have access to these interim results and make         |
| 53 |                  |                      | the final decision to terminate the trial                                |
| 54 |                  |                      |                                                                          |
| 55 | Harms            | <a href="#">#22</a>  | Plans for collecting, assessing, reporting, and managing solicited 21,22 |
| 56 |                  |                      |                                                                          |
| 57 |                  |                      |                                                                          |
| 58 |                  |                      |                                                                          |
| 59 |                  |                      |                                                                          |
| 60 |                  |                      |                                                                          |

and spontaneously reported adverse events and other unintended effects of trial interventions or trial conduct

|    |                                      |                      |                                                                                                                                                                                                                                                                                          |
|----|--------------------------------------|----------------------|------------------------------------------------------------------------------------------------------------------------------------------------------------------------------------------------------------------------------------------------------------------------------------------|
| 1  |                                      |                      |                                                                                                                                                                                                                                                                                          |
| 2  |                                      |                      |                                                                                                                                                                                                                                                                                          |
| 3  |                                      |                      |                                                                                                                                                                                                                                                                                          |
| 4  | Auditing                             | <a href="#">#23</a>  | Frequency and procedures for auditing trial conduct, if any, and whether the process will be independent from investigators and the sponsor 19                                                                                                                                           |
| 5  |                                      |                      |                                                                                                                                                                                                                                                                                          |
| 6  |                                      |                      |                                                                                                                                                                                                                                                                                          |
| 7  |                                      |                      |                                                                                                                                                                                                                                                                                          |
| 8  |                                      |                      |                                                                                                                                                                                                                                                                                          |
| 9  | <b>Ethics and dissemination</b>      |                      |                                                                                                                                                                                                                                                                                          |
| 10 |                                      |                      |                                                                                                                                                                                                                                                                                          |
| 11 | Research ethics approval             | <a href="#">#24</a>  | Plans for seeking research ethics committee / institutional review board (REC / IRB) approval 4                                                                                                                                                                                          |
| 12 |                                      |                      |                                                                                                                                                                                                                                                                                          |
| 13 |                                      |                      |                                                                                                                                                                                                                                                                                          |
| 14 | Protocol amendments                  | <a href="#">#25</a>  | Plans for communicating important protocol modifications (eg, changes to eligibility criteria, outcomes, analyses) to relevant parties (eg, investigators, REC / IRBs, trial participants, trial registries, journals, regulators) 4                                                     |
| 15 |                                      |                      |                                                                                                                                                                                                                                                                                          |
| 16 |                                      |                      |                                                                                                                                                                                                                                                                                          |
| 17 |                                      |                      |                                                                                                                                                                                                                                                                                          |
| 18 |                                      |                      |                                                                                                                                                                                                                                                                                          |
| 19 |                                      |                      |                                                                                                                                                                                                                                                                                          |
| 20 | Consent or assent                    | <a href="#">#26a</a> | Who will obtain informed consent or assent from potential trial participants or authorised surrogates, and how (see Item 32) See supplementary material 1                                                                                                                                |
| 21 |                                      |                      |                                                                                                                                                                                                                                                                                          |
| 22 |                                      |                      |                                                                                                                                                                                                                                                                                          |
| 23 |                                      |                      |                                                                                                                                                                                                                                                                                          |
| 24 |                                      |                      |                                                                                                                                                                                                                                                                                          |
| 25 | Consent or assent: ancillary studies | <a href="#">#26b</a> | Additional consent provisions for collection and use of participant data and biological specimens in ancillary studies, if applicable See supp. Material 1                                                                                                                               |
| 26 |                                      |                      |                                                                                                                                                                                                                                                                                          |
| 27 |                                      |                      |                                                                                                                                                                                                                                                                                          |
| 28 |                                      |                      |                                                                                                                                                                                                                                                                                          |
| 29 |                                      |                      |                                                                                                                                                                                                                                                                                          |
| 30 | Confidentiality                      | <a href="#">#27</a>  | How personal information about potential and enrolled participants will be collected, shared, and maintained in order to protect confidentiality before, during, and after the trial 23,24                                                                                               |
| 31 |                                      |                      |                                                                                                                                                                                                                                                                                          |
| 32 |                                      |                      |                                                                                                                                                                                                                                                                                          |
| 33 |                                      |                      |                                                                                                                                                                                                                                                                                          |
| 34 |                                      |                      |                                                                                                                                                                                                                                                                                          |
| 35 | Declaration of interests             | <a href="#">#28</a>  | Financial and other competing interests for principal investigators for the overall trial and each study site 25                                                                                                                                                                         |
| 36 |                                      |                      |                                                                                                                                                                                                                                                                                          |
| 37 |                                      |                      |                                                                                                                                                                                                                                                                                          |
| 38 |                                      |                      |                                                                                                                                                                                                                                                                                          |
| 39 | Data access                          | <a href="#">#29</a>  | Statement of who will have access to the final trial dataset, and disclosure of contractual agreements that limit such access for investigators 23,24                                                                                                                                    |
| 40 |                                      |                      |                                                                                                                                                                                                                                                                                          |
| 41 |                                      |                      |                                                                                                                                                                                                                                                                                          |
| 42 |                                      |                      |                                                                                                                                                                                                                                                                                          |
| 43 |                                      |                      |                                                                                                                                                                                                                                                                                          |
| 44 | Ancillary and post trial care        | <a href="#">#30</a>  | Provisions, if any, for ancillary and post-trial care, and for compensation to those who suffer harm from trial participation 21                                                                                                                                                         |
| 45 |                                      |                      |                                                                                                                                                                                                                                                                                          |
| 46 |                                      |                      |                                                                                                                                                                                                                                                                                          |
| 47 | Dissemination policy: trial results  | <a href="#">#31a</a> | Plans for investigators and sponsor to communicate trial results to participants, healthcare professionals, the public, and other relevant groups (eg, via publication, reporting in results databases, or other data sharing arrangements), including any publication restrictions 8,24 |
| 48 |                                      |                      |                                                                                                                                                                                                                                                                                          |
| 49 |                                      |                      |                                                                                                                                                                                                                                                                                          |
| 50 |                                      |                      |                                                                                                                                                                                                                                                                                          |
| 51 |                                      |                      |                                                                                                                                                                                                                                                                                          |
| 52 |                                      |                      |                                                                                                                                                                                                                                                                                          |
| 53 |                                      |                      |                                                                                                                                                                                                                                                                                          |
| 54 |                                      |                      |                                                                                                                                                                                                                                                                                          |
| 55 | Dissemination policy: authorship     | <a href="#">#31b</a> | Authorship eligibility guidelines and any intended use of professional writers 24                                                                                                                                                                                                        |
| 56 |                                      |                      |                                                                                                                                                                                                                                                                                          |
| 57 |                                      |                      |                                                                                                                                                                                                                                                                                          |
| 58 |                                      |                      |                                                                                                                                                                                                                                                                                          |
| 59 |                                      |                      |                                                                                                                                                                                                                                                                                          |
| 60 |                                      |                      |                                                                                                                                                                                                                                                                                          |

|                            |                                                      |                      |                                                                                                                    |                                                                    |
|----------------------------|------------------------------------------------------|----------------------|--------------------------------------------------------------------------------------------------------------------|--------------------------------------------------------------------|
| 1<br>2<br>3<br>4<br>5<br>6 | Dissemination<br>policy:<br>reproducible<br>research | <a href="#">#31c</a> | Plans, if any, for granting public access to the full protocol,<br>participant-level dataset, and statistical code | n/a; statistical<br>analyses plan to<br>be published<br>separately |
|----------------------------|------------------------------------------------------|----------------------|--------------------------------------------------------------------------------------------------------------------|--------------------------------------------------------------------|

## 7 Appendices

|                     |                               |                     |                                                                                                       |                             |
|---------------------|-------------------------------|---------------------|-------------------------------------------------------------------------------------------------------|-----------------------------|
| 9<br>10<br>11<br>12 | Informed consent<br>materials | <a href="#">#32</a> | Model consent form and other related documentation given to<br>participants and authorised surrogates | Supplementary<br>material 1 |
|---------------------|-------------------------------|---------------------|-------------------------------------------------------------------------------------------------------|-----------------------------|

|                            |                         |                     |                                                                                                                                                                                                      |           |
|----------------------------|-------------------------|---------------------|------------------------------------------------------------------------------------------------------------------------------------------------------------------------------------------------------|-----------|
| 13<br>14<br>15<br>16<br>17 | Biological<br>specimens | <a href="#">#33</a> | Plans for collection, laboratory evaluation, and storage of<br>biological specimens for genetic or molecular analysis in the<br>current trial and for future use in ancillary studies, if applicable | 14,15, 16 |
|----------------------------|-------------------------|---------------------|------------------------------------------------------------------------------------------------------------------------------------------------------------------------------------------------------|-----------|

18 None The SPIRIT Explanation and Elaboration paper is distributed under the terms of the Creative Commons Attribution  
19 License CC-BY-NC. This checklist can be completed online using <https://www.goodreports.org/>, a tool made by the  
20 [EQUATOR Network](#) in collaboration with [Penelope.ai](#)  
21
