# Supplementary material for: Protocol for a multicentre, parallel-group, open-label randomised controlled trial comparing ferric carboxymaltose with the standard of care in anaemic Malawian pregnant women: the REVAMP trial
Source: PubMed Central journal article supplement (PMC8611444; doi:10.1136/bmjopen-2021-053288), 2021-11-23
Supplement: bmjopen-2021-053288supp001.pdf [file bmjopen-2021-053288supp001.pdf]

Supplementary Table 1: Primary, secondary and exploratory outcomes included in the trial registration for mothers and neonates.

|        | Protocol activity     | Outcome type      | Outcome                                                                                      | Timepoint                                                                                                             |
|--------|-----------------------|-------------------|----------------------------------------------------------------------------------------------|-----------------------------------------------------------------------------------------------------------------------|
| Mother | Laboratory procedures | Primary/secondary | Anaemia (Hb<11g/dL) as measured on venous blood via automated analyser                       | 4 weeks post-intervention (for both IV iron and commencement of oral iron), week 36, at delivery, 4 weeks postpartum  |
|        |                       | Secondary         | Haemoglobin as measured on venous blood via automated analyser                               | 4 weeks post-intervention (for both IV iron and commencement of oral iron), week 36, at delivery, 4 weeks postpartum  |
|        |                       | Secondary         | Ferritin as measured by serum ferritin                                                       | 4 weeks post-intervention (for both IV iron and commencement of oral iron), week 36, at delivery, 4 weeks postpartum  |
|        |                       | Exploratory       | Iron deficiency by sTfR/Ferritin index assay                                                 | 4 weeks post-intervention (for both IV iron and commencement of oral iron), week 36, at delivery, 4 weeks postpartum  |
|        |                       | Secondary         | Iron deficiency (ferritin < 15µg/L)                                                          | 4 weeks post-intervention (for both IV iron and commencement of oral iron), week 36, at delivery, 4 weeks postpartum  |
|        |                       | Exploratory       | Incidence of placental malaria at delivery based on placental histologic examination         | Delivery                                                                                                              |
|        |                       | Exploratory       | Incidence of peripheral parasitaemia by 36 weeks of gestation based on blood film microscopy | Randomisation to 36 weeks' gestation                                                                                  |
|        |                       | Exploratory       | Prevalence of malaria parasitaemia based on blood film microscopy at each scheduled visit    | 4 weeks post-intervention (for both IV iron and commencement of oral iron), 36 weeks, at delivery, 4 weeks postpartum |
|        |                       | Safety            | Hypophosphatemia based on biochemical measurement of serum Phosphate.                        | 4 weeks post-intervention (for both Iv iron and commencement of oral iron), 36 weeks                                  |

|  |                     |             |                                                                                                                                                                                                                                        |                                                                                                                                                                                          |
|--|---------------------|-------------|----------------------------------------------------------------------------------------------------------------------------------------------------------------------------------------------------------------------------------------|------------------------------------------------------------------------------------------------------------------------------------------------------------------------------------------|
|  |                     | Safety      | Inflammation (elevated C-reactive protein by serum assay)                                                                                                                                                                              | 4 weeks post-intervention (for both Iv iron and commencement of oral iron), 36 weeks' gestation                                                                                          |
|  |                     | Exploratory | Health systems costs of providing the treatments and follow-up for the intervention and comparator based on measurement of resource use and costing of relevant resources, with direct measurement of health care resource utilisation | Each planned visit that coincides with a pregnancy visit (baseline (second trimester), week 36, delivery), unplanned visits (e.g., during any episode of infection requiring management) |
|  | Household economics | Exploratory | Direct and indirect patient costs including patient out-of-pocket costs for both health care and other costs, e.g., transport/ food, and lost income for receiving the intervention and the comparator                                 | Each planned visit that coincides with a pregnancy visit (baseline (second trimester), week 36, delivery), unplanned visits (e.g., during any episode of infection requiring management) |
|  |                     | Exploratory | Fatigue measured by the Piper Fatigue Scale                                                                                                                                                                                            | 4 weeks post-intervention (for both IV iron and commencement of oral iron), week 36, 4 weeks postpartum                                                                                  |
|  | Maternal cognition  | Exploratory | Cognitive function using digit span forward and backward test, and mental rotation tests                                                                                                                                               | 4 weeks post-intervention (for both IV iron and commencement of oral iron), 4 weeks postpartum                                                                                           |
|  |                     | Safety      | Severe anaemia requiring blood transfusion as defined by clinical notes                                                                                                                                                                | From randomisation (receipt of oral or intravenous iron depending on allocation) to 4 weeks postpartum                                                                                   |
|  | Adverse events      | Safety      | Severe medical events: shock (systolic blood pressure <90mmHg), need for blood transfusion, ICU admission, or mortality: individually and as a composite outcome, based on direct clinical observation by study staff                  | From randomisation (receipt of oral or intravenous iron depending on allocation) to 4 weeks postpartum                                                                                   |

|  |  |             |                                                                                                                                                                                 |                                            |
|--|--|-------------|---------------------------------------------------------------------------------------------------------------------------------------------------------------------------------|--------------------------------------------|
|  |  | Safety      | Adverse events, as recorded by direct questioning of participants during administration visit. Such adverse events may include flushing, rash, allergic reactions, headache etc | Time of administration of the intervention |
|  |  | Safety      | Incidence of all-cause sick visits to the clinic based on visits recorded by study staff at the study clinic                                                                    | Randomisation to delivery                  |
|  |  | Exploratory | Incidence of diarrhoea sick visits to the clinic based on visits recorded by study staff at the study clinic                                                                    | Randomisation to delivery                  |
|  |  | Safety      | Incidence of clinical malaria-specific sick visits to the clinic based on visits recorded by study staff at the study clinic                                                    | Randomisation to delivery                  |
|  |  | Safety      | Haemorrhage - antepartum or postpartum haemorrhage diagnosed by study clinical staff                                                                                            | Randomisation to 4 weeks postpartum        |
|  |  | Safety      | Mortality                                                                                                                                                                       | Randomisation to 1-month postpartum        |
|  |  | Exploratory | Shock defined by systolic blood pressure <90mmHg, as observed by study staff                                                                                                    | Randomisation to 1-month postpartum        |
|  |  | Safety      | Intensive care admission as observed by study staff                                                                                                                             | Recruitment to 1-month postpartum          |
|  |  | Safety      | Need for blood transfusion, as observed by study staff                                                                                                                          | Recruitment to 1-month postpartum          |

|         |                                        |             |                                                                                                                                              |                                                                                                                                              |
|---------|----------------------------------------|-------------|----------------------------------------------------------------------------------------------------------------------------------------------|----------------------------------------------------------------------------------------------------------------------------------------------|
|         |                                        | Safety      | Delayed Adverse Events as detected by open questioning by study staff                                                                        | Each scheduled visit (4 weeks post-intervention (for both IV iron and commencement of oral iron), 36 weeks, at delivery, 4 weeks postpartum) |
|         |                                        | Exploratory | Hospitalisation- any unplanned admission to hospital beyond usual postpartum discharge procedures, as observed by study staff                | Following delivery                                                                                                                           |
|         | Morbidity                              | Primary     | Birth weight (as a continuous variable) using infant scales                                                                                  | Within 24 hours of birth                                                                                                                     |
| Neonate | Physical examination and anthropometry | Secondary   | Low birth weight (birth weight <2500g) as a dichotomous variable                                                                             | Within 24 hours of birth                                                                                                                     |
|         |                                        | Exploratory | Gestational age (based on baseline ultrasound dating of pregnancy) adjusted birth weight                                                     | <24 hours following birth                                                                                                                    |
|         |                                        | Secondary   | Small for gestational age as a dichotomous variable (<10th centile)                                                                          | <24 hours following birth                                                                                                                    |
|         |                                        | Secondary   | Gestation duration based on the calculated duration of gestation, using dating at baseline ultrasound examination to date of actual delivery | Delivery visit                                                                                                                               |
|         |                                        | Secondary   | Premature birth – neonate born prior to 37 completed weeks of gestation (including 36 weeks and 6 days), based on gestation duration         | Delivery visit                                                                                                                               |
|         |                                        | Exploratory | Haemoglobin of venous cord blood by an automated analyser                                                                                    | Delivery                                                                                                                                     |
|         | Laboratory procedures                  | Secondary   | Haemoglobin as measured on venous blood via automated analyser                                                                               | 1-month postpartum                                                                                                                           |

|  |                |             |                                                                                                                                                                                                    |                                             |
|--|----------------|-------------|----------------------------------------------------------------------------------------------------------------------------------------------------------------------------------------------------|---------------------------------------------|
|  |                | Exploratory | Incidence of cord blood parasitaemia at delivery based on blood film microscopy                                                                                                                    | Delivery                                    |
|  |                | Exploratory | Ferritin by serum ferritin                                                                                                                                                                         | 1 month of age                              |
|  |                | Exploratory | Cord ferritin by serum ferritin                                                                                                                                                                    | Delivery                                    |
|  |                | Secondary   | Abortion - pregnancy loss before 28 completed weeks of gestation, as reported by the patient or based on clinical records, or as observed by study staff                                           | <28 weeks' gestation                        |
|  | Adverse events | Secondary   | Stillbirth – defined as the birth of a baby showing no signs of life after 28 weeks of gestation (>28 weeks), as reported by the patient, based on clinical records, or as observed by study staff | >28 weeks' gestation                        |
|  |                | Safety      | Neonatal mortality, as observed by study staff/ clinical notes                                                                                                                                     | Death of a child in the first month of life |
|  |                | Safety      | Neonatal intensive care admission as observed by study staff                                                                                                                                       | Birth to 1-month postpartum                 |
|  |                | Safety      | Neonatal intensive care admission as observed by study staff                                                                                                                                       | Birth to 1-month postpartum                 |
